# Supplementary material for: Costunolide and dehydrocostuslactone combination treatment inhibit breast cancer by inducing cell cycle arrest and apoptosis through c-Myc/p53 and AKT/14-3-3 pathway
Source: PubMed Central journal article supplement (PMC5259746; doi:10.1038/srep41254), 2017-01-24
Supplement: srep41254-s1.pdf [file srep41254-s1.pdf]

## Supplementary Information

**Costunolide and dehydrocostuslactone combination treatment inhibit breast cancer by inducing cell cycle arrest and apoptosis through c-Myc/p53 and AKT/14-3-3 pathway**

Zhangxiao Peng<sup>1,2,\*</sup>, Yan Wang<sup>2,\*</sup>, Jianhui Fan<sup>1,\*</sup>, Xuejing Lin<sup>1</sup>, Chunying Liu<sup>1</sup>, Yang Xu<sup>1</sup>, Weidan Ji<sup>1</sup>, Chao Yan<sup>2</sup> & Changqing Su<sup>1</sup>

<sup>1</sup>Department of Molecular Oncology, Eastern Hepatobiliary Surgical Hospital & National Center of Liver Cancer, Second Military Medical University, Shanghai 200438, China

<sup>2</sup>School of Pharmacy, Shanghai Jiao Tong University, Shanghai 200240, China

\* These authors contributed equally to this work.

Correspondence and requests for materials should be addressed to C. Su (email: [suchangqing@gmail.com](mailto:suchangqing@gmail.com)) or C. Yan. (email: [chaoyan@unimicrotech.com](mailto:chaoyan@unimicrotech.com))

**Table S1 Identified a total of 430 proteins in set one**

| #    | Identified Proteins                                                                    | Accession Number    | Molecular Weight | Probability |
|------|----------------------------------------------------------------------------------------|---------------------|------------------|-------------|
| 1    | Neuroblast differentiation-associated protein AHNAK OS=Homo sapiens GN=AHNAK PE=1 SV=2 | AHNAK_HUMAN         | 629 kDa          | 100%        |
| 2    | Keratin, type II cytoskeletal 8 OS=Homo sapiens GN=KRT8 PE=1 SV=7                      | K2C8_HUMAN          | 54 kDa           | 100%        |
| 3    | Myosin-9 OS=Homo sapiens GN=MYH9 PE=1 SV=4                                             | MYH9_HUMAN          | 227 kDa          | 100%        |
| 4    | Cluster of Tubulin beta chain OS=Homo sapiens GN=TUBB PE=1 SV=2 (TBB5_HUMAN)           | TBB5_HUMAN [2]      | 50 kDa           | 100%        |
| 4.1  | Tubulin beta chain OS=Homo sapiens GN=TUBB PE=1 SV=2                                   | TBB5_HUMAN          | 50 kDa           | 100%        |
| 4.2  | Tubulin beta-4B chain OS=Homo sapiens GN=TUBB4B PE=1 SV=1                              | TBB4B_HUMAN         | 50 kDa           | 100%        |
| 5    | Tubulin alpha-1A chain OS=Homo sapiens GN=TUBA1A PE=1 SV=1                             | TBA1A_HUMAN<br>(+2) | 50 kDa           | 100%        |
| 6    | Transcription intermediary factor 1-beta OS=Homo sapiens GN=TRIM28 PE=1 SV=5           | TIF1B_HUMAN         | 89 kDa           | 100%        |
| 7    | Nucleolin OS=Homo sapiens GN=NCL PE=1 SV=3                                             | NUCL_HUMAN          | 77 kDa           | 100%        |
| 8    | Heat shock 70 kDa protein 4 OS=Homo sapiens GN=HSPA4 PE=1 SV=4                         | HSP74_HUMAN         | 94 kDa           | 98%         |
| 9    | Cluster of Filamin-A OS=Homo sapiens GN=FLNA PE=1 SV=4 (FLNA_HUMAN)                    | FLNA_HUMAN [3]      | 281 kDa          | 100%        |
| 9.1  | Filamin-A OS=Homo sapiens GN=FLNA PE=1 SV=4                                            | FLNA_HUMAN          | 281 kDa          | 100%        |
| 9.2  | Filamin-B OS=Homo sapiens GN=FLNB PE=1 SV=2                                            | FLNB_HUMAN          | 278 kDa          | 99%         |
| 9.3  | Filamin-C OS=Homo sapiens GN=FLNC PE=1 SV=3                                            | FLNC_HUMAN          | 291 kDa          | 76%         |
| 10   | Cluster of Tropomyosin alpha-4 chain OS=Homo sapiens GN=TPM4 PE=1 SV=3 (TPM4_HUMAN)    | TPM4_HUMAN [3]      | 29 kDa           | 100%        |
| 10.1 | Tropomyosin alpha-4 chain OS=Homo sapiens GN=TPM4 PE=1 SV=3                            | TPM4_HUMAN          | 29 kDa           | 100%        |
| 10.2 | Tropomyosin alpha-3 chain OS=Homo sapiens GN=TPM3 PE=1 SV=1                            | TPM3_HUMAN          | 33 kDa           | 84%         |
| 11   | Brain acid soluble protein 1 OS=Homo sapiens GN=BASP1 PE=1 SV=2                        | BASP1_HUMAN         | 23 kDa           | 99%         |

|          |                                                                                       |                     |         |      |
|----------|---------------------------------------------------------------------------------------|---------------------|---------|------|
| 12       | Keratin, type I cytoskeletal 18 OS=Homo sapiens GN=KRT18 PE=1 SV=2                    | K1C18_HUMAN         | 48 kDa  | 100% |
| 13       | Fructose-bisphosphate aldolase C OS=Homo sapiens GN=ALDOC PE=1 SV=2                   | ALDOC_HUMAN         | 39 kDa  | 99%  |
| 14       | Profilin-1 OS=Homo sapiens GN=PFN1 PE=1 SV=2                                          | PROF1_HUMAN         | 15 kDa  | 99%  |
| 15       | Pyruvate kinase isozymes M1/M2 OS=Homo sapiens GN=PKM PE=1 SV=4                       | KPYM_HUMAN          | 58 kDa  | 100% |
| 16       | Alpha-enolase OS=Homo sapiens GN=ENO1 PE=1 SV=2                                       | ENOA_HUMAN          | 47 kDa  | 100% |
| 17       | Cluster of Actin, cytoplasmic 1 OS=Homo sapiens GN=ACTB PE=1 SV=1 (ACTB_HUMAN)        | ACTB_HUMAN [6]      | 42 kDa  | 100% |
| 17.<br>1 | Actin, cytoplasmic 1 OS=Homo sapiens GN=ACTB PE=1 SV=1                                | ACTB_HUMAN (+1)     | 42 kDa  | 81%  |
| 17.<br>2 | Actin, aortic smooth muscle OS=Homo sapiens GN=ACTA2 PE=1 SV=1                        | ACTA_HUMAN (+3)     | 42 kDa  | 79%  |
| 18       | 60S ribosomal protein L4 OS=Homo sapiens GN=RPL4 PE=1 SV=5                            | RL4_HUMAN           | 48 kDa  | 100% |
| 19       | Ubiquitin-60S ribosomal protein L40 OS=Homo sapiens GN=UBA52 PE=1 SV=2                | RL40_HUMAN (+3)     | 15 kDa  | 99%  |
| 20       | 78 kDa glucose-regulated protein OS=Homo sapiens GN=HSPA5 PE=1 SV=2                   | GRP78_HUMAN         | 72 kDa  | 100% |
| 21       | 14-3-3 protein zeta/delta OS=Homo sapiens GN=YWHAZ PE=1 SV=1                          | 1433Z_HUMAN         | 28 kDa  | 100% |
| 22       | NEDD8 OS=Homo sapiens GN=NEDD8 PE=1 SV=1                                              | NEDD8_HUMAN         | 9 kDa   | 100% |
| 23       | Translational activator GCN1 OS=Homo sapiens GN=GCN1L1 PE=1 SV=6                      | GCN1L_HUMAN         | 293 kDa | 100% |
| 24       | Nuclease-sensitive element-binding protein 1 OS=Homo sapiens GN=YBX1 PE=1 SV=3        | YBOX1_HUMAN<br>(+2) | 36 kDa  | 99%  |
| 25       | Leucine-rich repeat-containing protein 59 OS=Homo sapiens GN=LRRC59 PE=1 SV=1         | LRC59_HUMAN         | 35 kDa  | 99%  |
| 26       | Peptidyl-prolyl cis-trans isomerase FKBP4 OS=Homo sapiens GN=FKBP4 PE=1 SV=3          | FKBP4_HUMAN         | 52 kDa  | 100% |
| 27       | 60 kDa heat shock protein, mitochondrial OS=Homo sapiens GN=HSPD1 PE=1 SV=2           | CH60_HUMAN          | 61 kDa  | 100% |
| 28       | Chromobox protein homolog 3 OS=Homo sapiens GN=CBX3 PE=1 SV=4                         | CBX3_HUMAN          | 21 kDa  | 100% |
| 29       | Heterogeneous nuclear ribonucleoprotein H OS=Homo sapiens GN=HNRNPH1 PE=1 SV=4        | HNRH1_HUMAN         | 49 kDa  | 100% |
| 30       | Heat shock protein HSP 90-alpha OS=Homo sapiens GN=HSP90AA1 PE=1 SV=5                 | HS90A_HUMAN         | 85 kDa  | 100% |
| 31       | Cathepsin D OS=Homo sapiens GN=CTSD PE=1 SV=1                                         | CATD_HUMAN          | 45 kDa  | 100% |
| 32       | Heterogeneous nuclear ribonucleoproteins A2/B1 OS=Homo sapiens GN=HNRNPA2B1 PE=1 SV=2 | ROA2_HUMAN          | 37 kDa  | 100% |

|     |                                                                                                                   |                  |         |      |
|-----|-------------------------------------------------------------------------------------------------------------------|------------------|---------|------|
| 33  | Gelsolin OS=Homo sapiens GN=GSN PE=1 SV=1                                                                         | GELS_HUMAN       | 86 kDa  | 99%  |
| 34  | 60S ribosomal protein L10 OS=Homo sapiens GN=RPL10 PE=1 SV=4                                                      | RL10_HUMAN       | 25 kDa  | 95%  |
| 35  | Annexin A2 OS=Homo sapiens GN=ANXA2 PE=1 SV=2                                                                     | ANXA2_HUMAN      | 39 kDa  | 100% |
| 36  | Calnexin OS=Homo sapiens GN=CANX PE=1 SV=2                                                                        | CALX_HUMAN       | 68 kDa  | 100% |
| 37  | Keratin, type I cytoskeletal 19 OS=Homo sapiens GN=KRT19 PE=1 SV=4                                                | K1C19_HUMAN      | 44 kDa  | 100% |
| 38  | Heat shock protein HSP 90-beta OS=Homo sapiens GN=HSP90AB1 PE=1 SV=4                                              | HS90B_HUMAN      | 83 kDa  | 100% |
| 39  | Eukaryotic translation initiation factor 2 subunit 2 OS=Homo sapiens GN=EIF2S2 PE=1 SV=2                          | IF2B_HUMAN       | 38 kDa  | 100% |
| 40  | Serine/arginine-rich splicing factor 3 OS=Homo sapiens GN=SRSF3 PE=1 SV=1                                         | SRSF3_HUMAN (+1) | 19 kDa  | 96%  |
| 41  | Putative pre-mRNA-splicing factor ATP-dependent RNA helicase DHX15 OS=Homo sapiens GN=DHX15 PE=1 SV=2             | DHX15_HUMAN      | 91 kDa  | 100% |
| 42  | ATP-dependent RNA helicase A OS=Homo sapiens GN=DHX9 PE=1 SV=4                                                    | DHX9_HUMAN       | 141 kDa | 100% |
| 43  | 40S ribosomal protein S7 OS=Homo sapiens GN=RPS7 PE=1 SV=1                                                        | RS7_HUMAN        | 22 kDa  | 99%  |
| 44  | Plasminogen activator inhibitor 1 RNA-binding protein OS=Homo sapiens GN=SERBP1 PE=1 SV=2                         | PAIRB_HUMAN      | 45 kDa  | 99%  |
| 45  | Protein SET OS=Homo sapiens GN=SET PE=1 SV=3                                                                      | SET_HUMAN        | 33 kDa  | 100% |
| 46  | PRKC apoptosis WT1 regulator protein OS=Homo sapiens GN=PAWR PE=1 SV=1                                            | PAWR_HUMAN       | 37 kDa  | 100% |
| 47  | 60S acidic ribosomal protein P2 OS=Homo sapiens GN=RPLP2 PE=1 SV=1                                                | RLA2_HUMAN       | 12 kDa  | 100% |
| 48  | Cluster of Protein arginine N-methyltransferase 8 OS=Homo sapiens GN=PRMT8 PE=1 SV=2 (ANM8_HUMAN)                 | ANM8_HUMAN [2]   | 45 kDa  | 100% |
| 48. | Protein arginine N-methyltransferase 1 OS=Homo sapiens GN=PRMT1 PE=1 SV=2                                         | ANM1_HUMAN       | 42 kDa  | 91%  |
| 2   |                                                                                                                   |                  |         |      |
| 49  | Protein disulfide-isomerase A6 OS=Homo sapiens GN=PDIA6 PE=1 SV=1                                                 | PDIA6_HUMAN      | 48 kDa  | 100% |
| 50  | Bifunctional purine biosynthesis protein PURH OS=Homo sapiens GN=ATIC PE=1 SV=3                                   | PUR9_HUMAN       | 65 kDa  | 100% |
| 51  | Cluster of Sodium/potassium-transporting ATPase subunit alpha-1 OS=Homo sapiens GN=ATP1A1 PE=1 SV=1 (AT1A1_HUMAN) | AT1A1_HUMAN [2]  | 113 kDa | 100% |
| 52  | Thioredoxin OS=Homo sapiens GN=TXN PE=1 SV=3                                                                      | THIO_HUMAN       | 12 kDa  | 99%  |
| 53  | Hematological and neurological expressed 1 protein OS=Homo sapiens GN=HN1 PE=1 SV=3                               | HN1_HUMAN        | 16 kDa  | 99%  |
| 54  | Complement component 1 Q subcomponent-binding protein, mitochondrial OS=Homo sapiens GN=C1QBP PE=1 SV=1           | C1QBP_HUMAN      | 31 kDa  | 100% |
| 55  | X-ray repair cross-complementing protein 6 OS=Homo sapiens GN=XRCC6 PE=1 SV=2                                     | XRCC6_HUMAN      | 70 kDa  | 100% |
| 56  | Myoferlin OS=Homo sapiens GN=MYOF PE=1 SV=1                                                                       | MYOF_HUMAN       | 235 kDa | 100% |

|    |                                                                                                   |                  |         |      |
|----|---------------------------------------------------------------------------------------------------|------------------|---------|------|
| 57 | L-lactate dehydrogenase A chain OS=Homo sapiens GN=LDHA PE=1 SV=2                                 | LDHA_HUMAN       | 37 kDa  | 99%  |
| 58 | Neuron navigator 1 OS=Homo sapiens GN=NAV1 PE=1 SV=2                                              | NAV1_HUMAN       | 202 kDa | 99%  |
| 59 | Plectin OS=Homo sapiens GN=PLEC PE=1 SV=3                                                         | PLEC_HUMAN       | 532 kDa | 100% |
| 60 | SUMO-activating enzyme subunit 2 OS=Homo sapiens GN=UBA2 PE=1 SV=2                                | SAE2_HUMAN       | 71 kDa  | 100% |
| 61 | 40S ribosomal protein S3 OS=Homo sapiens GN=RPS3 PE=1 SV=2                                        | RS3_HUMAN        | 27 kDa  | 100% |
| 62 | Actin-related protein 3 OS=Homo sapiens GN=ACTR3 PE=1 SV=3                                        | ARP3_HUMAN       | 47 kDa  | 100% |
| 63 | Heterogeneous nuclear ribonucleoprotein A1-like 2 OS=Homo sapiens GN=HNRNPA1L2 PE=2 SV=2          | RA1L2_HUMAN (+1) | 34 kDa  | 100% |
| 64 | Bifunctional 3'-phosphoadenosine 5'-phosphosulfate synthase 2 OS=Homo sapiens GN=PAPSS2 PE=1 SV=2 | PAPS2_HUMAN      | 70 kDa  | 100% |
| 65 | Triosephosphate isomerase OS=Homo sapiens GN=TPI1 PE=1 SV=3                                       | TPIS_HUMAN       | 31 kDa  | 100% |
| 66 | Ubiquitin-like modifier-activating enzyme 1 OS=Homo sapiens GN=UBA1 PE=1 SV=3                     | UBA1_HUMAN       | 118 kDa | 100% |
| 67 | Calmodulin OS=Homo sapiens GN=CALM1 PE=1 SV=2                                                     | CALM_HUMAN       | 17 kDa  | 100% |
| 68 | Na(+)/H(+) exchange regulatory cofactor NHE-RF1 OS=Homo sapiens GN=SLC9A3R1 PE=1 SV=4             | NHRF1_HUMAN      | 39 kDa  | 100% |
| 69 | Exportin-2 OS=Homo sapiens GN=CSE1L PE=1 SV=3                                                     | XPO2_HUMAN       | 110 kDa | 100% |
| 70 | Isocitrate dehydrogenase [NADP], mitochondrial OS=Homo sapiens GN=IDH2 PE=1 SV=2                  | IDHP_HUMAN       | 51 kDa  | 100% |
| 71 | Serrate RNA effector molecule homolog OS=Homo sapiens GN=SRRT PE=1 SV=1                           | SRRT_HUMAN       | 101 kDa | 100% |
| 72 | Apolipoprotein B-100 OS=Homo sapiens GN=APOB PE=1 SV=2                                            | APOB_HUMAN       | 516 kDa | 100% |
| 73 | Serine/arginine-rich splicing factor 5 OS=Homo sapiens GN=SRSF5 PE=1 SV=1                         | SRSF5_HUMAN      | 31 kDa  | 99%  |
| 74 | Small nuclear ribonucleoprotein E OS=Homo sapiens GN=SNRPE PE=1 SV=1                              | RUXE_HUMAN       | 11 kDa  | 97%  |
| 75 | 14-3-3 protein gamma OS=Homo sapiens GN=YWHAG PE=1 SV=2                                           | 1433G_HUMAN      | 28 kDa  | 100% |
| 76 | Putative tropomyosin alpha-3 chain-like protein OS=Homo sapiens PE=5 SV=2                         | TPM3L_HUMAN      | 26 kDa  | 100% |
| 77 | Protein disulfide-isomerase OS=Homo sapiens GN=P4HB PE=1 SV=3                                     | PDIA1_HUMAN      | 57 kDa  | 99%  |
| 78 | Sorting nexin-3 OS=Homo sapiens GN=SNX3 PE=1 SV=3                                                 | SNX3_HUMAN       | 19 kDa  | 99%  |
| 79 | Proliferating cell nuclear antigen OS=Homo sapiens GN=PCNA PE=1 SV=1                              | PCNA_HUMAN       | 29 kDa  | 99%  |
| 80 | Heterogeneous nuclear ribonucleoprotein Q OS=Homo sapiens GN=SYNCRIP PE=1 SV=2                    | HNRPQ_HUMAN      | 70 kDa  | 100% |
| 81 | Staphylococcal nuclease domain-containing protein 1 OS=Homo sapiens GN=SND1 PE=1 SV=1             | SND1_HUMAN       | 102 kDa | 100% |
| 82 | 40S ribosomal protein S17-like OS=Homo sapiens GN=RPS17L PE=2 SV=1                                | RS17L_HUMAN (+1) | 16 kDa  | 100% |

|     |                                                                                                            |                  |         |      |
|-----|------------------------------------------------------------------------------------------------------------|------------------|---------|------|
| 83  | SUMO-activating enzyme subunit 1 OS=Homo sapiens GN=SAE1 PE=1 SV=1                                         | SAE1_HUMAN       | 38 kDa  | 99%  |
| 84  | Cytosol aminopeptidase OS=Homo sapiens GN=LAP3 PE=1 SV=3                                                   | AMPL_HUMAN       | 56 kDa  | 99%  |
| 85  | Heat shock protein beta-8 OS=Homo sapiens GN=HSPB8 PE=1 SV=1                                               | HSPB8_HUMAN      | 22 kDa  | 98%  |
| 86  | A-kinase anchor protein 8-like OS=Homo sapiens GN=AKAP8L PE=1 SV=3                                         | AKP8L_HUMAN      | 72 kDa  | 98%  |
| 87  | ATP-dependent RNA helicase DDX39A OS=Homo sapiens GN=DDX39A PE=1 SV=2                                      | DX39A_HUMAN (+1) | 49 kDa  | 97%  |
| 88  | Basic leucine zipper and W2 domain-containing protein 2 OS=Homo sapiens GN=BZW2 PE=1 SV=1                  | BZW2_HUMAN       | 48 kDa  | 96%  |
| 89  | Postacrosomal sheath WW domain-binding protein OS=Homo sapiens GN=WBP2NL PE=2 SV=1                         | WBP2L_HUMAN      | 32 kDa  | 91%  |
| 90  | Dolichyl-diphosphooligosaccharide--protein glycosyltransferase subunit 1 OS=Homo sapiens GN=RPN1 PE=1 SV=1 | RPN1_HUMAN       | 69 kDa  | 100% |
| 91  | 14-3-3 protein eta OS=Homo sapiens GN=YWHAH PE=1 SV=4                                                      | 1433F_HUMAN      | 28 kDa  | 100% |
| 92  | Vesicular integral-membrane protein VIP36 OS=Homo sapiens GN=LMAN2 PE=1 SV=1                               | LMAN2_HUMAN      | 40 kDa  | 100% |
| 93  | Chloride intracellular channel protein 1 OS=Homo sapiens GN=CLIC1 PE=1 SV=4                                | CLIC1_HUMAN      | 27 kDa  | 99%  |
| 94  | Glutaredoxin-3 OS=Homo sapiens GN=GLRX3 PE=1 SV=2                                                          | GLRX3_HUMAN      | 37 kDa  | 99%  |
| 95  | Glutamine--fructose-6-phosphate aminotransferase [isomerizing] 1 OS=Homo sapiens GN=GFPT1 PE=1 SV=3        | GFPT1_HUMAN      | 79 kDa  | 99%  |
| 96  | Heterogeneous nuclear ribonucleoprotein A3 OS=Homo sapiens GN=HNRNPA3 PE=1 SV=2                            | ROA3_HUMAN       | 40 kDa  | 99%  |
| 97  | Peroxisredoxin-5, mitochondrial OS=Homo sapiens GN=PRDX5 PE=1 SV=4                                         | PRDX5_HUMAN      | 22 kDa  | 99%  |
| 98  | Splicing factor 3B subunit 3 OS=Homo sapiens GN=SF3B3 PE=1 SV=4                                            | SF3B3_HUMAN      | 136 kDa | 99%  |
| 99  | Stathmin OS=Homo sapiens GN=STMN1 PE=1 SV=3                                                                | STMN1_HUMAN      | 17 kDa  | 99%  |
| 100 | Lamin-B1 OS=Homo sapiens GN=LMNB1 PE=1 SV=2                                                                | LMNB1_HUMAN      | 66 kDa  | 98%  |
| 101 | Kynurenine 3-monoxygenase OS=Homo sapiens GN=KMO PE=1 SV=2                                                 | KMO_HUMAN        | 56 kDa  | 91%  |
| 102 | DBIRD complex subunit KIAA1967 OS=Homo sapiens GN=KIAA1967 PE=1 SV=2                                       | K1967_HUMAN      | 103 kDa | 100% |
| 103 | DNA replication licensing factor MCM3 OS=Homo sapiens GN=MCM3 PE=1 SV=3                                    | MCM3_HUMAN       | 91 kDa  | 100% |
| 104 | F-actin-capping protein subunit alpha-1 OS=Homo sapiens GN=CAPZA1 PE=1 SV=3                                | CAZA1_HUMAN      | 33 kDa  | 100% |
| 105 | Calpain-1 catalytic subunit OS=Homo sapiens GN=CAPN1 PE=1 SV=1                                             | CAN1_HUMAN       | 82 kDa  | 100% |
| 106 | Interleukin enhancer-binding factor 3 OS=Homo sapiens GN=ILF3 PE=1 SV=3                                    | ILF3_HUMAN       | 95 kDa  | 100% |
| 107 | Myristoylated alanine-rich C-kinase substrate OS=Homo sapiens GN=MARCKS PE=1 SV=4                          | MARCS_HUMAN      | 32 kDa  | 100% |
| 108 | Calcium-regulated heat stable protein 1 OS=Homo sapiens GN=CARHSP1 PE=1 SV=2                               | CHSP1_HUMAN      | 16 kDa  | 100% |

|     |                                                                                              |             |         |      |
|-----|----------------------------------------------------------------------------------------------|-------------|---------|------|
| 109 | 40S ribosomal protein S3a OS=Homo sapiens GN=RPS3A PE=1 SV=2                                 | RS3A_HUMAN  | 30 kDa  | 100% |
| 110 | 14-3-3 protein epsilon OS=Homo sapiens GN=YWHAE PE=1 SV=1                                    | 1433E_HUMAN | 29 kDa  | 100% |
| 111 | Bola-like protein 2 OS=Homo sapiens GN=BOLA2 PE=1 SV=1                                       | BOLA2_HUMAN | 10 kDa  | 99%  |
| 112 | 40S ribosomal protein S14 OS=Homo sapiens GN=RPS14 PE=1 SV=3                                 | RS14_HUMAN  | 16 kDa  | 99%  |
| 113 | Stomatin-like protein 2, mitochondrial OS=Homo sapiens GN=STOML2 PE=1 SV=1                   | STML2_HUMAN | 39 kDa  | 99%  |
| 114 | Hypoxia up-regulated protein 1 OS=Homo sapiens GN=HYOU1 PE=1 SV=1                            | HYOU1_HUMAN | 111 kDa | 99%  |
| 115 | Heterogeneous nuclear ribonucleoprotein A/B OS=Homo sapiens GN=HNRNPAB PE=1 SV=2             | ROAA_HUMAN  | 36 kDa  | 99%  |
| 116 | Eukaryotic translation initiation factor 4 gamma 1 OS=Homo sapiens GN=EIF4G1 PE=1 SV=4       | IF4G1_HUMAN | 175 kDa | 99%  |
| 117 | Opioid growth factor receptor OS=Homo sapiens GN=OGFR PE=1 SV=3                              | OGFR_HUMAN  | 73 kDa  | 100% |
| 118 | Leucine-rich PPR motif-containing protein, mitochondrial OS=Homo sapiens GN=LRPPRC PE=1 SV=3 | LPPRC_HUMAN | 158 kDa | 100% |
| 119 | N-alpha-acetyltransferase 10 OS=Homo sapiens GN=NAA10 PE=1 SV=1                              | NAA10_HUMAN | 26 kDa  | 100% |
| 120 | DNA ligase 1 OS=Homo sapiens GN=LIG1 PE=1 SV=1                                               | DNLI1_HUMAN | 102 kDa | 100% |
| 121 | Golgi to ER traffic protein 4 homolog OS=Homo sapiens GN=GET4 PE=1 SV=1                      | GET4_HUMAN  | 37 kDa  | 99%  |
| 122 | PCTP-like protein OS=Homo sapiens GN=STARD10 PE=1 SV=2                                       | PCTL_HUMAN  | 33 kDa  | 99%  |
| 123 | Neutral alpha-glucosidase AB OS=Homo sapiens GN=GANAB PE=1 SV=3                              | GANAB_HUMAN | 107 kDa | 99%  |
| 124 | Collagen alpha-1(I) chain OS=Homo sapiens GN=COL1A1 PE=1 SV=5                                | CO1A1_HUMAN | 139 kDa | 99%  |
| 125 | Endoplasmin OS=Homo sapiens GN=HSP90B1 PE=1 SV=1                                             | ENPL_HUMAN  | 92 kDa  | 98%  |
| 126 | Transformer-2 protein homolog beta OS=Homo sapiens GN=TRA2B PE=1 SV=1                        | TRA2B_HUMAN | 34 kDa  | 96%  |
| 127 | DNA-(apurinic or apyrimidinic site) lyase OS=Homo sapiens GN=APEX1 PE=1 SV=2                 | APEX1_HUMAN | 36 kDa  | 99%  |
| 128 | Uncharacterized protein C7orf50 OS=Homo sapiens GN=C7orf50 PE=1 SV=1                         | CG050_HUMAN | 22 kDa  | 99%  |
| 129 | Nuclear autoantigenic sperm protein OS=Homo sapiens GN=NASP PE=1 SV=2                        | NASP_HUMAN  | 85 kDa  | 99%  |
| 130 | T-complex protein 1 subunit beta OS=Homo sapiens GN=CCT2 PE=1 SV=4                           | TCPB_HUMAN  | 57 kDa  | 99%  |
| 131 | UBX domain-containing protein 1 OS=Homo sapiens GN=UBXN1 PE=1 SV=2                           | UBXN1_HUMAN | 33 kDa  | 99%  |
| 132 | Cytochrome b-c1 complex subunit 7 OS=Homo sapiens GN=UQCRB PE=1 SV=2                         | QCR7_HUMAN  | 14 kDa  | 99%  |
| 133 | Glycogen phosphorylase, brain form OS=Homo sapiens GN=PYGB PE=1 SV=5                         | PYGB_HUMAN  | 97 kDa  | 99%  |
| 134 | 14-3-3 protein sigma OS=Homo sapiens GN=SFN PE=1 SV=1                                        | 1433S_HUMAN | 28 kDa  | 99%  |

|     |                                                                                                  |                 |         |      |
|-----|--------------------------------------------------------------------------------------------------|-----------------|---------|------|
| 135 | Myosin-10 OS=Homo sapiens GN=MYH10 PE=1 SV=3                                                     | MYH10_HUMAN     | 229 kDa | 99%  |
| 136 | Gem-associated protein 5 OS=Homo sapiens GN=GEMIN5 PE=1 SV=3                                     | GEM15_HUMAN     | 169 kDa | 98%  |
| 137 | Cell division control protein 42 homolog OS=Homo sapiens GN=CDC42 PE=1 SV=2                      | CDC42_HUMAN     | 21 kDa  | 95%  |
| 138 | Fragile X mental retardation syndrome-related protein 1 OS=Homo sapiens GN=FXR1 PE=1 SV=3        | FXR1_HUMAN      | 70 kDa  | 100% |
| 139 | A-kinase anchor protein 8 OS=Homo sapiens GN=AKAP8 PE=1 SV=1                                     | AKAP8_HUMAN     | 76 kDa  | 99%  |
| 140 | Platelet-activating factor acetylhydrolase IB subunit alpha OS=Homo sapiens GN=PFAH1B1 PE=1 SV=2 | LIS1_HUMAN      | 47 kDa  | 99%  |
| 141 | Prefoldin subunit 4 OS=Homo sapiens GN=PFDN4 PE=1 SV=1                                           | PFD4_HUMAN      | 15 kDa  | 99%  |
| 142 | Sorting nexin-6 OS=Homo sapiens GN=SNX6 PE=1 SV=1                                                | SNX6_HUMAN      | 47 kDa  | 99%  |
| 143 | 6-phosphofruktokinase type C OS=Homo sapiens GN=PFBK PE=1 SV=2                                   | K6PP_HUMAN      | 86 kDa  | 99%  |
| 144 | Membrane-associated progesterone receptor component 1 OS=Homo sapiens GN=PGRMC1 PE=1 SV=3        | PGRC1_HUMAN     | 22 kDa  | 99%  |
| 145 | Large proline-rich protein BAG6 OS=Homo sapiens GN=BAG6 PE=1 SV=2                                | BAG6_HUMAN      | 119 kDa | 99%  |
| 146 | Glucosidase 2 subunit beta OS=Homo sapiens GN=PRKCSH PE=1 SV=2                                   | GLU2B_HUMAN     | 59 kDa  | 98%  |
| 147 | Eukaryotic translation initiation factor 5A-1 OS=Homo sapiens GN=EIF5A PE=1 SV=2                 | IF5A1_HUMAN     | 17 kDa  | 98%  |
| 148 | Semaphorin-4C OS=Homo sapiens GN=SEMA4C PE=2 SV=2                                                | SEM4C_HUMAN     | 93 kDa  | 98%  |
| 149 | 26S proteasome non-ATPase regulatory subunit 6 OS=Homo sapiens GN=PSMD6 PE=1 SV=1                | PSMD6_HUMAN     | 46 kDa  | 98%  |
| 150 | Clathrin heavy chain 1 OS=Homo sapiens GN=CLTC PE=1 SV=5                                         | CLH1_HUMAN      | 192 kDa | 98%  |
| 151 | Protein FAM162A OS=Homo sapiens GN=FAM162A PE=1 SV=2                                             | F162A_HUMAN     | 17 kDa  | 97%  |
| 152 | Dual specificity mitogen-activated protein kinase kinase 2 OS=Homo sapiens GN=MAP2K2 PE=1 SV=1   | MP2K2_HUMAN     | 44 kDa  | 94%  |
| 153 | Ribonuclease inhibitor OS=Homo sapiens GN=RNH1 PE=1 SV=2                                         | RINI_HUMAN      | 50 kDa  | 94%  |
| 154 | ATP synthase subunit e, mitochondrial OS=Homo sapiens GN=ATP5I PE=1 SV=2                         | ATP5I_HUMAN     | 8 kDa   | 93%  |
| 155 | Histone H2A.V OS=Homo sapiens GN=H2AFV PE=1 SV=3                                                 | H2AV_HUMAN (+1) | 14 kDa  | 93%  |
| 156 | Coiled-coil domain-containing protein 90B, mitochondrial OS=Homo sapiens GN=CCDC90B PE=1 SV=2    | CC90B_HUMAN     | 30 kDa  | 92%  |
| 157 | 26S proteasome non-ATPase regulatory subunit 2 OS=Homo sapiens GN=PSMD2 PE=1 SV=3                | PSMD2_HUMAN     | 100 kDa | 99%  |
| 158 | Transcription activator BRG1 OS=Homo sapiens GN=SMARCA4 PE=1 SV=2                                | SMCA4_HUMAN     | 185 kDa | 99%  |
| 159 | Gamma-taxilin OS=Homo sapiens GN=TXLNG PE=1 SV=2                                                 | TXLNG_HUMAN     | 61 kDa  | 99%  |
| 160 | Transcription elongation factor B polypeptide 2 OS=Homo sapiens GN=TCEB2 PE=1 SV=1               | ELOB_HUMAN      | 13 kDa  | 97%  |



|     |                                                                                                |                     |         |      |
|-----|------------------------------------------------------------------------------------------------|---------------------|---------|------|
| 161 | Drebrin-like protein OS=Homo sapiens GN=DBNL PE=1 SV=1                                         | DBNL_HUMAN          | 48 kDa  | 96%  |
| 162 | CD2 antigen cytoplasmic tail-binding protein 2 OS=Homo sapiens GN=CD2BP2 PE=1 SV=1             | CD2B2_HUMAN         | 38 kDa  | 95%  |
| 163 | Lon protease homolog, mitochondrial OS=Homo sapiens GN=LONP1 PE=1 SV=2                         | LONM_HUMAN          | 106 kDa | 94%  |
| 164 | Eukaryotic translation initiation factor 6 OS=Homo sapiens GN=EIF6 PE=1 SV=1                   | IF6_HUMAN           | 27 kDa  | 94%  |
| 165 | Prolactin regulatory element-binding protein OS=Homo sapiens GN=PREB PE=1 SV=2                 | PREB_HUMAN          | 45 kDa  | 94%  |
| 166 | GrpE protein homolog 1, mitochondrial OS=Homo sapiens GN=GRPEL1 PE=1 SV=2                      | GRPE1_HUMAN         | 24 kDa  | 94%  |
| 167 | ATP synthase subunit gamma, mitochondrial OS=Homo sapiens GN=ATP5C1 PE=1 SV=1                  | ATPG_HUMAN          | 33 kDa  | 94%  |
| 168 | Nuclear cap-binding protein subunit 1 OS=Homo sapiens GN=NCBP1 PE=1 SV=1                       | NCBP1_HUMAN         | 92 kDa  | 93%  |
| 169 | 39S ribosomal protein L41, mitochondrial OS=Homo sapiens GN=MRPL41 PE=1 SV=1                   | RM41_HUMAN          | 15 kDa  | 93%  |
| 170 | WASH complex subunit FAM21A OS=Homo sapiens GN=FAM21A PE=2 SV=3                                | FA21A_HUMAN (+2)    | 147 kDa | 92%  |
| 171 | Prelamin-A/C OS=Homo sapiens GN=LMNA PE=1 SV=1                                                 | LMNA_HUMAN          | 74 kDa  | 92%  |
| 172 | Fructose-bisphosphate aldolase A OS=Homo sapiens GN=ALDOA PE=1 SV=2                            | ALDOA_HUMAN         | 39 kDa  | 92%  |
| 173 | Microtubule-associated protein tau OS=Homo sapiens GN=MAPT PE=1 SV=5                           | TAU_HUMAN           | 79 kDa  | 92%  |
| 174 | Nucleophosmin OS=Homo sapiens GN=NPM1 PE=1 SV=2                                                | NPM_HUMAN           | 33 kDa  | 92%  |
| 175 | 1,2-dihydroxy-3-keto-5-methylthiopentene dioxygenase OS=Homo sapiens GN=ADII PE=1 SV=1         | MTND_HUMAN          | 21 kDa  | 91%  |
| 176 | Sorting and assembly machinery component 50 homolog OS=Homo sapiens GN=SAMM50 PE=1 SV=3        | SAM50_HUMAN         | 52 kDa  | 91%  |
| 177 | Neuroblast differentiation-associated protein AHNAK OS=Homo sapiens GN=AHNAK PE=1 SV=2         | AHNAK_HUMAN         | 629 kDa | 100% |
| 178 | Cluster of Heat shock protein HSP 90-alpha OS=Homo sapiens GN=HSP90AA1 PE=1 SV=5 (HS90A_HUMAN) | HS90A_HUMAN [3]     | 85 kDa  | 100% |
| 179 | Keratin, type II cytoskeletal 8 OS=Homo sapiens GN=KRT8 PE=1 SV=7                              | K2C8_HUMAN          | 54 kDa  | 100% |
| 180 | Cluster of Heat shock 70 kDa protein 1A/1B OS=Homo sapiens GN=HSPA1A PE=1 SV=5 (HSP71_HUMAN)   | HSP71_HUMAN [2]     | 70 kDa  | 100% |
| 181 | Cluster of Tubulin beta chain OS=Homo sapiens GN=TUBB PE=1 SV=2 (TBB5_HUMAN)                   | TBB5_HUMAN [4]      | 50 kDa  | 100% |
| 182 | Cluster of Alpha-actinin-4 OS=Homo sapiens GN=ACTN4 PE=1 SV=2 (ACTN4_HUMAN)                    | ACTN4_HUMAN [3]     | 105 kDa | 100% |
| 183 | Keratin, type I cytoskeletal 18 OS=Homo sapiens GN=KRT18 PE=1 SV=2                             | K1C18_HUMAN         | 48 kDa  | 100% |
| 184 | Tubulin alpha-1A chain OS=Homo sapiens GN=TUBA1A PE=1 SV=1                                     | TBA1A_HUMAN<br>(+2) | 50 kDa  | 100% |
| 185 | Cluster of Actin, cytoplasmic 1 OS=Homo sapiens GN=ACTB PE=1 SV=1 (ACTB_HUMAN)                 | ACTB_HUMAN [6]      | 42 kDa  | 100% |

|     |                                                                                       |                |         |      |
|-----|---------------------------------------------------------------------------------------|----------------|---------|------|
| 186 | Cluster of Tropomyosin alpha-4 chain OS=Homo sapiens GN=TPM4 PE=1 SV=3 (TPM4_HUMAN)   | TPM4_HUMAN [3] | 29 kDa  | 100% |
| 187 | Myosin-9 OS=Homo sapiens GN=MYH9 PE=1 SV=4                                            | MYH9_HUMAN     | 227 kDa | 100% |
| 188 | 14-3-3 protein zeta/delta OS=Homo sapiens GN=YWHAZ PE=1 SV=1                          | 1433Z_HUMAN    | 28 kDa  | 100% |
| 189 | Calnexin OS=Homo sapiens GN=CANX PE=1 SV=2                                            | CALX_HUMAN     | 68 kDa  | 100% |
| 190 | Cluster of Clathrin heavy chain 1 OS=Homo sapiens GN=CLTC PE=1 SV=5 (CLH1_HUMAN)      | CLH1_HUMAN [2] | 192 kDa | 100% |
| 191 | Profilin-1 OS=Homo sapiens GN=PFN1 PE=1 SV=2                                          | PROF1_HUMAN    | 15 kDa  | 99%  |
| 192 | Protein SEC13 homolog OS=Homo sapiens GN=SEC13 PE=1 SV=3                              | SEC13_HUMAN    | 36 kDa  | 99%  |
| 193 | 78 kDa glucose-regulated protein OS=Homo sapiens GN=HSPA5 PE=1 SV=2                   | GRP78_HUMAN    | 72 kDa  | 100% |
| 194 | 60 kDa heat shock protein, mitochondrial OS=Homo sapiens GN=HSPD1 PE=1 SV=2           | CH60_HUMAN     | 61 kDa  | 100% |
| 195 | Pyruvate kinase isozymes M1/M2 OS=Homo sapiens GN=PKM PE=1 SV=4                       | KPYM_HUMAN     | 58 kDa  | 100% |
| 196 | Alpha-enolase OS=Homo sapiens GN=ENO1 PE=1 SV=2                                       | ENOA_HUMAN     | 47 kDa  | 100% |
| 197 | Nucleolin OS=Homo sapiens GN=NCL PE=1 SV=3                                            | NUCL_HUMAN     | 77 kDa  | 100% |
| 198 | Myosin-14 OS=Homo sapiens GN=MYH14 PE=1 SV=2                                          | MYH14_HUMAN    | 228 kDa | 100% |
| 199 | Protein disulfide-isomerase OS=Homo sapiens GN=P4HB PE=1 SV=3                         | PDIA1_HUMAN    | 57 kDa  | 100% |
| 200 | Dipeptidyl peptidase 3 OS=Homo sapiens GN=DPP3 PE=1 SV=2                              | DPP3_HUMAN     | 83 kDa  | 99%  |
| 201 | Staphylococcal nuclease domain-containing protein 1 OS=Homo sapiens GN=SND1 PE=1 SV=1 | SND1_HUMAN     | 102 kDa | 100% |
| 202 | DNA-dependent protein kinase catalytic subunit OS=Homo sapiens GN=PRKDC PE=1 SV=3     | PRKDC_HUMAN    | 469 kDa | 100% |
| 203 | Filamin-A OS=Homo sapiens GN=FLNA PE=1 SV=4                                           | FLNA_HUMAN     | 281 kDa | 100% |
| 204 | Plectin OS=Homo sapiens GN=PLEC PE=1 SV=3                                             | PLEC_HUMAN     | 532 kDa | 100% |
| 205 | Fructose-bisphosphate aldolase C OS=Homo sapiens GN=ALDOC PE=1 SV=2                   | ALDOC_HUMAN    | 39 kDa  | 100% |
| 206 | Partner of Y14 and mago OS=Homo sapiens GN=WIBG PE=1 SV=1                             | WIBG_HUMAN     | 23 kDa  | 99%  |
| 207 | Nucleophosmin OS=Homo sapiens GN=NPM1 PE=1 SV=2                                       | NPM_HUMAN      | 33 kDa  | 100% |
| 208 | Peptidyl-prolyl cis-trans isomerase FKBP4 OS=Homo sapiens GN=FKBP4 PE=1 SV=3          | FKBP4_HUMAN    | 52 kDa  | 100% |
| 209 | Transcription intermediary factor 1-beta OS=Homo sapiens GN=TRIM28 PE=1 SV=5          | TIF1B_HUMAN    | 89 kDa  | 100% |
| 210 | Radixin OS=Homo sapiens GN=RDX PE=1 SV=1                                              | RADI_HUMAN     | 69 kDa  | 99%  |
| 211 | Annexin A2 OS=Homo sapiens GN=ANXA2 PE=1 SV=2                                         | ANXA2_HUMAN    | 39 kDa  | 100% |

|     |                                                                                                         |             |         |      |
|-----|---------------------------------------------------------------------------------------------------------|-------------|---------|------|
| 212 | Calreticulin OS=Homo sapiens GN=CALR PE=1 SV=1                                                          | CALR_HUMAN  | 48 kDa  | 99%  |
| 213 | Thioredoxin OS=Homo sapiens GN=TXN PE=1 SV=3                                                            | THIO_HUMAN  | 12 kDa  | 100% |
| 214 | Cluster of Heat shock cognate 71 kDa protein OS=Homo sapiens GN=HSPA8 PE=1 SV=1 (HSP7C_HUMAN)           | HSP7C_HUMAN | 71 kDa  | 100% |
| 215 | SUMO-activating enzyme subunit 1 OS=Homo sapiens GN=SAE1 PE=1 SV=1                                      | SAE1_HUMAN  | 38 kDa  | 100% |
| 216 | NEDD8 OS=Homo sapiens GN=NEDD8 PE=1 SV=1                                                                | NEDD8_HUMAN | 9 kDa   | 100% |
| 217 | 60S acidic ribosomal protein P2 OS=Homo sapiens GN=RPLP2 PE=1 SV=1                                      | RLA2_HUMAN  | 12 kDa  | 100% |
| 218 | 40S ribosomal protein S3 OS=Homo sapiens GN=RPS3 PE=1 SV=2                                              | RS3_HUMAN   | 27 kDa  | 100% |
| 219 | 14-3-3 protein epsilon OS=Homo sapiens GN=YWHAE PE=1 SV=1                                               | 1433E_HUMAN | 29 kDa  | 100% |
| 220 | Bcl-2-associated transcription factor 1 OS=Homo sapiens GN=BCLAF1 PE=1 SV=2                             | BCLF1_HUMAN | 106 kDa | 100% |
| 221 | Complement component 1 Q subcomponent-binding protein, mitochondrial OS=Homo sapiens GN=C1QBP PE=1 SV=1 | C1QBP_HUMAN | 31 kDa  | 100% |
| 222 | Chromobox protein homolog 3 OS=Homo sapiens GN=CBX3 PE=1 SV=4                                           | CBX3_HUMAN  | 21 kDa  | 100% |
| 223 | Protein disulfide-isomerase A4 OS=Homo sapiens GN=PDIA4 PE=1 SV=2                                       | PDIA4_HUMAN | 73 kDa  | 100% |
| 224 | SUMO-activating enzyme subunit 2 OS=Homo sapiens GN=UBA2 PE=1 SV=2                                      | SAE2_HUMAN  | 71 kDa  | 100% |
| 225 | Protein unc-45 homolog A OS=Homo sapiens GN=UNC45A PE=1 SV=1                                            | UN45A_HUMAN | 103 kDa | 100% |
| 226 | Heterogeneous nuclear ribonucleoprotein Q OS=Homo sapiens GN=SYNCRIP PE=1 SV=2                          | HNRPQ_HUMAN | 70 kDa  | 100% |
| 227 | Prelamin-A/C OS=Homo sapiens GN=LMNA PE=1 SV=1                                                          | LMNA_HUMAN  | 74 kDa  | 100% |
| 228 | Serine/arginine-rich splicing factor 5 OS=Homo sapiens GN=SRSF5 PE=1 SV=1                               | SRSF5_HUMAN | 31 kDa  | 99%  |
| 229 | 26S proteasome non-ATPase regulatory subunit 11 OS=Homo sapiens GN=PSMD11 PE=1 SV=3                     | PSD11_HUMAN | 47 kDa  | 100% |
| 230 | 6-phosphogluconate dehydrogenase, decarboxylating OS=Homo sapiens GN=PGD PE=1 SV=3                      | 6PGD_HUMAN  | 53 kDa  | 100% |
| 231 | Myoferlin OS=Homo sapiens GN=MYOF PE=1 SV=1                                                             | MYOF_HUMAN  | 235 kDa | 100% |
| 232 | Protein disulfide-isomerase A6 OS=Homo sapiens GN=PDIA6 PE=1 SV=1                                       | PDIA6_HUMAN | 48 kDa  | 100% |
| 233 | Calmodulin OS=Homo sapiens GN=CALM1 PE=1 SV=2                                                           | CALM_HUMAN  | 17 kDa  | 100% |
| 234 | Cathepsin D OS=Homo sapiens GN=CTSD PE=1 SV=1                                                           | CATD_HUMAN  | 45 kDa  | 100% |
| 235 | Spectrin alpha chain, non-erythrocytic 1 OS=Homo sapiens GN=SPTAN1 PE=1 SV=3                            | SPTN1_HUMAN | 285 kDa | 100% |
| 236 | Na(+)/H(+) exchange regulatory cofactor NHE-RF1 OS=Homo sapiens GN=SLC9A3R1 PE=1 SV=4                   | NHRF1_HUMAN | 39 kDa  | 100% |
| 237 | 60S ribosomal protein L4 OS=Homo sapiens GN=RPL4 PE=1 SV=5                                              | RL4_HUMAN   | 48 kDa  | 100% |

|     |                                                                                       |             |         |      |
|-----|---------------------------------------------------------------------------------------|-------------|---------|------|
| 238 | Anterior gradient protein 2 homolog OS=Homo sapiens GN=AGR2 PE=1 SV=1                 | AGR2_HUMAN  | 20 kDa  | 99%  |
| 239 | Protein SET OS=Homo sapiens GN=SET PE=1 SV=3                                          | SET_HUMAN   | 33 kDa  | 100% |
| 240 | X-ray repair cross-complementing protein 5 OS=Homo sapiens GN=XRCC5 PE=1 SV=3         | XRCC5_HUMAN | 83 kDa  | 100% |
| 241 | Serine/arginine-rich splicing factor 2 OS=Homo sapiens GN=SRSF2 PE=1 SV=4             | SRSF2_HUMAN | 25 kDa  | 99%  |
| 242 | Proliferation-associated protein 2G4 OS=Homo sapiens GN=PA2G4 PE=1 SV=3               | PA2G4_HUMAN | 44 kDa  | 99%  |
| 243 | Ubiquitin-like modifier-activating enzyme 1 OS=Homo sapiens GN=UBA1 PE=1 SV=3         | UBA1_HUMAN  | 118 kDa | 100% |
| 244 | Lamin-B1 OS=Homo sapiens GN=LMNB1 PE=1 SV=2                                           | LMNB1_HUMAN | 66 kDa  | 100% |
| 245 | Ras GTPase-activating-like protein IQGAP1 OS=Homo sapiens GN=IQGAP1 PE=1 SV=1         | IQGA1_HUMAN | 189 kDa | 98%  |
| 246 | Src substrate cortactin OS=Homo sapiens GN=CTTN PE=1 SV=2                             | SRC8_HUMAN  | 62 kDa  | 100% |
| 247 | Cluster of Y-box-binding protein 3 OS=Homo sapiens GN=YBX3 PE=1 SV=4 (YBOX3_HUMAN)    | YBOX3_HUMAN | 40 kDa  | 99%  |
| 248 | Cold shock domain-containing protein E1 OS=Homo sapiens GN=CSDE1 PE=1 SV=2            | CSDE1_HUMAN | 89 kDa  | 100% |
| 249 | Keratin, type I cytoskeletal 19 OS=Homo sapiens GN=KRT19 PE=1 SV=4                    | K1C19_HUMAN | 44 kDa  | 100% |
| 250 | Prefoldin subunit 4 OS=Homo sapiens GN=PFDN4 PE=1 SV=1                                | PFD4_HUMAN  | 15 kDa  | 100% |
| 251 | Pre-mRNA-processing factor 40 homolog A OS=Homo sapiens GN=PRPF40A PE=1 SV=2          | PR40A_HUMAN | 109 kDa | 100% |
| 252 | Heterogeneous nuclear ribonucleoprotein A3 OS=Homo sapiens GN=HNRNPA3 PE=1 SV=2       | ROA3_HUMAN  | 40 kDa  | 100% |
| 253 | pre-rRNA processing protein FTSJ3 OS=Homo sapiens GN=FTSJ3 PE=1 SV=2                  | SPB1_HUMAN  | 97 kDa  | 100% |
| 254 | Transitional endoplasmic reticulum ATPase OS=Homo sapiens GN=VCP PE=1 SV=4            | TERA_HUMAN  | 89 kDa  | 100% |
| 255 | Filamin-B OS=Homo sapiens GN=FLNB PE=1 SV=2                                           | FLNB_HUMAN  | 278 kDa | 99%  |
| 256 | Ubiquitin-conjugating enzyme E2 variant 1 OS=Homo sapiens GN=UBE2V1 PE=1 SV=2         | UB2V1_HUMAN | 16 kDa  | 99%  |
| 257 | Fructose-bisphosphate aldolase A OS=Homo sapiens GN=ALDOA PE=1 SV=2                   | ALDOA_HUMAN | 39 kDa  | 100% |
| 258 | Heterogeneous nuclear ribonucleoproteins A2/B1 OS=Homo sapiens GN=HNRNPA2B1 PE=1 SV=2 | ROA2_HUMAN  | 37 kDa  | 99%  |
| 259 | Isocitrate dehydrogenase [NADP], mitochondrial OS=Homo sapiens GN=IDH2 PE=1 SV=2      | IDHP_HUMAN  | 51 kDa  | 100% |
| 260 | Triosephosphate isomerase OS=Homo sapiens GN=TP11 PE=1 SV=3                           | TPIS_HUMAN  | 31 kDa  | 100% |
| 261 | Ubiquitin carboxyl-terminal hydrolase 14 OS=Homo sapiens GN=USP14 PE=1 SV=3           | UBP14_HUMAN | 56 kDa  | 99%  |
| 262 | Peroxiredoxin-6 OS=Homo sapiens GN=PRDX6 PE=1 SV=3                                    | PRDX6_HUMAN | 25 kDa  | 100% |
| 263 | X-ray repair cross-complementing protein 6 OS=Homo sapiens GN=XRCC6 PE=1 SV=2         | XRCC6_HUMAN | 70 kDa  | 100% |

|     |                                                                                                       |                  |         |      |
|-----|-------------------------------------------------------------------------------------------------------|------------------|---------|------|
| 264 | 26S proteasome non-ATPase regulatory subunit 6 OS=Homo sapiens GN=PSMD6 PE=1 SV=1                     | PSMD6_HUMAN      | 46 kDa  | 100% |
| 265 | Elongation factor 2 OS=Homo sapiens GN=EEF2 PE=1 SV=4                                                 | EF2_HUMAN        | 95 kDa  | 100% |
| 266 | 40S ribosomal protein S14 OS=Homo sapiens GN=RPS14 PE=1 SV=3                                          | RS14_HUMAN       | 16 kDa  | 99%  |
| 267 | Glyceraldehyde-3-phosphate dehydrogenase OS=Homo sapiens GN=GAPDH PE=1 SV=3                           | G3P_HUMAN        | 36 kDa  | 100% |
| 268 | Putative tropomyosin alpha-3 chain-like protein OS=Homo sapiens PE=5 SV=2                             | TPM3L_HUMAN      | 26 kDa  | 100% |
| 269 | Eukaryotic translation initiation factor 2 subunit 2 OS=Homo sapiens GN=EIF2S2 PE=1 SV=2              | IF2B_HUMAN       | 38 kDa  | 100% |
| 270 | Neutral alpha-glucosidase AB OS=Homo sapiens GN=GANAB PE=1 SV=3                                       | GANAB_HUMAN      | 107 kDa | 100% |
| 271 | Heterogeneous nuclear ribonucleoproteins C1/C2 OS=Homo sapiens GN=HNRNPC PE=1 SV=4                    | HNRPC_HUMAN      | 34 kDa  | 100% |
| 272 | Peptidyl-prolyl cis-trans isomerase A OS=Homo sapiens GN=PPIA PE=1 SV=2                               | PPIA_HUMAN       | 18 kDa  | 100% |
| 273 | Putative pre-mRNA-splicing factor ATP-dependent RNA helicase DHX15 OS=Homo sapiens GN=DHX15 PE=1 SV=2 | DHX15_HUMAN      | 91 kDa  | 100% |
| 274 | Cluster of Interleukin enhancer-binding factor 3 OS=Homo sapiens GN=ILF3 PE=1 SV=3 (ILF3_HUMAN)       | ILF3_HUMAN       | 95 kDa  | 100% |
| 275 | Programmed cell death 6-interacting protein OS=Homo sapiens GN=PDCD6IP PE=1 SV=1                      | PDC6I_HUMAN      | 96 kDa  | 100% |
| 276 | Vesicle-trafficking protein SEC22b OS=Homo sapiens GN=SEC22B PE=1 SV=4                                | SC22B_HUMAN      | 25 kDa  | 93%  |
| 277 | Splicing factor 3B subunit 3 OS=Homo sapiens GN=SF3B3 PE=1 SV=4                                       | SF3B3_HUMAN      | 136 kDa | 100% |
| 278 | Fatty acid synthase OS=Homo sapiens GN=FASN PE=1 SV=3                                                 | FAS_HUMAN        | 273 kDa | 100% |
| 279 | Heterogeneous nuclear ribonucleoprotein A1-like 2 OS=Homo sapiens GN=HNRNPA1L2 PE=2 SV=2              | RA1L2_HUMAN (+1) | 34 kDa  | 100% |
| 280 | F-actin-capping protein subunit alpha-1 OS=Homo sapiens GN=CAPZA1 PE=1 SV=3                           | CAZA1_HUMAN      | 33 kDa  | 99%  |
| 281 | Eukaryotic translation initiation factor 4 gamma 1 OS=Homo sapiens GN=EIF4G1 PE=1 SV=4                | IF4G1_HUMAN      | 175 kDa | 100% |
| 282 | ATP-dependent RNA helicase A OS=Homo sapiens GN=DHX9 PE=1 SV=4                                        | DHX9_HUMAN       | 141 kDa | 100% |
| 283 | Bola-like protein 2 OS=Homo sapiens GN=BOLA2 PE=1 SV=1                                                | BOLA2_HUMAN      | 10 kDa  | 100% |
| 284 | Ubiquitin-60S ribosomal protein L40 OS=Homo sapiens GN=UBA52 PE=1 SV=2                                | RL40_HUMAN (+3)  | 15 kDa  | 99%  |
| 285 | Fragile X mental retardation syndrome-related protein 1 OS=Homo sapiens GN=FXR1 PE=1 SV=3             | FXR1_HUMAN       | 70 kDa  | 100% |
| 286 | 4F2 cell-surface antigen heavy chain OS=Homo sapiens GN=SLC3A2 PE=1 SV=3                              | 4F2_HUMAN        | 68 kDa  | 100% |
| 287 | Bifunctional purine biosynthesis protein PURH OS=Homo sapiens GN=ATIC PE=1 SV=3                       | PUR9_HUMAN       | 65 kDa  | 100% |
| 288 | C-1-tetrahydrofolate synthase, cytoplasmic OS=Homo sapiens GN=MTHFD1 PE=1 SV=3                        | C1TC_HUMAN       | 102 kDa | 100% |
| 289 | 14-3-3 protein eta OS=Homo sapiens GN=YWHAH PE=1 SV=4                                                 | 1433F_HUMAN      | 28 kDa  | 100% |

|     |                                                                                                                   |                 |         |      |
|-----|-------------------------------------------------------------------------------------------------------------------|-----------------|---------|------|
| 290 | Heat shock protein beta-1 OS=Homo sapiens GN=HSPB1 PE=1 SV=2                                                      | HSPB1_HUMAN     | 23 kDa  | 100% |
| 291 | Cluster of Sodium/potassium-transporting ATPase subunit alpha-1 OS=Homo sapiens GN=ATP1A1 PE=1 SV=1 (AT1A1_HUMAN) | AT1A1_HUMAN     | 113 kDa | 100% |
| 292 | Glycogen phosphorylase, brain form OS=Homo sapiens GN=PYGB PE=1 SV=5                                              | PYGB_HUMAN      | 97 kDa  | 100% |
| 293 | C-Jun-amino-terminal kinase-interacting protein 4 OS=Homo sapiens GN=SPAG9 PE=1 SV=4                              | JIP4_HUMAN      | 146 kDa | 100% |
| 294 | Proteasome activator complex subunit 2 OS=Homo sapiens GN=PSME2 PE=1 SV=4                                         | PSME2_HUMAN     | 27 kDa  | 100% |
| 295 | Glutaredoxin-3 OS=Homo sapiens GN=GLRX3 PE=1 SV=2                                                                 | GLRX3_HUMAN     | 37 kDa  | 100% |
| 296 | Cluster of Protein arginine N-methyltransferase 1 OS=Homo sapiens GN=PRMT1 PE=1 SV=2 (ANM1_HUMAN)                 | ANM1_HUMAN [2]  | 42 kDa  | 100% |
| 297 | Heterogeneous nuclear ribonucleoprotein K OS=Homo sapiens GN=HNRNPK PE=1 SV=1                                     | HNRNPK_HUMAN    | 51 kDa  | 99%  |
| 298 | Eukaryotic translation initiation factor 3 subunit B OS=Homo sapiens GN=EIF3B PE=1 SV=3                           | EIF3B_HUMAN     | 92 kDa  | 100% |
| 299 | 26S protease regulatory subunit 6A OS=Homo sapiens GN=PSMC3 PE=1 SV=3                                             | PRS6A_HUMAN     | 49 kDa  | 99%  |
| 300 | Cluster of Keratin, type I cytoskeletal 14 OS=Homo sapiens GN=KRT14 PE=1 SV=4 (K1C14_HUMAN)                       | K1C14_HUMAN [3] | 52 kDa  | 100% |
| 301 | Lupus La protein OS=Homo sapiens GN=SSB PE=1 SV=2                                                                 | LA_HUMAN        | 47 kDa  | 100% |
| 302 | Myristoylated alanine-rich C-kinase substrate OS=Homo sapiens GN=MARCKS PE=1 SV=4                                 | MARCS_HUMAN     | 32 kDa  | 79%  |
| 303 | UDP-glucose 6-dehydrogenase OS=Homo sapiens GN=UGDH PE=1 SV=1                                                     | UGDH_HUMAN      | 55 kDa  | 100% |
| 304 | 14-3-3 protein gamma OS=Homo sapiens GN=YWHAG PE=1 SV=2                                                           | 1433G_HUMAN     | 28 kDa  | 100% |
| 305 | Dolichyl-diphosphooligosaccharide--protein glycosyltransferase subunit 1 OS=Homo sapiens GN=RPN1 PE=1 SV=1        | RPN1_HUMAN      | 69 kDa  | 100% |
| 306 | Calpastatin OS=Homo sapiens GN=CAST PE=1 SV=4                                                                     | ICAL_HUMAN      | 77 kDa  | 100% |
| 307 | Gelsolin OS=Homo sapiens GN=GSN PE=1 SV=1                                                                         | GELS_HUMAN      | 86 kDa  | 100% |
| 308 | Cytochrome b-c1 complex subunit 7 OS=Homo sapiens GN=UQCRB PE=1 SV=2                                              | QCR7_HUMAN      | 14 kDa  | 100% |
| 309 | Bifunctional 3'-phosphoadenosine 5'-phosphosulfate synthase 2 OS=Homo sapiens GN=PAPS2 PE=1 SV=2                  | PAPS2_HUMAN     | 70 kDa  | 100% |
| 310 | Endoplasmin OS=Homo sapiens GN=HSP90B1 PE=1 SV=1                                                                  | ENPL_HUMAN      | 92 kDa  | 100% |
| 311 | PDZ domain-containing protein GIPC1 OS=Homo sapiens GN=GIPC1 PE=1 SV=2                                            | GIPC1_HUMAN     | 36 kDa  | 100% |
| 312 | Aspartate--tRNA ligase, cytoplasmic OS=Homo sapiens GN=DARS PE=1 SV=2                                             | SYDC_HUMAN      | 57 kDa  | 99%  |
| 313 | Rho GDP-dissociation inhibitor 1 OS=Homo sapiens GN=ARHGDI1 PE=1 SV=3                                             | GDIR1_HUMAN     | 23 kDa  | 100% |
| 314 | Nuclear autoantigenic sperm protein OS=Homo sapiens GN=NASP PE=1 SV=2                                             | NASP_HUMAN      | 85 kDa  | 100% |
| 315 | Tyrosine--tRNA ligase, cytoplasmic OS=Homo sapiens GN=YARS PE=1 SV=4                                              | SYYC_HUMAN      | 59 kDa  | 100% |

|     |                                                                                              |                 |         |      |
|-----|----------------------------------------------------------------------------------------------|-----------------|---------|------|
| 316 | Superkiller viralicidic activity 2-like 2 OS=Homo sapiens GN=SKIV2L2 PE=1 SV=3               | SK2L2_HUMAN     | 118 kDa | 100% |
| 317 | Tumor protein D54 OS=Homo sapiens GN=TPD52L2 PE=1 SV=2                                       | TPD54_HUMAN     | 22 kDa  | 99%  |
| 318 | Stomatin-like protein 2, mitochondrial OS=Homo sapiens GN=STOML2 PE=1 SV=1                   | STML2_HUMAN     | 39 kDa  | 99%  |
| 319 | Transcription activator BRG1 OS=Homo sapiens GN=SMARCA4 PE=1 SV=2                            | SMCA4_HUMAN     | 185 kDa | 100% |
| 320 | Plasminogen activator inhibitor 1 RNA-binding protein OS=Homo sapiens GN=SERBP1 PE=1 SV=2    | PAIRB_HUMAN     | 45 kDa  | 100% |
| 321 | Heterogeneous nuclear ribonucleoprotein R OS=Homo sapiens GN=HNRNPR PE=1 SV=1                | HNRPR_HUMAN     | 71 kDa  | 100% |
| 322 | Prostaglandin E synthase 3 OS=Homo sapiens GN=PTGES3 PE=1 SV=1                               | TEBP_HUMAN      | 19 kDa  | 100% |
| 323 | DNA-(apurinic or apyrimidinic site) lyase OS=Homo sapiens GN=APEX1 PE=1 SV=2                 | APEX1_HUMAN     | 36 kDa  | 99%  |
| 324 | Uncharacterized protein C7orf50 OS=Homo sapiens GN=C7orf50 PE=1 SV=1                         | CG050_HUMAN     | 22 kDa  | 99%  |
| 325 | 14-3-3 protein sigma OS=Homo sapiens GN=SFN PE=1 SV=1                                        | 1433S_HUMAN     | 28 kDa  | 100% |
| 326 | Heterogeneous nuclear ribonucleoprotein D0 OS=Homo sapiens GN=HNRNPD PE=1 SV=1               | HNRPD_HUMAN     | 38 kDa  | 93%  |
| 327 | 14-3-3 protein theta OS=Homo sapiens GN=YWHAQ PE=1 SV=1                                      | 1433T_HUMAN     | 28 kDa  | 100% |
| 328 | 60S ribosomal protein L23a OS=Homo sapiens GN=RPL23A PE=1 SV=1                               | RL23A_HUMAN     | 18 kDa  | 100% |
| 329 | Exportin-2 OS=Homo sapiens GN=CSE1L PE=1 SV=3                                                | XPO2_HUMAN      | 110 kDa | 100% |
| 330 | Cluster of Spliceosome RNA helicase DDX39B OS=Homo sapiens GN=DDX39B PE=1 SV=1 (DX39B_HUMAN) | DX39B_HUMAN [2] | 49 kDa  | 100% |
| 331 | Fructose-1,6-bisphosphatase 1 OS=Homo sapiens GN=FBP1 PE=1 SV=5                              | F16P1_HUMAN     | 37 kDa  | 100% |
| 332 | L-lactate dehydrogenase A chain OS=Homo sapiens GN=LDHA PE=1 SV=2                            | LDHA_HUMAN      | 37 kDa  | 100% |
| 333 | Proteasome subunit alpha type-7 OS=Homo sapiens GN=PSMA7 PE=1 SV=1                           | PSA7_HUMAN      | 28 kDa  | 99%  |
| 334 | Calpain-1 catalytic subunit OS=Homo sapiens GN=CAPN1 PE=1 SV=1                               | CAN1_HUMAN      | 82 kDa  | 100% |
| 335 | Endoplasmic reticulum resident protein 29 OS=Homo sapiens GN=ERP29 PE=1 SV=4                 | ERP29_HUMAN     | 29 kDa  | 100% |
| 336 | Putative RNA-binding protein Luc7-like 2 OS=Homo sapiens GN=LUC7L2 PE=1 SV=2                 | LC7L2_HUMAN     | 47 kDa  | 100% |
| 337 | Proteasome activator complex subunit 1 OS=Homo sapiens GN=PSME1 PE=1 SV=1                    | PSME1_HUMAN     | 29 kDa  | 100% |
| 338 | N-alpha-acetyltransferase 10 OS=Homo sapiens GN=NAA10 PE=1 SV=1                              | NAA10_HUMAN     | 26 kDa  | 100% |
| 339 | 60S ribosomal export protein NMD3 OS=Homo sapiens GN=NMD3 PE=1 SV=1                          | NMD3_HUMAN      | 58 kDa  | 100% |
| 340 | Eukaryotic translation initiation factor 3 subunit C OS=Homo sapiens GN=EIF3C PE=1 SV=1      | EIF3C_HUMAN     | 105 kDa | 99%  |
| 341 | Mitochondrial import receptor subunit TOM20 homolog OS=Homo sapiens GN=TOMM20 PE=1 SV=1      | TOM20_HUMAN     | 16 kDa  | 99%  |

|     |                                                                                                  |                  |         |      |
|-----|--------------------------------------------------------------------------------------------------|------------------|---------|------|
| 342 | Ran-specific GTPase-activating protein OS=Homo sapiens GN=RANBP1 PE=1 SV=1                       | RANG_HUMAN       | 23 kDa  | 100% |
| 343 | Nucleobindin-1 OS=Homo sapiens GN=NUCB1 PE=1 SV=4                                                | NUCB1_HUMAN      | 54 kDa  | 100% |
| 344 | RNA-binding protein 28 OS=Homo sapiens GN=RBM28 PE=1 SV=3                                        | RBM28_HUMAN      | 86 kDa  | 100% |
| 345 | Exportin-1 OS=Homo sapiens GN=XPO1 PE=1 SV=1                                                     | XPO1_HUMAN       | 123 kDa | 100% |
| 346 | Calumenin OS=Homo sapiens GN=CALU PE=1 SV=2                                                      | CALU_HUMAN       | 37 kDa  | 99%  |
| 347 | Heterogeneous nuclear ribonucleoprotein U OS=Homo sapiens GN=HNRNPU PE=1 SV=6                    | HNRPU_HUMAN      | 91 kDa  | 98%  |
| 348 | Ribonuclease inhibitor OS=Homo sapiens GN=RNH1 PE=1 SV=2                                         | RINI_HUMAN       | 50 kDa  | 99%  |
| 349 | Small nuclear ribonucleoprotein E OS=Homo sapiens GN=SNRPE PE=1 SV=1                             | RUXE_HUMAN       | 11 kDa  | 99%  |
| 350 | Peroxiredoxin-5, mitochondrial OS=Homo sapiens GN=PRDX5 PE=1 SV=4                                | PRDX5_HUMAN      | 22 kDa  | 99%  |
| 351 | LDLR chaperone MESD OS=Homo sapiens GN=MESDC2 PE=1 SV=2                                          | MESD_HUMAN       | 26 kDa  | 100% |
| 352 | Heterogeneous nuclear ribonucleoprotein H2 OS=Homo sapiens GN=HNRNPH2 PE=1 SV=1                  | HNRH2_HUMAN      | 49 kDa  | 18%  |
| 353 | Hepatoma-derived growth factor-related protein 2 OS=Homo sapiens GN=HDGFRP2 PE=1 SV=1            | HDGR2_HUMAN      | 74 kDa  | 100% |
| 354 | Perilipin-3 OS=Homo sapiens GN=PLIN3 PE=1 SV=3                                                   | PLIN3_HUMAN      | 47 kDa  | 99%  |
| 355 | Sorting nexin-5 OS=Homo sapiens GN=SNX5 PE=1 SV=1                                                | SNX5_HUMAN       | 47 kDa  | 100% |
| 356 | Endoplasmic reticulum resident protein 44 OS=Homo sapiens GN=ERP44 PE=1 SV=1                     | ERP44_HUMAN      | 47 kDa  | 100% |
| 357 | Aspartyl/asparaginyl beta-hydroxylase OS=Homo sapiens GN=ASPH PE=1 SV=3                          | ASPH_HUMAN       | 86 kDa  | 99%  |
| 358 | Cytoskeleton-associated protein 4 OS=Homo sapiens GN=CKAP4 PE=1 SV=2                             | CKAP4_HUMAN      | 66 kDa  | 100% |
| 359 | RNA-binding motif protein, X chromosome OS=Homo sapiens GN=RBMX PE=1 SV=3                        | RBMX_HUMAN (+1)  | 42 kDa  | 99%  |
| 360 | ATP-dependent RNA helicase DDX19A OS=Homo sapiens GN=DDX19A PE=1 SV=1                            | DD19A_HUMAN      | 54 kDa  | 99%  |
| 361 | PCTP-like protein OS=Homo sapiens GN=STARD10 PE=1 SV=2                                           | PCTL_HUMAN       | 33 kDa  | 100% |
| 362 | Platelet-activating factor acetylhydrolase IB subunit alpha OS=Homo sapiens GN=PFAH1B1 PE=1 SV=2 | LIS1_HUMAN       | 47 kDa  | 99%  |
| 363 | Glucose-6-phosphate 1-dehydrogenase OS=Homo sapiens GN=G6PD PE=1 SV=4                            | G6PD_HUMAN       | 59 kDa  | 99%  |
| 364 | 40S ribosomal protein S17-like OS=Homo sapiens GN=RPS17L PE=2 SV=1                               | RS17L_HUMAN (+1) | 16 kDa  | 100% |
| 365 | Nucleolar RNA helicase 2 OS=Homo sapiens GN=DDX21 PE=1 SV=5                                      | DDX21_HUMAN      | 87 kDa  | 100% |
| 366 | Scaffold attachment factor B1 OS=Homo sapiens GN=SAFB PE=1 SV=4                                  | SAFB1_HUMAN      | 103 kDa | 100% |
| 367 | Vesicular integral-membrane protein VIP36 OS=Homo sapiens GN=LMAN2 PE=1 SV=1                     | LMAN2_HUMAN      | 40 kDa  | 100% |



|     |                                                                                                                                                     |                 |         |      |
|-----|-----------------------------------------------------------------------------------------------------------------------------------------------------|-----------------|---------|------|
| 368 | Alanine--tRNA ligase, cytoplasmic OS=Homo sapiens GN=AARS PE=1 SV=2                                                                                 | SYAC_HUMAN      | 107 kDa | 100% |
| 369 | Protein furry homolog-like OS=Homo sapiens GN=FRYL PE=1 SV=2                                                                                        | FRYL_HUMAN      | 340 kDa | 100% |
| 370 | Hsp90 co-chaperone Cdc37 OS=Homo sapiens GN=CDC37 PE=1 SV=1                                                                                         | CDC37_HUMAN     | 44 kDa  | 100% |
| 371 | Sorting nexin-6 OS=Homo sapiens GN=SNX6 PE=1 SV=1                                                                                                   | SNX6_HUMAN      | 47 kDa  | 99%  |
| 372 | 26S proteasome non-ATPase regulatory subunit 1 OS=Homo sapiens GN=PSMD1 PE=1 SV=2                                                                   | PSMD1_HUMAN     | 106 kDa | 100% |
| 373 | Transportin-1 OS=Homo sapiens GN=TNPO1 PE=1 SV=2                                                                                                    | TNPO1_HUMAN     | 102 kDa | 100% |
| 374 | Transportin-2 OS=Homo sapiens GN=TNPO2 PE=1 SV=3                                                                                                    | TNPO2_HUMAN     | 101 kDa | 100% |
| 375 | Signal recognition particle receptor subunit beta OS=Homo sapiens GN=SRPRB PE=1 SV=3                                                                | SRPRB_HUMAN     | 30 kDa  | 99%  |
| 376 | Vacuolar protein sorting-associated protein 26A OS=Homo sapiens GN=VPS26A PE=1 SV=2                                                                 | VP26A_HUMAN     | 38 kDa  | 78%  |
| 377 | Valine--tRNA ligase OS=Homo sapiens GN=VAR5 PE=1 SV=4                                                                                               | SYVC_HUMAN      | 140 kDa | 100% |
| 378 | A-kinase anchor protein 8-like OS=Homo sapiens GN=AKAP8L PE=1 SV=3                                                                                  | AKP8L_HUMAN     | 72 kDa  | 99%  |
| 379 | BH3-interacting domain death agonist OS=Homo sapiens GN=BID PE=1 SV=1                                                                               | BID_HUMAN       | 22 kDa  | 99%  |
| 380 | Heterogeneous nuclear ribonucleoprotein F OS=Homo sapiens GN=HNRNPF PE=1 SV=3                                                                       | HNRPF_HUMAN     | 46 kDa  | 99%  |
| 381 | Prohibitin-2 OS=Homo sapiens GN=PHB2 PE=1 SV=2                                                                                                      | PHB2_HUMAN      | 33 kDa  | 99%  |
| 382 | Adenylyl cyclase-associated protein 1 OS=Homo sapiens GN=CAP1 PE=1 SV=5                                                                             | CAP1_HUMAN      | 52 kDa  | 100% |
| 383 | Heterogeneous nuclear ribonucleoprotein H OS=Homo sapiens GN=HNRNPH1 PE=1 SV=4                                                                      | HNRH1_HUMAN     | 49 kDa  | 100% |
| 384 | Eukaryotic translation initiation factor 3 subunit J OS=Homo sapiens GN=EIF3J PE=1 SV=2                                                             | EIF3J_HUMAN     | 29 kDa  | 100% |
| 385 | Inorganic pyrophosphatase OS=Homo sapiens GN=PPA1 PE=1 SV=2                                                                                         | IPYR_HUMAN      | 33 kDa  | 100% |
| 386 | tRNA (cytosine(34)-C(5))-methyltransferase OS=Homo sapiens GN=NSUN2 PE=1 SV=2                                                                       | NSUN2_HUMAN     | 86 kDa  | 100% |
| 387 | Histone H2A.V OS=Homo sapiens GN=H2AFV PE=1 SV=3                                                                                                    | H2AV_HUMAN (+1) | 14 kDa  | 99%  |
| 388 | Dihydropyridyllysine-residue succinyltransferase component of 2-oxoglutarate dehydrogenase complex, mitochondrial OS=Homo sapiens GN=DLST PE=1 SV=4 | ODO2_HUMAN      | 49 kDa  | 99%  |
| 389 | 39S ribosomal protein L41, mitochondrial OS=Homo sapiens GN=MRPL41 PE=1 SV=1                                                                        | RM41_HUMAN      | 15 kDa  | 99%  |
| 390 | Small glutamine-rich tetratricopeptide repeat-containing protein alpha OS=Homo sapiens GN=SGTA PE=1 SV=1                                            | SGTA_HUMAN      | 34 kDa  | 99%  |
| 391 | Superoxide dismutase [Cu-Zn] OS=Homo sapiens GN=SOD1 PE=1 SV=2                                                                                      | SODC_HUMAN      | 16 kDa  | 99%  |
| 392 | Filamin-C OS=Homo sapiens GN=FLNC PE=1 SV=3                                                                                                         | FLNC_HUMAN      | 291 kDa | 94%  |

|     |                                                                                                        |             |         |      |
|-----|--------------------------------------------------------------------------------------------------------|-------------|---------|------|
| 393 | Chloride intracellular channel protein 1 OS=Homo sapiens GN=CLIC1 PE=1 SV=4                            | CLIC1_HUMAN | 27 kDa  | 100% |
| 394 | Zinc finger CCHC domain-containing protein 8 OS=Homo sapiens GN=ZCCHC8 PE=1 SV=2                       | ZCHC8_HUMAN | 79 kDa  | 100% |
| 395 | 14-3-3 protein beta/alpha OS=Homo sapiens GN=YWHAB PE=1 SV=3                                           | 1433B_HUMAN | 28 kDa  | 100% |
| 396 | Rho-related GTP-binding protein RhoB OS=Homo sapiens GN=RHOB PE=1 SV=1                                 | RHOB_HUMAN  | 22 kDa  | 98%  |
| 397 | Histone H4 OS=Homo sapiens GN=HIST1H4A PE=1 SV=2                                                       | H4_HUMAN    | 11 kDa  | 99%  |
| 398 | Peptidyl-prolyl cis-trans isomerase FKBP5 OS=Homo sapiens GN=FKBP5 PE=1 SV=2                           | FKBP5_HUMAN | 51 kDa  | 99%  |
| 399 | ERO1-like protein alpha OS=Homo sapiens GN=ERO1L PE=1 SV=2                                             | ERO1A_HUMAN | 54 kDa  | 99%  |
| 400 | Glutamine--fructose-6-phosphate aminotransferase [isomerizing] 1 OS=Homo sapiens GN=GFPT1 PE=1 SV=3    | GFPT1_HUMAN | 79 kDa  | 99%  |
| 401 | 60S ribosomal protein L14 OS=Homo sapiens GN=RPL14 PE=1 SV=4                                           | RL14_HUMAN  | 23 kDa  | 99%  |
| 402 | Serine/threonine-protein kinase OSR1 OS=Homo sapiens GN=OXSR1 PE=1 SV=1                                | OXSR1_HUMAN | 58 kDa  | 99%  |
| 403 | Chromobox protein homolog 1 OS=Homo sapiens GN=CBX1 PE=1 SV=1                                          | CBX1_HUMAN  | 21 kDa  | 99%  |
| 404 | ATP-citrate synthase OS=Homo sapiens GN=ACLY PE=1 SV=3                                                 | ACLY_HUMAN  | 121 kDa | 80%  |
| 405 | Epidermal growth factor receptor kinase substrate 8-like protein 1 OS=Homo sapiens GN=EPS8L1 PE=1 SV=3 | ES8L1_HUMAN | 80 kDa  | 100% |
| 406 | Dynamin-like 120 kDa protein, mitochondrial OS=Homo sapiens GN=OPA1 PE=1 SV=3                          | OPA1_HUMAN  | 112 kDa | 100% |
| 407 | Nucleosome assembly protein 1-like 4 OS=Homo sapiens GN=NAP1L4 PE=1 SV=1                               | NP1L4_HUMAN | 43 kDa  | 99%  |
| 408 | Annexin A1 OS=Homo sapiens GN=ANXA1 PE=1 SV=2                                                          | ANXA1_HUMAN | 39 kDa  | 99%  |
| 409 | AP-1 complex subunit sigma-1A OS=Homo sapiens GN=AP1S1 PE=1 SV=1                                       | AP1S1_HUMAN | 19 kDa  | 99%  |
| 410 | Copper chaperone for superoxide dismutase OS=Homo sapiens GN=CCS PE=1 SV=1                             | CCS_HUMAN   | 29 kDa  | 99%  |
| 411 | A-kinase anchor protein 8 OS=Homo sapiens GN=AKAP8 PE=1 SV=1                                           | AKAP8_HUMAN | 76 kDa  | 62%  |
| 412 | Acyl-CoA desaturase OS=Homo sapiens GN=SCD PE=1 SV=2                                                   | ACOD_HUMAN  | 42 kDa  | 99%  |
| 413 | Membrane-associated progesterone receptor component 1 OS=Homo sapiens GN=PGRMC1 PE=1 SV=3              | PGRC1_HUMAN | 22 kDa  | 99%  |
| 414 | Double-stranded RNA-binding protein Staufen homolog 1 OS=Homo sapiens GN=STAU1 PE=1 SV=2               | STAU1_HUMAN | 63 kDa  | 99%  |
| 415 | Dynactin subunit 2 OS=Homo sapiens GN=DCTN2 PE=1 SV=4                                                  | DCTN2_HUMAN | 44 kDa  | 99%  |
| 416 | 26S proteasome non-ATPase regulatory subunit 4 OS=Homo sapiens GN=PSMD4 PE=1 SV=1                      | PSMD4_HUMAN | 41 kDa  | 99%  |
| 417 | Histone-binding protein RBBP4 OS=Homo sapiens GN=RBBP4 PE=1 SV=3                                       | RBBP4_HUMAN | 48 kDa  | 99%  |
| 418 | 60S ribosomal protein L35a OS=Homo sapiens GN=RPL35A PE=1 SV=2                                         | RL35A_HUMAN | 13 kDa  | 99%  |

|     |                                                                                     |             |         |      |
|-----|-------------------------------------------------------------------------------------|-------------|---------|------|
| 419 | Cytosol aminopeptidase OS=Homo sapiens GN=LAP3 PE=1 SV=3                            | AMPL_HUMAN  | 56 kDa  | 100% |
| 420 | Large proline-rich protein BAG6 OS=Homo sapiens GN=BAG6 PE=1 SV=2                   | BAG6_HUMAN  | 119 kDa | 99%  |
| 421 | Coatomer subunit zeta-1 OS=Homo sapiens GN=COPZ1 PE=1 SV=1                          | COPZ1_HUMAN | 20 kDa  | 99%  |
| 422 | Importin-7 OS=Homo sapiens GN=IPO7 PE=1 SV=1                                        | IPO7_HUMAN  | 120 kDa | 99%  |
| 423 | Rab11 family-interacting protein 1 OS=Homo sapiens GN=RAB11FIP1 PE=1 SV=2           | RFIP1_HUMAN | 137 kDa | 99%  |
| 424 | Opioid growth factor receptor OS=Homo sapiens GN=OGFR PE=1 SV=3                     | OGFR_HUMAN  | 73 kDa  | 99%  |
| 425 | Prolactin regulatory element-binding protein OS=Homo sapiens GN=PREB PE=1 SV=2      | PREB_HUMAN  | 45 kDa  | 99%  |
| 426 | Asparagine--tRNA ligase, cytoplasmic OS=Homo sapiens GN=NARS PE=1 SV=1              | SYNC_HUMAN  | 63 kDa  | 99%  |
| 427 | Transketolase OS=Homo sapiens GN=TKT PE=1 SV=3                                      | TKT_HUMAN   | 68 kDa  | 99%  |
| 428 | Vacuolar protein sorting-associated protein 37A OS=Homo sapiens GN=VPS37A PE=1 SV=1 | VP37A_HUMAN | 44 kDa  | 99%  |
| 429 | AN1-type zinc finger protein 6 OS=Homo sapiens GN=ZFAND6 PE=1 SV=2                  | ZFAN6_HUMAN | 23 kDa  | 99%  |
| 430 | 40S ribosomal protein S21 OS=Homo sapiens GN=RPS21 PE=1 SV=1                        | RS21_HUMAN  | 9 kDa   | 99%  |

---

**Table S2 Identified a total of 469 proteins in set two**

| #    | Identified Proteins                                                                            | Accession Number | Molecular Weight | Probability |
|------|------------------------------------------------------------------------------------------------|------------------|------------------|-------------|
| 1    | Neuroblast differentiation-associated protein AHNAK OS=Homo sapiens GN=AHNAK PE=1 SV=2         | AHNAK_HUMAN      | 629 kDa          | 100%        |
| 2    | Cluster of Heat shock protein HSP 90-alpha OS=Homo sapiens GN=HSP90AA1 PE=1 SV=5 (HS90A_HUMAN) | HS90A_HUMAN [3]  | 85 kDa           | 100%        |
| 2.1  | Heat shock protein HSP 90-alpha OS=Homo sapiens GN=HSP90AA1 PE=1 SV=5                          | HS90A_HUMAN      | 85 kDa           | 100%        |
| 2.2  | Heat shock protein HSP 90-beta OS=Homo sapiens GN=HSP90AB1 PE=1 SV=4                           | HS90B_HUMAN      | 83 kDa           | 100%        |
| 3    | Keratin, type II cytoskeletal 8 OS=Homo sapiens GN=KRT8 PE=1 SV=7                              | K2C8_HUMAN       | 54 kDa           | 100%        |
| 4    | Tubulin alpha-1A chain OS=Homo sapiens GN=TUBA1A PE=1 SV=1                                     | TBA1A_HUMAN (+2) | 50 kDa           | 100%        |
| 5    | Heat shock 70 kDa protein 1A/1B OS=Homo sapiens GN=HSPA1A PE=1 SV=5                            | HSP71_HUMAN      | 70 kDa           | 100%        |
| 6    | Keratin, type I cytoskeletal 18 OS=Homo sapiens GN=KRT18 PE=1 SV=2                             | K1C18_HUMAN      | 48 kDa           | 100%        |
| 7    | Cluster of Alpha-actinin-4 OS=Homo sapiens GN=ACTN4 PE=1 SV=2 (ACTN4_HUMAN)                    | ACTN4_HUMAN [2]  | 105 kDa          | 100%        |
| 7.1  | Alpha-actinin-4 OS=Homo sapiens GN=ACTN4 PE=1 SV=2                                             | ACTN4_HUMAN      | 105 kDa          | 100%        |
| 7.2  | Alpha-actinin-1 OS=Homo sapiens GN=ACTN1 PE=1 SV=2                                             | ACTN1_HUMAN      | 103 kDa          | 100%        |
| 8    | Cluster of Tubulin beta chain OS=Homo sapiens GN=TUBB PE=1 SV=2 (TBB5_HUMAN)                   | TBB5_HUMAN [6]   | 50 kDa           | 100%        |
| 8.1  | Tubulin beta chain OS=Homo sapiens GN=TUBB PE=1 SV=2                                           | TBB5_HUMAN       | 50 kDa           | 100%        |
| 8.3  | Tubulin beta-3 chain OS=Homo sapiens GN=TUBB3 PE=1 SV=2                                        | TBB3_HUMAN       | 50 kDa           | 81%         |
| 8.4  | Tubulin beta-4B chain OS=Homo sapiens GN=TUBB4B PE=1 SV=1                                      | TBB4B_HUMAN      | 50 kDa           | 76%         |
| 9    | Cluster of Actin, cytoplasmic 1 OS=Homo sapiens GN=ACTB PE=1 SV=1 (ACTB_HUMAN)                 | ACTB_HUMAN [6]   | 42 kDa           | 100%        |
| 9.1  | Actin, cytoplasmic 1 OS=Homo sapiens GN=ACTB PE=1 SV=1                                         | ACTB_HUMAN (+1)  | 42 kDa           | 100%        |
| 9.2  | Actin, aortic smooth muscle OS=Homo sapiens GN=ACTA2 PE=1 SV=1                                 | ACTA_HUMAN (+2)  | 42 kDa           | 99%         |
| 9.3  | POTE ankyrin domain family member F OS=Homo sapiens GN=POTEF PE=1 SV=2                         | POTEF_HUMAN      | 121 kDa          | 94%         |
| 10   | Cluster of Myosin-9 OS=Homo sapiens GN=MYH9 PE=1 SV=4 (MYH9_HUMAN)                             | MYH9_HUMAN [2]   | 227 kDa          | 100%        |
| 10.1 | Myosin-9 OS=Homo sapiens GN=MYH9 PE=1 SV=4                                                     | MYH9_HUMAN       | 227 kDa          | 100%        |
| 11   | 14-3-3 protein zeta/delta OS=Homo sapiens GN=YWHAZ PE=1 SV=1                                   | 1433Z_HUMAN      | 28 kDa           | 100%        |
| 12   | Cluster of Clathrin heavy chain 1 OS=Homo sapiens GN=CLTC PE=1 SV=5 (CLH1_HUMAN)               | CLH1_HUMAN [2]   | 192 kDa          | 100%        |

|      |                                                                                               |                |         |      |
|------|-----------------------------------------------------------------------------------------------|----------------|---------|------|
| 12.1 | Clathrin heavy chain 1 OS=Homo sapiens GN=CLTC PE=1 SV=5                                      | CLH1_HUMAN     | 192 kDa | 100% |
| 13   | Protein SEC13 homolog OS=Homo sapiens GN=SEC13 PE=1 SV=3                                      | SEC13_HUMAN    | 36 kDa  | 99%  |
| 14   | Cluster of Tropomyosin alpha-4 chain OS=Homo sapiens GN=TPM4 PE=1 SV=3 (TPM4_HUMAN)           | TPM4_HUMAN [2] | 29 kDa  | 100% |
| 14.1 | Tropomyosin alpha-4 chain OS=Homo sapiens GN=TPM4 PE=1 SV=3                                   | TPM4_HUMAN     | 29 kDa  | 100% |
| 14.2 | Tropomyosin alpha-3 chain OS=Homo sapiens GN=TPM3 PE=1 SV=1                                   | TPM3_HUMAN     | 33 kDa  | 100% |
| 15   | Proteasome subunit beta type-7 OS=Homo sapiens GN=PSMB7 PE=1 SV=1                             | PSB7_HUMAN     | 30 kDa  | 100% |
| 16   | Calnexin OS=Homo sapiens GN=CANX PE=1 SV=2                                                    | CALX_HUMAN     | 68 kDa  | 100% |
| 17   | Cluster of Filamin-A OS=Homo sapiens GN=FLNA PE=1 SV=4 (FLNA_HUMAN)                           | FLNA_HUMAN [3] | 281 kDa | 100% |
| 17.1 | Filamin-A OS=Homo sapiens GN=FLNA PE=1 SV=4                                                   | FLNA_HUMAN     | 281 kDa | 100% |
| 17.2 | Filamin-B OS=Homo sapiens GN=FLNB PE=1 SV=2                                                   | FLNB_HUMAN     | 278 kDa | 100% |
| 18   | 78 kDa glucose-regulated protein OS=Homo sapiens GN=HSPA5 PE=1 SV=2                           | GRP78_HUMAN    | 72 kDa  | 100% |
| 19   | Cytoplasmic dynein 1 heavy chain 1 OS=Homo sapiens GN=DYNC1H1 PE=1 SV=5                       | DYHC1_HUMAN    | 532 kDa | 100% |
| 20   | Profilin-1 OS=Homo sapiens GN=PFN1 PE=1 SV=2                                                  | PROF1_HUMAN    | 15 kDa  | 99%  |
| 21   | 60 kDa heat shock protein, mitochondrial OS=Homo sapiens GN=HSPD1 PE=1 SV=2                   | CH60_HUMAN     | 61 kDa  | 100% |
| 22   | Fructose-bisphosphate aldolase C OS=Homo sapiens GN=ALDOC PE=1 SV=2                           | ALDOC_HUMAN    | 39 kDa  | 100% |
| 23   | Alpha-enolase OS=Homo sapiens GN=ENO1 PE=1 SV=2                                               | ENOA_HUMAN     | 47 kDa  | 100% |
| 24   | Nucleolin OS=Homo sapiens GN=NCL PE=1 SV=3                                                    | NUCL_HUMAN     | 77 kDa  | 100% |
| 25   | Dipeptidyl peptidase 3 OS=Homo sapiens GN=DPP3 PE=1 SV=2                                      | DPP3_HUMAN     | 83 kDa  | 100% |
| 26   | Radixin OS=Homo sapiens GN=RDX PE=1 SV=1                                                      | RADI_HUMAN     | 69 kDa  | 99%  |
| 27   | Nucleophosmin OS=Homo sapiens GN=NPM1 PE=1 SV=2                                               | NPM_HUMAN      | 33 kDa  | 100% |
| 28   | Pyruvate kinase isozymes M1/M2 OS=Homo sapiens GN=PKM PE=1 SV=4                               | KPYM_HUMAN     | 58 kDa  | 100% |
| 29   | Annexin A2 OS=Homo sapiens GN=ANXA2 PE=1 SV=2                                                 | ANXA2_HUMAN    | 39 kDa  | 100% |
| 30   | Calreticulin OS=Homo sapiens GN=CALR PE=1 SV=1                                                | CALR_HUMAN     | 48 kDa  | 100% |
| 31   | Cluster of Heat shock cognate 71 kDa protein OS=Homo sapiens GN=HSPA8 PE=1 SV=1 (HSP7C_HUMAN) | HSP7C_HUMAN    | 71 kDa  | 100% |
| 31.1 | Heat shock cognate 71 kDa protein OS=Homo sapiens GN=HSPA8 PE=1 SV=1                          | HSP7C_HUMAN    | 71 kDa  | 100% |
| 32   | Protein disulfide-isomerase OS=Homo sapiens GN=P4HB PE=1 SV=3                                 | PDIA1_HUMAN    | 57 kDa  | 100% |

|    |                                                                                                         |             |         |      |
|----|---------------------------------------------------------------------------------------------------------|-------------|---------|------|
| 33 | Transcription intermediary factor 1-beta OS=Homo sapiens GN=TRIM28 PE=1 SV=5                            | TIF1B_HUMAN | 89 kDa  | 100% |
| 34 | Myosin-14 OS=Homo sapiens GN=MYH14 PE=1 SV=2                                                            | MYH14_HUMAN | 228 kDa | 100% |
| 35 | Peptidyl-prolyl cis-trans isomerase FKBP4 OS=Homo sapiens GN=FKBP4 PE=1 SV=3                            | FKBP4_HUMAN | 52 kDa  | 100% |
| 36 | Staphylococcal nuclease domain-containing protein 1 OS=Homo sapiens GN=SND1 PE=1 SV=1                   | SND1_HUMAN  | 102 kDa | 100% |
| 37 | Protein disulfide-isomerase A4 OS=Homo sapiens GN=PDIA4 PE=1 SV=2                                       | PDIA4_HUMAN | 73 kDa  | 100% |
| 38 | DNA-dependent protein kinase catalytic subunit OS=Homo sapiens GN=PRKDC PE=1 SV=3                       | PRKDC_HUMAN | 469 kDa | 100% |
| 39 | PRA1 family protein 2 OS=Homo sapiens GN=PRAF2 PE=1 SV=1                                                | PRAF2_HUMAN | 19 kDa  | 99%  |
| 40 | Partner of Y14 and mago OS=Homo sapiens GN=WIBG PE=1 SV=1                                               | WIBG_HUMAN  | 23 kDa  | 98%  |
| 41 | 14-3-3 protein epsilon OS=Homo sapiens GN=YWHAE PE=1 SV=1                                               | 1433E_HUMAN | 29 kDa  | 100% |
| 42 | Plectin OS=Homo sapiens GN=PLEC PE=1 SV=3                                                               | PLEC_HUMAN  | 532 kDa | 100% |
| 43 | SUMO-activating enzyme subunit 2 OS=Homo sapiens GN=UBA2 PE=1 SV=2                                      | SAE2_HUMAN  | 71 kDa  | 100% |
| 44 | SUMO-activating enzyme subunit 1 OS=Homo sapiens GN=SAE1 PE=1 SV=1                                      | SAE1_HUMAN  | 38 kDa  | 100% |
| 45 | Calmodulin OS=Homo sapiens GN=CALM1 PE=1 SV=2                                                           | CALM_HUMAN  | 17 kDa  | 100% |
| 46 | Complement component 1 Q subcomponent-binding protein, mitochondrial OS=Homo sapiens GN=C1QBP PE=1 SV=1 | C1QBP_HUMAN | 31 kDa  | 100% |
| 47 | 60S acidic ribosomal protein P2 OS=Homo sapiens GN=RPLP2 PE=1 SV=1                                      | RLA2_HUMAN  | 12 kDa  | 100% |
| 48 | Thioredoxin OS=Homo sapiens GN=TXN PE=1 SV=3                                                            | THIO_HUMAN  | 12 kDa  | 100% |
| 49 | Splicing factor, proline- and glutamine-rich OS=Homo sapiens GN=SFPQ PE=1 SV=2                          | SFPQ_HUMAN  | 76 kDa  | 100% |
| 50 | Anterior gradient protein 2 homolog OS=Homo sapiens GN=AGR2 PE=1 SV=1                                   | AGR2_HUMAN  | 20 kDa  | 99%  |
| 51 | Ezrin OS=Homo sapiens GN=EZR PE=1 SV=4                                                                  | EZRI_HUMAN  | 69 kDa  | 98%  |
| 52 | Bcl-2-associated transcription factor 1 OS=Homo sapiens GN=BCLAF1 PE=1 SV=2                             | BCLF1_HUMAN | 106 kDa | 100% |
| 53 | Protein unc-45 homolog A OS=Homo sapiens GN=UNC45A PE=1 SV=1                                            | UN45A_HUMAN | 103 kDa | 100% |
| 54 | Heterogeneous nuclear ribonucleoprotein Q OS=Homo sapiens GN=SYNCRIP PE=1 SV=2                          | HNRPQ_HUMAN | 70 kDa  | 100% |
| 55 | 40S ribosomal protein S3 OS=Homo sapiens GN=RPS3 PE=1 SV=2                                              | RS3_HUMAN   | 27 kDa  | 100% |
| 56 | NEDD8 OS=Homo sapiens GN=NEDD8 PE=1 SV=1                                                                | NEDD8_HUMAN | 9 kDa   | 100% |
| 57 | Chromobox protein homolog 3 OS=Homo sapiens GN=CBX3 PE=1 SV=4                                           | CBX3_HUMAN  | 21 kDa  | 100% |
| 58 | Prelamin-A/C OS=Homo sapiens GN=LMNA PE=1 SV=1                                                          | LMNA_HUMAN  | 74 kDa  | 100% |

|      |                                                                                                                  |                 |         |      |
|------|------------------------------------------------------------------------------------------------------------------|-----------------|---------|------|
| 59   | Protein disulfide-isomerase A6 OS=Homo sapiens GN=PDIA6 PE=1 SV=1                                                | PDIA6_HUMAN     | 48 kDa  | 100% |
| 60   | Spectrin alpha chain, non-erythrocytic 1 OS=Homo sapiens GN=SPTAN1 PE=1 SV=3                                     | SPTN1_HUMAN     | 285 kDa | 100% |
| 61   | Ras GTPase-activating-like protein IQGAP1 OS=Homo sapiens GN=IQGAP1 PE=1 SV=1                                    | IQGA1_HUMAN     | 189 kDa | 100% |
| 62   | X-ray repair cross-complementing protein 5 OS=Homo sapiens GN=XRCC5 PE=1 SV=3                                    | XRCC5_HUMAN     | 83 kDa  | 100% |
| 63   | Y-box-binding protein 3 OS=Homo sapiens GN=YBX3 PE=1 SV=4                                                        | YBOX3_HUMAN     | 40 kDa  | 100% |
| 64   | Serine/arginine-rich splicing factor 5 OS=Homo sapiens GN=SRSF5 PE=1 SV=1                                        | SRSF5_HUMAN     | 31 kDa  | 100% |
| 65   | 26S proteasome non-ATPase regulatory subunit 11 OS=Homo sapiens GN=PSMD11 PE=1 SV=3                              | PSD11_HUMAN     | 47 kDa  | 99%  |
| 66   | Apolipoprotein B-100 OS=Homo sapiens GN=APOB PE=1 SV=2                                                           | APOB_HUMAN      | 516 kDa | 99%  |
| 67   | 40S ribosomal protein S7 OS=Homo sapiens GN=RPS7 PE=1 SV=1                                                       | RS7_HUMAN       | 22 kDa  | 97%  |
| 68   | Keratin, type I cytoskeletal 19 OS=Homo sapiens GN=KRT19 PE=1 SV=4                                               | K1C19_HUMAN     | 44 kDa  | 100% |
| 69   | Myoferlin OS=Homo sapiens GN=MYOF PE=1 SV=1                                                                      | MYOF_HUMAN      | 235 kDa | 100% |
| 70   | Protein SET OS=Homo sapiens GN=SET PE=1 SV=3                                                                     | SET_HUMAN       | 33 kDa  | 100% |
| 71   | Na(+)/H(+) exchange regulatory cofactor NHE-RF1 OS=Homo sapiens GN=SLC9A3R1 PE=1 SV=4                            | NHRF1_HUMAN     | 39 kDa  | 100% |
| 72   | Heterogeneous nuclear ribonucleoproteins A2/B1 OS=Homo sapiens GN=HNRNPA2B1 PE=1 SV=2                            | ROA2_HUMAN      | 37 kDa  | 100% |
| 73   | ATP synthase subunit alpha, mitochondrial OS=Homo sapiens GN=ATP5A1 PE=1 SV=1                                    | ATPA_HUMAN      | 60 kDa  | 100% |
| 74   | Glyceraldehyde-3-phosphate dehydrogenase OS=Homo sapiens GN=GAPDH PE=1 SV=3                                      | G3P_HUMAN       | 36 kDa  | 100% |
| 75   | Splicing factor 3B subunit 3 OS=Homo sapiens GN=SF3B3 PE=1 SV=4                                                  | SF3B3_HUMAN     | 136 kDa | 100% |
| 76   | Cathepsin D OS=Homo sapiens GN=CTSD PE=1 SV=1                                                                    | CATD_HUMAN      | 45 kDa  | 100% |
| 77   | NADP-dependent malic enzyme OS=Homo sapiens GN=ME1 PE=1 SV=1                                                     | MAOX_HUMAN      | 64 kDa  | 99%  |
| 78   | Serine/arginine-rich splicing factor 2 OS=Homo sapiens GN=SRSF2 PE=1 SV=4                                        | SRSF2_HUMAN     | 25 kDa  | 99%  |
| 79   | 6-phosphogluconate dehydrogenase, decarboxylating OS=Homo sapiens GN=PGD PE=1 SV=3                               | 6PGD_HUMAN      | 53 kDa  | 100% |
| 80   | pre-rRNA processing protein FTSJ3 OS=Homo sapiens GN=FTSJ3 PE=1 SV=2                                             | SPB1_HUMAN      | 97 kDa  | 100% |
| 81   | Cluster of Sarcoplasmic/endoplasmic reticulum calcium ATPase 2 OS=Homo sapiens GN=ATP2A2 PE=1 SV=1 (AT2A2_HUMAN) | AT2A2_HUMAN [2] | 115 kDa | 100% |
| 81.1 | Sarcoplasmic/endoplasmic reticulum calcium ATPase 2 OS=Homo sapiens GN=ATP2A2 PE=1 SV=1                          | AT2A2_HUMAN     | 115 kDa | 100% |
| 81.2 | Sarcoplasmic/endoplasmic reticulum calcium ATPase 1 OS=Homo sapiens GN=ATP2A1 PE=1 SV=1                          | AT2A1_HUMAN     | 110 kDa | 96%  |
| 82   | Peroxiredoxin-6 OS=Homo sapiens GN=PRDX6 PE=1 SV=3                                                               | PRDX6_HUMAN     | 25 kDa  | 100% |

|     |                                                                                          |                  |         |      |
|-----|------------------------------------------------------------------------------------------|------------------|---------|------|
| 83  | Prefoldin subunit 4 OS=Homo sapiens GN=PFDN4 PE=1 SV=1                                   | PFD4_HUMAN       | 15 kDa  | 100% |
| 84  | Ubiquitin-like modifier-activating enzyme 1 OS=Homo sapiens GN=UBA1 PE=1 SV=3            | UBA1_HUMAN       | 118 kDa | 100% |
| 85  | X-ray repair cross-complementing protein 6 OS=Homo sapiens GN=XRCC6 PE=1 SV=2            | XRCC6_HUMAN      | 70 kDa  | 100% |
| 86  | Pre-mRNA-processing factor 40 homolog A OS=Homo sapiens GN=PRPF40A PE=1 SV=2             | PR40A_HUMAN      | 109 kDa | 100% |
| 87  | Thyroid hormone receptor-associated protein 3 OS=Homo sapiens GN=THRAP3 PE=1 SV=2        | TR150_HUMAN      | 109 kDa | 100% |
| 88  | 40S ribosomal protein S14 OS=Homo sapiens GN=RPS14 PE=1 SV=3                             | RS14_HUMAN       | 16 kDa  | 100% |
| 89  | Src substrate cortactin OS=Homo sapiens GN=CTTN PE=1 SV=2                                | SRC8_HUMAN       | 62 kDa  | 100% |
| 90  | Triosephosphate isomerase OS=Homo sapiens GN=TPI1 PE=1 SV=3                              | TPIS_HUMAN       | 31 kDa  | 100% |
| 91  | 60S ribosomal protein L4 OS=Homo sapiens GN=RPL4 PE=1 SV=5                               | RL4_HUMAN        | 48 kDa  | 100% |
| 92  | Proliferation-associated protein 2G4 OS=Homo sapiens GN=PA2G4 PE=1 SV=3                  | PA2G4_HUMAN      | 44 kDa  | 99%  |
| 93  | Fructose-bisphosphate aldolase A OS=Homo sapiens GN=ALDOA PE=1 SV=2                      | ALDOA_HUMAN      | 39 kDa  | 100% |
| 94  | Cold shock domain-containing protein E1 OS=Homo sapiens GN=CSDE1 PE=1 SV=2               | CSDE1_HUMAN      | 89 kDa  | 100% |
| 95  | Eukaryotic translation initiation factor 2 subunit 2 OS=Homo sapiens GN=EIF2S2 PE=1 SV=2 | IF2B_HUMAN       | 38 kDa  | 100% |
| 96  | Transitional endoplasmic reticulum ATPase OS=Homo sapiens GN=VCP PE=1 SV=4               | TERA_HUMAN       | 89 kDa  | 100% |
| 97  | Isocitrate dehydrogenase [NADP], mitochondrial OS=Homo sapiens GN=IDH2 PE=1 SV=2         | IDHP_HUMAN       | 51 kDa  | 100% |
| 98  | Heterogeneous nuclear ribonucleoprotein A1-like 2 OS=Homo sapiens GN=HNRNPA1L2 PE=2 SV=2 | RA1L2_HUMAN (+1) | 34 kDa  | 100% |
| 99  | Heterogeneous nuclear ribonucleoprotein A3 OS=Homo sapiens GN=HNRNPA3 PE=1 SV=2          | ROA3_HUMAN       | 40 kDa  | 100% |
| 100 | Stathmin OS=Homo sapiens GN=STMN1 PE=1 SV=3                                              | STMN1_HUMAN      | 17 kDa  | 100% |
| 101 | Myristoylated alanine-rich C-kinase substrate OS=Homo sapiens GN=MARCKS PE=1 SV=4        | MARCS_HUMAN      | 32 kDa  | 100% |
| 102 | Ubiquitin carboxyl-terminal hydrolase 14 OS=Homo sapiens GN=USP14 PE=1 SV=3              | UBP14_HUMAN      | 56 kDa  | 100% |
| 103 | Gelsolin OS=Homo sapiens GN=GSN PE=1 SV=1                                                | GELS_HUMAN       | 86 kDa  | 100% |
| 104 | Brain acid soluble protein 1 OS=Homo sapiens GN=BASP1 PE=1 SV=2                          | BASP1_HUMAN      | 23 kDa  | 100% |
| 105 | Superkiller viralicidic activity 2-like 2 OS=Homo sapiens GN=SKIV2L2 PE=1 SV=3           | SK2L2_HUMAN      | 118 kDa | 100% |
| 106 | Ubiquitin-conjugating enzyme E2 variant 1 OS=Homo sapiens GN=UBE2V1 PE=1 SV=2            | UB2V1_HUMAN      | 16 kDa  | 100% |
| 107 | Vesicle-trafficking protein SEC22b OS=Homo sapiens GN=SEC22B PE=1 SV=4                   | SC22B_HUMAN      | 25 kDa  | 100% |
| 108 | Talin-1 OS=Homo sapiens GN=TLN1 PE=1 SV=3                                                | TLN1_HUMAN       | 270 kDa | 100% |



|       |                                                                                               |               |         |      |
|-------|-----------------------------------------------------------------------------------------------|---------------|---------|------|
| 109   | 60S ribosomal protein L10 OS=Homo sapiens GN=RPL10 PE=1 SV=4                                  | RL10_HUMAN    | 25 kDa  | 99%  |
| 110   | 26S proteasome non-ATPase regulatory subunit 6 OS=Homo sapiens GN=PSMD6 PE=1 SV=1             | PSMD6_HUMAN   | 46 kDa  | 100% |
| 111   | Hypoxia up-regulated protein 1 OS=Homo sapiens GN=HYOU1 PE=1 SV=1                             | HYOU1_HUMAN   | 111 kDa | 100% |
| 112   | F-actin-capping protein subunit alpha-1 OS=Homo sapiens GN=CAPZA1 PE=1 SV=3                   | CAZA1_HUMAN   | 33 kDa  | 100% |
| 113   | Neutral alpha-glucosidase AB OS=Homo sapiens GN=GANAB PE=1 SV=3                               | GANAB_HUMAN   | 107 kDa | 100% |
| 114   | Spectrin beta chain, non-erythrocytic 1 OS=Homo sapiens GN=SPTBN1 PE=1 SV=2                   | SPTB2_HUMAN   | 275 kDa | 100% |
| 115   | C-1-tetrahydrofolate synthase, cytoplasmic OS=Homo sapiens GN=MTHFD1 PE=1 SV=3                | C1TC_HUMAN    | 102 kDa | 100% |
| 116   | Heat shock protein 105 kDa OS=Homo sapiens GN=HSPH1 PE=1 SV=1                                 | HS105_HUMAN   | 97 kDa  | 100% |
| 117   | Elongation factor 2 OS=Homo sapiens GN=EEF2 PE=1 SV=4                                         | EF2_HUMAN     | 95 kDa  | 100% |
| 118   | Cluster of Puromycin-sensitive aminopeptidase OS=Homo sapiens GN=NPEPPS PE=1 SV=2 (PSA_HUMAN) | PSA_HUMAN [2] | 103 kDa | 100% |
| 118.1 | Puromycin-sensitive aminopeptidase OS=Homo sapiens GN=NPEPPS PE=1 SV=2                        | PSA_HUMAN     | 103 kDa | 95%  |
| 119   | Heat shock protein beta-1 OS=Homo sapiens GN=HSPB1 PE=1 SV=2                                  | HSPB1_HUMAN   | 23 kDa  | 100% |
| 120   | RNA-binding protein 39 OS=Homo sapiens GN=RBM39 PE=1 SV=2                                     | RBM39_HUMAN   | 59 kDa  | 100% |
| 121   | Endoplasmic reticulum resident protein 29 OS=Homo sapiens GN=ERP29 PE=1 SV=4                  | ERP29_HUMAN   | 29 kDa  | 100% |
| 122   | Cluster of Phosphoglycerate kinase 1 OS=Homo sapiens GN=PGK1 PE=1 SV=3 (PGK1_HUMAN)           | PGK1_HUMAN    | 45 kDa  | 100% |
| 122.1 | Phosphoglycerate kinase 1 OS=Homo sapiens GN=PGK1 PE=1 SV=3                                   | PGK1_HUMAN    | 45 kDa  | 99%  |
| 122.2 | Phosphoglycerate kinase 2 OS=Homo sapiens GN=PGK2 PE=1 SV=3                                   | PGK2_HUMAN    | 45 kDa  | 11%  |
| 123   | Serine/arginine repetitive matrix protein 2 OS=Homo sapiens GN=SRRM2 PE=1 SV=2                | SRRM2_HUMAN   | 300 kDa | 100% |
| 124   | Nuclear mitotic apparatus protein 1 OS=Homo sapiens GN=NUMA1 PE=1 SV=2                        | NUMA1_HUMAN   | 238 kDa | 100% |
| 125   | C-Jun-amino-terminal kinase-interacting protein 4 OS=Homo sapiens GN=SPAG9 PE=1 SV=4          | JIP4_HUMAN    | 146 kDa | 100% |
| 126   | Putative tropomyosin alpha-3 chain-like protein OS=Homo sapiens PE=5 SV=2                     | TPM3L_HUMAN   | 26 kDa  | 100% |
| 127   | Proteasome subunit alpha type-5 OS=Homo sapiens GN=PSMA5 PE=1 SV=3                            | PSA5_HUMAN    | 26 kDa  | 100% |
| 128   | Leucine-rich PPR motif-containing protein, mitochondrial OS=Homo sapiens GN=LRPPRC PE=1 SV=3  | LRPPRC_HUMAN  | 158 kDa | 100% |
| 129   | ATP synthase subunit gamma, mitochondrial OS=Homo sapiens GN=ATP5C1 PE=1 SV=1                 | ATPG_HUMAN    | 33 kDa  | 100% |
| 130   | Elongation factor Ts, mitochondrial OS=Homo sapiens GN=TSMF PE=1 SV=2                         | EFTS_HUMAN    | 35 kDa  | 100% |
| 131   | Vacuolar protein sorting-associated protein 13C OS=Homo sapiens GN=VPS13C PE=1 SV=1           | VP13C_HUMAN   | 422 kDa | 99%  |

|       |                                                                                                       |                  |         |      |
|-------|-------------------------------------------------------------------------------------------------------|------------------|---------|------|
| 132   | BolA-like protein 2 OS=Homo sapiens GN=BOLA2 PE=1 SV=1                                                | BOLA2_HUMAN      | 10 kDa  | 99%  |
| 133   | Ubiquitin-60S ribosomal protein L40 OS=Homo sapiens GN=UBA52 PE=1 SV=2                                | RL40_HUMAN (+3)  | 15 kDa  | 99%  |
| 134   | Fragile X mental retardation syndrome-related protein 1 OS=Homo sapiens GN=FXR1 PE=1 SV=3             | FXR1_HUMAN       | 70 kDa  | 100% |
| 135   | Lamin-B1 OS=Homo sapiens GN=LMNB1 PE=1 SV=2                                                           | LMNB1_HUMAN      | 66 kDa  | 100% |
| 136   | 4F2 cell-surface antigen heavy chain OS=Homo sapiens GN=SLC3A2 PE=1 SV=3                              | 4F2_HUMAN        | 68 kDa  | 100% |
| 137   | Bifunctional purine biosynthesis protein PURH OS=Homo sapiens GN=ATIC PE=1 SV=3                       | PUR9_HUMAN       | 65 kDa  | 100% |
| 138   | Eukaryotic translation initiation factor 3 subunit B OS=Homo sapiens GN=EIF3B PE=1 SV=3               | EIF3B_HUMAN      | 92 kDa  | 100% |
| 139   | Eukaryotic translation initiation factor 4 gamma 1 OS=Homo sapiens GN=EIF4G1 PE=1 SV=4                | IF4G1_HUMAN      | 175 kDa | 100% |
| 140   | 14-3-3 protein eta OS=Homo sapiens GN=YWHAH PE=1 SV=4                                                 | 1433F_HUMAN      | 28 kDa  | 100% |
| 141   | Aspartate--tRNA ligase, cytoplasmic OS=Homo sapiens GN=DARS PE=1 SV=2                                 | SYDC_HUMAN       | 57 kDa  | 100% |
| 142   | 26S protease regulatory subunit 6A OS=Homo sapiens GN=PSMC3 PE=1 SV=3                                 | PRS6A_HUMAN      | 49 kDa  | 100% |
| 143   | Putative pre-mRNA-splicing factor ATP-dependent RNA helicase DHX15 OS=Homo sapiens GN=DHX15 PE=1 SV=2 | DHX15_HUMAN      | 91 kDa  | 100% |
| 144   | Heterogeneous nuclear ribonucleoproteins C1/C2 OS=Homo sapiens GN=HNRNPC PE=1 SV=4                    | HNRPC_HUMAN (+1) | 34 kDa  | 100% |
| 145   | Heterogeneous nuclear ribonucleoprotein L OS=Homo sapiens GN=HNRNPL PE=1 SV=2                         | HNRPL_HUMAN      | 64 kDa  | 100% |
| 146   | Transcription activator BRG1 OS=Homo sapiens GN=SMARCA4 PE=1 SV=2                                     | SMCA4_HUMAN      | 185 kDa | 100% |
| 147   | Heat shock 70 kDa protein 4 OS=Homo sapiens GN=HSPA4 PE=1 SV=4                                        | HSP74_HUMAN      | 94 kDa  | 100% |
| 148   | 14-3-3 protein theta OS=Homo sapiens GN=YWHAQ PE=1 SV=1                                               | 1433T_HUMAN      | 28 kDa  | 100% |
| 149   | Glycogen phosphorylase, brain form OS=Homo sapiens GN=PYGB PE=1 SV=5                                  | PYGB_HUMAN       | 97 kDa  | 100% |
| 150   | Peptidyl-prolyl cis-trans isomerase A OS=Homo sapiens GN=PPIA PE=1 SV=2                               | PPIA_HUMAN       | 18 kDa  | 100% |
| 151   | Cytospin-B OS=Homo sapiens GN=SPECC1 PE=1 SV=1                                                        | CYTSB_HUMAN      | 119 kDa | 100% |
| 152   | Cluster of Keratin, type I cytoskeletal 14 OS=Homo sapiens GN=KRT14 PE=1 SV=4 (K1C14_HUMAN)           | K1C14_HUMAN [3]  | 52 kDa  | 100% |
| 152.1 | Keratin, type I cytoskeletal 14 OS=Homo sapiens GN=KRT14 PE=1 SV=4                                    | K1C14_HUMAN      | 52 kDa  | 75%  |
| 153   | DNA-directed RNA polymerase II subunit RPB1 OS=Homo sapiens GN=POLR2A PE=1 SV=2                       | RPB1_HUMAN       | 217 kDa | 100% |
| 154   | Prostaglandin E synthase 3 OS=Homo sapiens GN=PTGES3 PE=1 SV=1                                        | TEBP_HUMAN       | 19 kDa  | 100% |
| 155   | Protein arginine N-methyltransferase 8 OS=Homo sapiens GN=PRMT8 PE=1 SV=2                             | ANM8_HUMAN       | 45 kDa  | 100% |
| 156   | Programmed cell death 6-interacting protein OS=Homo sapiens GN=PDCD6IP PE=1 SV=1                      | PDC6I_HUMAN      | 96 kDa  | 100% |

|     |                                                                                                                                    |             |         |      |
|-----|------------------------------------------------------------------------------------------------------------------------------------|-------------|---------|------|
| 157 | Fructose-1,6-bisphosphatase 1 OS=Homo sapiens GN=FBP1 PE=1 SV=5                                                                    | F16P1_HUMAN | 37 kDa  | 100% |
| 158 | Proteasome activator complex subunit 2 OS=Homo sapiens GN=PSME2 PE=1 SV=4                                                          | PSME2_HUMAN | 27 kDa  | 100% |
| 159 | 40S ribosomal protein S18 OS=Homo sapiens GN=RPS18 PE=1 SV=3                                                                       | RS18_HUMAN  | 18 kDa  | 99%  |
| 160 | Eukaryotic translation initiation factor 3 subunit C OS=Homo sapiens GN=EIF3C PE=1 SV=1                                            | EIF3C_HUMAN | 105 kDa | 99%  |
| 161 | Glutaredoxin-3 OS=Homo sapiens GN=GLRX3 PE=1 SV=2                                                                                  | GLRX3_HUMAN | 37 kDa  | 99%  |
| 162 | GrpE protein homolog 1, mitochondrial OS=Homo sapiens GN=GRPEL1 PE=1 SV=2                                                          | GRPE1_HUMAN | 24 kDa  | 99%  |
| 163 | Heterogeneous nuclear ribonucleoprotein K OS=Homo sapiens GN=HNRNPK PE=1 SV=1                                                      | HNRPK_HUMAN | 51 kDa  | 99%  |
| 164 | Bifunctional 3'-phosphoadenosine 5'-phosphosulfate synthase 2 OS=Homo sapiens GN=PAPSS2 PE=1 SV=2                                  | PAPS2_HUMAN | 70 kDa  | 100% |
| 165 | Fatty acid synthase OS=Homo sapiens GN=FASN PE=1 SV=3                                                                              | FAS_HUMAN   | 273 kDa | 100% |
| 166 | 14-3-3 protein sigma OS=Homo sapiens GN=SFN PE=1 SV=1                                                                              | 1433S_HUMAN | 28 kDa  | 100% |
| 167 | Sodium/potassium-transporting ATPase subunit alpha-1 OS=Homo sapiens GN=ATP1A1 PE=1 SV=1                                           | AT1A1_HUMAN | 113 kDa | 100% |
| 168 | Proteasome subunit alpha type-7 OS=Homo sapiens GN=PSMA7 PE=1 SV=1                                                                 | PSA7_HUMAN  | 28 kDa  | 100% |
| 169 | PDZ domain-containing protein GIPC1 OS=Homo sapiens GN=GIPC1 PE=1 SV=2                                                             | GIPC1_HUMAN | 36 kDa  | 100% |
| 170 | Dolichyl-diphosphooligosaccharide--protein glycosyltransferase subunit 1 OS=Homo sapiens GN=RPN1 PE=1 SV=1                         | RPN1_HUMAN  | 69 kDa  | 100% |
| 171 | Vigilin OS=Homo sapiens GN=HDLBP PE=1 SV=2                                                                                         | VIGLN_HUMAN | 141 kDa | 100% |
| 172 | Heterogeneous nuclear ribonucleoprotein D0 OS=Homo sapiens GN=HNRNPD PE=1 SV=1                                                     | HNRPD_HUMAN | 38 kDa  | 100% |
| 173 | PRKC apoptosis WT1 regulator protein OS=Homo sapiens GN=PAWR PE=1 SV=1                                                             | PAWR_HUMAN  | 37 kDa  | 100% |
| 174 | Actin-related protein 3 OS=Homo sapiens GN=ACTR3 PE=1 SV=3                                                                         | ARP3_HUMAN  | 47 kDa  | 100% |
| 175 | SWI/SNF-related matrix-associated actin-dependent regulator of chromatin subfamily A member 5 OS=Homo sapiens GN=SMARCA5 PE=1 SV=1 | SMCA5_HUMAN | 122 kDa | 100% |
| 176 | Interleukin enhancer-binding factor 3 OS=Homo sapiens GN=ILF3 PE=1 SV=3                                                            | ILF3_HUMAN  | 95 kDa  | 100% |
| 177 | Cytochrome b-c1 complex subunit 7 OS=Homo sapiens GN=UQCRB PE=1 SV=2                                                               | QCR7_HUMAN  | 14 kDa  | 100% |
| 178 | DnaJ homolog subfamily B member 1 OS=Homo sapiens GN=DNAJB1 PE=1 SV=4                                                              | DNJB1_HUMAN | 38 kDa  | 100% |
| 179 | Serine/arginine-rich splicing factor 1 OS=Homo sapiens GN=SRSF1 PE=1 SV=2                                                          | SRSF1_HUMAN | 28 kDa  | 100% |
| 180 | Rho GDP-dissociation inhibitor 1 OS=Homo sapiens GN=ARHGDI1 PE=1 SV=3                                                              | GDIR1_HUMAN | 23 kDa  | 100% |
| 181 | Plasminogen activator inhibitor 1 RNA-binding protein OS=Homo sapiens GN=SERBP1 PE=1 SV=2                                          | PAIRB_HUMAN | 45 kDa  | 100% |

|     |                                                                                              |                  |         |      |
|-----|----------------------------------------------------------------------------------------------|------------------|---------|------|
| 182 | LDLR chaperone MESD OS=Homo sapiens GN=MESDC2 PE=1 SV=2                                      | MESD_HUMAN       | 26 kDa  | 100% |
| 183 | Heterogeneous nuclear ribonucleoprotein H2 OS=Homo sapiens GN=HNRNPH2 PE=1 SV=1              | HNRH2_HUMAN      | 49 kDa  | 100% |
| 184 | Heterogeneous nuclear ribonucleoprotein R OS=Homo sapiens GN=HNRNPR PE=1 SV=1                | HNRPR_HUMAN      | 71 kDa  | 100% |
| 185 | Lupus La protein OS=Homo sapiens GN=SSB PE=1 SV=2                                            | LA_HUMAN         | 47 kDa  | 100% |
| 186 | Dihydrolipoyl dehydrogenase, mitochondrial OS=Homo sapiens GN=DLD PE=1 SV=2                  | DLDH_HUMAN       | 54 kDa  | 100% |
| 187 | 40S ribosomal protein S3a OS=Homo sapiens GN=RPS3A PE=1 SV=2                                 | RS3A_HUMAN       | 30 kDa  | 100% |
| 188 | Transportin-1 OS=Homo sapiens GN=TNPO1 PE=1 SV=2                                             | TNPO1_HUMAN      | 102 kDa | 100% |
| 189 | Tyrosine--tRNA ligase, cytoplasmic OS=Homo sapiens GN=YARS PE=1 SV=4                         | SYYC_HUMAN       | 59 kDa  | 100% |
| 190 | DNA-(apurinic or apyrimidinic site) lyase OS=Homo sapiens GN=APEX1 PE=1 SV=2                 | APEX1_HUMAN      | 36 kDa  | 100% |
| 191 | ATP-dependent RNA helicase A OS=Homo sapiens GN=DHX9 PE=1 SV=4                               | DHX9_HUMAN       | 141 kDa | 100% |
| 192 | N-alpha-acetyltransferase 10 OS=Homo sapiens GN=NAA10 PE=1 SV=1                              | NAA10_HUMAN      | 26 kDa  | 100% |
| 193 | Uncharacterized protein C7orf50 OS=Homo sapiens GN=C7orf50 PE=1 SV=1                         | CG050_HUMAN      | 22 kDa  | 100% |
| 194 | Guanine nucleotide-binding protein subunit beta-2-like 1 OS=Homo sapiens GN=GNB2L1 PE=1 SV=3 | GBLP_HUMAN       | 35 kDa  | 100% |
| 195 | Exportin-2 OS=Homo sapiens GN=CSE1L PE=1 SV=3                                                | XPO2_HUMAN       | 110 kDa | 100% |
| 196 | Hepatoma-derived growth factor OS=Homo sapiens GN=HDGF PE=1 SV=1                             | HDGF_HUMAN       | 27 kDa  | 100% |
| 197 | Protein FAM162A OS=Homo sapiens GN=FAM162A PE=1 SV=2                                         | F162A_HUMAN      | 17 kDa  | 99%  |
| 198 | Glucose-6-phosphate 1-dehydrogenase OS=Homo sapiens GN=G6PD PE=1 SV=4                        | G6PD_HUMAN       | 59 kDa  | 99%  |
| 199 | Stomatin-like protein 2, mitochondrial OS=Homo sapiens GN=STOML2 PE=1 SV=1                   | STML2_HUMAN      | 39 kDa  | 99%  |
| 200 | Tumor protein D54 OS=Homo sapiens GN=TPD52L2 PE=1 SV=2                                       | TPD54_HUMAN      | 22 kDa  | 99%  |
| 201 | Malate dehydrogenase, cytoplasmic OS=Homo sapiens GN=MDH1 PE=1 SV=4                          | MDHC_HUMAN       | 36 kDa  | 99%  |
| 202 | DBIRD complex subunit KIAA1967 OS=Homo sapiens GN=KIAA1967 PE=1 SV=2                         | K1967_HUMAN      | 103 kDa | 100% |
| 203 | UDP-glucose 6-dehydrogenase OS=Homo sapiens GN=UGDH PE=1 SV=1                                | UGDH_HUMAN       | 55 kDa  | 100% |
| 204 | 14-3-3 protein gamma OS=Homo sapiens GN=YWHAG PE=1 SV=2                                      | 1433G_HUMAN      | 28 kDa  | 100% |
| 205 | 40S ribosomal protein S17-like OS=Homo sapiens GN=RPS17L PE=2 SV=1                           | RS17L_HUMAN (+1) | 16 kDa  | 100% |
| 206 | Calpastatin OS=Homo sapiens GN=CAST PE=1 SV=4                                                | ICAL_HUMAN       | 77 kDa  | 100% |
| 207 | Aconitate hydratase, mitochondrial OS=Homo sapiens GN=ACO2 PE=1 SV=2                         | ACON_HUMAN       | 85 kDa  | 100% |

|     |                                                                                                   |                 |         |      |
|-----|---------------------------------------------------------------------------------------------------|-----------------|---------|------|
| 208 | Nuclear migration protein nudC OS=Homo sapiens GN=NUDC PE=1 SV=1                                  | NUDC_HUMAN      | 38 kDa  | 100% |
| 209 | Calpain-1 catalytic subunit OS=Homo sapiens GN=CAPN1 PE=1 SV=1                                    | CAN1_HUMAN      | 82 kDa  | 100% |
| 210 | Scaffold attachment factor B1 OS=Homo sapiens GN=SAFB PE=1 SV=4                                   | SAFB1_HUMAN     | 103 kDa | 100% |
| 211 | Peroxiredoxin-5, mitochondrial OS=Homo sapiens GN=PRDX5 PE=1 SV=4                                 | PRDX5_HUMAN     | 22 kDa  | 100% |
| 212 | NADH dehydrogenase [ubiquinone] flavoprotein 2, mitochondrial OS=Homo sapiens GN=NDUFV2 PE=1 SV=2 | NDUV2_HUMAN     | 27 kDa  | 100% |
| 213 | Putative RNA-binding protein Luc7-like 2 OS=Homo sapiens GN=LUC7L2 PE=1 SV=2                      | LC7L2_HUMAN     | 47 kDa  | 100% |
| 214 | Nucleobindin-1 OS=Homo sapiens GN=NUCB1 PE=1 SV=4                                                 | NUCB1_HUMAN     | 54 kDa  | 100% |
| 215 | Cingulin OS=Homo sapiens GN=CGN PE=1 SV=2                                                         | CING_HUMAN      | 136 kDa | 100% |
| 216 | Cytoplasmic dynein 1 intermediate chain 2 OS=Homo sapiens GN=DYNC1I2 PE=1 SV=3                    | DC1I2_HUMAN     | 71 kDa  | 100% |
| 217 | Protein furry homolog-like OS=Homo sapiens GN=FRYL PE=1 SV=2                                      | FRYL_HUMAN      | 340 kDa | 100% |
| 218 | Sorting nexin-6 OS=Homo sapiens GN=SNX6 PE=1 SV=1                                                 | SNX6_HUMAN      | 47 kDa  | 100% |
| 219 | Serine/arginine-rich splicing factor 7 OS=Homo sapiens GN=SRSF7 PE=1 SV=1                         | SRSF7_HUMAN     | 27 kDa  | 100% |
| 220 | Epiplakin OS=Homo sapiens GN=EPPK1 PE=1 SV=2                                                      | EPIPL_HUMAN     | 556 kDa | 100% |
| 221 | Tyrosine-protein phosphatase non-receptor type 1 OS=Homo sapiens GN=PTPN1 PE=1 SV=1               | PTN1_HUMAN      | 50 kDa  | 100% |
| 222 | Inorganic pyrophosphatase OS=Homo sapiens GN=PPA1 PE=1 SV=2                                       | IPYR_HUMAN      | 33 kDa  | 100% |
| 223 | 1,2-dihydroxy-3-keto-5-methylthiopentene dioxygenase OS=Homo sapiens GN=ADI1 PE=1 SV=1            | MTND_HUMAN      | 21 kDa  | 100% |
| 224 | Eukaryotic translation initiation factor 5A-1 OS=Homo sapiens GN=EIF5A PE=1 SV=2                  | IF5A1_HUMAN     | 17 kDa  | 100% |
| 225 | Spermatogenesis-defective protein 39 homolog OS=Homo sapiens GN=VIPAS39 PE=1 SV=1                 | SPE39_HUMAN     | 57 kDa  | 100% |
| 226 | RNA-binding motif protein, X chromosome OS=Homo sapiens GN=RBMX PE=1 SV=3                         | RBMX_HUMAN (+1) | 42 kDa  | 100% |
| 227 | Hsp90 co-chaperone Cdc37 OS=Homo sapiens GN=CDC37 PE=1 SV=1                                       | CDC37_HUMAN     | 44 kDa  | 100% |
| 228 | Nuclear autoantigenic sperm protein OS=Homo sapiens GN=NASP PE=1 SV=2                             | NASP_HUMAN      | 85 kDa  | 100% |
| 229 | Transportin-2 OS=Homo sapiens GN=TNPO2 PE=1 SV=3                                                  | TNPO2_HUMAN     | 101 kDa | 100% |
| 230 | Heterogeneous nuclear ribonucleoprotein U OS=Homo sapiens GN=HNRNPU PE=1 SV=6                     | HNRPU_HUMAN     | 91 kDa  | 100% |
| 231 | 60S ribosomal export protein NMD3 OS=Homo sapiens GN=NMD3 PE=1 SV=1                               | NMD3_HUMAN      | 58 kDa  | 100% |
| 232 | Prohibitin OS=Homo sapiens GN=PHB PE=1 SV=1                                                       | PHB_HUMAN       | 30 kDa  | 100% |
| 233 | Vacuolar protein sorting-associated protein 26A OS=Homo sapiens GN=VPS26A PE=1 SV=2               | VP26A_HUMAN     | 38 kDa  | 100% |

|     |                                                                                                 |             |         |      |
|-----|-------------------------------------------------------------------------------------------------|-------------|---------|------|
| 234 | Perilipin-3 OS=Homo sapiens GN=PLIN3 PE=1 SV=3                                                  | PLIN3_HUMAN | 47 kDa  | 100% |
| 235 | Calumenin OS=Homo sapiens GN=CALU PE=1 SV=2                                                     | CALU_HUMAN  | 37 kDa  | 100% |
| 236 | Spliceosome RNA helicase DDX39B OS=Homo sapiens GN=DDX39B PE=1 SV=1                             | DX39B_HUMAN | 49 kDa  | 100% |
| 237 | Transcription elongation factor SPT6 OS=Homo sapiens GN=SUPT6H PE=1 SV=2                        | SPT6H_HUMAN | 199 kDa | 100% |
| 238 | Protein SON OS=Homo sapiens GN=SON PE=1 SV=4                                                    | SON_HUMAN   | 264 kDa | 100% |
| 239 | Sorting nexin-5 OS=Homo sapiens GN=SNX5 PE=1 SV=1                                               | SNX5_HUMAN  | 47 kDa  | 100% |
| 240 | 40S ribosomal protein S6 OS=Homo sapiens GN=RPS6 PE=1 SV=1                                      | RS6_HUMAN   | 29 kDa  | 100% |
| 241 | Serine/threonine-protein phosphatase 6 regulatory subunit 3 OS=Homo sapiens GN=PPP6R3 PE=1 SV=2 | PP6R3_HUMAN | 98 kDa  | 100% |
| 242 | tRNA-splicing ligase RtcB homolog OS=Homo sapiens GN=C22orf28 PE=1 SV=1                         | RTCB_HUMAN  | 55 kDa  | 100% |
| 243 | Protein TFG OS=Homo sapiens GN=TFG PE=1 SV=2                                                    | TFG_HUMAN   | 43 kDa  | 99%  |
| 244 | Transaldolase OS=Homo sapiens GN=TALDO1 PE=1 SV=2                                               | TALDO_HUMAN | 38 kDa  | 99%  |
| 245 | Gem-associated protein 5 OS=Homo sapiens GN=GEMIN5 PE=1 SV=3                                    | GEMI5_HUMAN | 169 kDa | 99%  |
| 246 | Protein HEXIM1 OS=Homo sapiens GN=HEXIM1 PE=1 SV=1                                              | HEX11_HUMAN | 41 kDa  | 99%  |
| 247 | Aspartyl/asparaginyl beta-hydroxylase OS=Homo sapiens GN=ASPH PE=1 SV=3                         | ASPH_HUMAN  | 86 kDa  | 99%  |
| 248 | Calcium-regulated heat stable protein 1 OS=Homo sapiens GN=CARHSP1 PE=1 SV=2                    | CHSP1_HUMAN | 16 kDa  | 99%  |
| 249 | Ribonuclease inhibitor OS=Homo sapiens GN=RNH1 PE=1 SV=2                                        | RINI_HUMAN  | 50 kDa  | 99%  |
| 250 | 60S ribosomal protein L23a OS=Homo sapiens GN=RPL23A PE=1 SV=1                                  | RL23A_HUMAN | 18 kDa  | 99%  |
| 251 | Small nuclear ribonucleoprotein E OS=Homo sapiens GN=SNRPE PE=1 SV=1                            | RUXE_HUMAN  | 11 kDa  | 99%  |
| 252 | Mitochondrial import receptor subunit TOM20 homolog OS=Homo sapiens GN=TOMM20 PE=1 SV=1         | TOM20_HUMAN | 16 kDa  | 99%  |
| 253 | Prenylcysteine oxidase 1 OS=Homo sapiens GN=PCYOX1 PE=1 SV=3                                    | PCYOX_HUMAN | 57 kDa  | 99%  |
| 254 | Treacle protein OS=Homo sapiens GN=TCOF1 PE=1 SV=3                                              | TCOF_HUMAN  | 152 kDa | 99%  |
| 255 | Heat shock protein beta-8 OS=Homo sapiens GN=HSPB8 PE=1 SV=1                                    | HSPB8_HUMAN | 22 kDa  | 98%  |
| 256 | Nucleolar RNA helicase 2 OS=Homo sapiens GN=DDX21 PE=1 SV=5                                     | DDX21_HUMAN | 87 kDa  | 100% |
| 257 | Ran-specific GTPase-activating protein OS=Homo sapiens GN=RANBP1 PE=1 SV=1                      | RANG_HUMAN  | 23 kDa  | 100% |
| 258 | Eukaryotic translation initiation factor 5 OS=Homo sapiens GN=EIF5 PE=1 SV=2                    | IF5_HUMAN   | 49 kDa  | 100% |
| 259 | Eukaryotic translation initiation factor 2 subunit 1 OS=Homo sapiens GN=EIF2S1 PE=1 SV=3        | IF2A_HUMAN  | 36 kDa  | 100% |

|     |                                                                                       |             |         |      |
|-----|---------------------------------------------------------------------------------------|-------------|---------|------|
| 260 | DNA topoisomerase 1 OS=Homo sapiens GN=TOP1 PE=1 SV=2                                 | TOP1_HUMAN  | 91 kDa  | 100% |
| 261 | Adapter molecule crk OS=Homo sapiens GN=CRK PE=1 SV=2                                 | CRK_HUMAN   | 34 kDa  | 100% |
| 262 | Trifunctional enzyme subunit alpha, mitochondrial OS=Homo sapiens GN=HADHA PE=1 SV=2  | ECHA_HUMAN  | 83 kDa  | 100% |
| 263 | RNA-binding protein 28 OS=Homo sapiens GN=RBM28 PE=1 SV=3                             | RBM28_HUMAN | 86 kDa  | 100% |
| 264 | Keratin, type II cytoskeletal 6A OS=Homo sapiens GN=KRT6A PE=1 SV=3                   | K2C6A_HUMAN | 60 kDa  | 100% |
| 265 | Heterogeneous nuclear ribonucleoprotein H OS=Homo sapiens GN=HNRNPH1 PE=1 SV=4        | HNRH1_HUMAN | 49 kDa  | 100% |
| 266 | 3-hydroxyisobutyrate dehydrogenase, mitochondrial OS=Homo sapiens GN=HIBADH PE=1 SV=2 | 3HIDH_HUMAN | 35 kDa  | 100% |
| 267 | Endoplasmic reticulum chaperone OS=Homo sapiens GN=HSP90B1 PE=1 SV=1                  | ENPL_HUMAN  | 92 kDa  | 100% |
| 268 | tRNA methyltransferase 112 homolog OS=Homo sapiens GN=TRMT112 PE=1 SV=1               | TR112_HUMAN | 14 kDa  | 100% |
| 269 | RNA-binding protein with serine-rich domain 1 OS=Homo sapiens GN=RNPS1 PE=1 SV=1      | RNPS1_HUMAN | 34 kDa  | 100% |
| 270 | Reticulocalbin-2 OS=Homo sapiens GN=RCN2 PE=1 SV=1                                    | RCN2_HUMAN  | 37 kDa  | 100% |
| 271 | 26S proteasome non-ATPase regulatory subunit 1 OS=Homo sapiens GN=PSMD1 PE=1 SV=2     | PSMD1_HUMAN | 106 kDa | 100% |
| 272 | Zinc finger CCHC domain-containing protein 8 OS=Homo sapiens GN=ZCCHC8 PE=1 SV=2      | ZCHC8_HUMAN | 79 kDa  | 100% |
| 273 | Cytoskeleton-associated protein 4 OS=Homo sapiens GN=CKAP4 PE=1 SV=2                  | CKAP4_HUMAN | 66 kDa  | 100% |
| 274 | 14-3-3 protein beta/alpha OS=Homo sapiens GN=YWHAB PE=1 SV=3                          | 1433B_HUMAN | 28 kDa  | 100% |
| 275 | Leucine-rich repeat-containing protein 59 OS=Homo sapiens GN=LRRC59 PE=1 SV=1         | LRC59_HUMAN | 35 kDa  | 100% |
| 276 | Septin-7 OS=Homo sapiens GN=SEPT7 PE=1 SV=2                                           | SEPT7_HUMAN | 51 kDa  | 100% |
| 277 | T-complex protein 1 subunit beta OS=Homo sapiens GN=CCT2 PE=1 SV=4                    | TCPB_HUMAN  | 57 kDa  | 100% |
| 278 | E3 ubiquitin-protein ligase UBR4 OS=Homo sapiens GN=UBR4 PE=1 SV=1                    | UBR4_HUMAN  | 574 kDa | 100% |
| 279 | Signal recognition particle receptor subunit beta OS=Homo sapiens GN=SRPRB PE=1 SV=3  | SRPRB_HUMAN | 30 kDa  | 100% |
| 280 | Adenylyl cyclase-associated protein 1 OS=Homo sapiens GN=CAP1 PE=1 SV=5               | CAP1_HUMAN  | 52 kDa  | 100% |
| 281 | Chloride intracellular channel protein 1 OS=Homo sapiens GN=CLIC1 PE=1 SV=4           | CLIC1_HUMAN | 27 kDa  | 100% |
| 282 | Microtubule-associated protein tau OS=Homo sapiens GN=MAPT PE=1 SV=5                  | TAU_HUMAN   | 79 kDa  | 100% |
| 283 | Galactokinase OS=Homo sapiens GN=GALK1 PE=1 SV=1                                      | GALK1_HUMAN | 42 kDa  | 100% |
| 284 | Catenin alpha-1 OS=Homo sapiens GN=CTNNA1 PE=1 SV=1                                   | CTNA1_HUMAN | 100 kDa | 100% |
| 285 | 60S ribosomal protein L27 OS=Homo sapiens GN=RPL27 PE=1 SV=2                          | RL27_HUMAN  | 16 kDa  | 100% |

|     |                                                                                                   |                  |         |      |
|-----|---------------------------------------------------------------------------------------------------|------------------|---------|------|
| 286 | Eukaryotic translation initiation factor 3 subunit H OS=Homo sapiens GN=EIF3H PE=1 SV=1           | EIF3H_HUMAN      | 40 kDa  | 100% |
| 287 | Protein HID1 OS=Homo sapiens GN=HID1 PE=1 SV=1                                                    | HID1_HUMAN       | 89 kDa  | 100% |
| 288 | AP-1 complex subunit beta-1 OS=Homo sapiens GN=APIB1 PE=1 SV=2                                    | APIB1_HUMAN      | 105 kDa | 99%  |
| 289 | Methylcrotonoyl-CoA carboxylase subunit alpha, mitochondrial OS=Homo sapiens GN=MCCC1 PE=1 SV=3   | MCCA_HUMAN       | 80 kDa  | 99%  |
| 290 | Sec1 family domain-containing protein 1 OS=Homo sapiens GN=SCFD1 PE=1 SV=4                        | SCFD1_HUMAN      | 72 kDa  | 99%  |
| 291 | RNA-binding protein 25 OS=Homo sapiens GN=RBM25 PE=1 SV=3                                         | RBM25_HUMAN      | 100 kDa | 99%  |
| 292 | Eukaryotic translation initiation factor 6 OS=Homo sapiens GN=EIF6 PE=1 SV=1                      | IF6_HUMAN        | 27 kDa  | 99%  |
| 293 | A-kinase anchor protein 8-like OS=Homo sapiens GN=AKAP8L PE=1 SV=3                                | AKP8L_HUMAN      | 72 kDa  | 99%  |
| 294 | Actin-related protein 2 OS=Homo sapiens GN=ACTR2 PE=1 SV=1                                        | ARP2_HUMAN       | 45 kDa  | 99%  |
| 295 | Cytosolic acyl coenzyme A thioester hydrolase OS=Homo sapiens GN=ACOT7 PE=1 SV=3                  | BACH_HUMAN       | 42 kDa  | 99%  |
| 296 | BH3-interacting domain death agonist OS=Homo sapiens GN=BID PE=1 SV=1                             | BID_HUMAN        | 22 kDa  | 99%  |
| 297 | Chromobox protein homolog 1 OS=Homo sapiens GN=CBX1 PE=1 SV=1                                     | CBX1_HUMAN       | 21 kDa  | 99%  |
| 298 | ATP-dependent RNA helicase DDX19A OS=Homo sapiens GN=DDX19A PE=1 SV=1                             | DD19A_HUMAN (+1) | 54 kDa  | 99%  |
| 299 | Endoplasmic reticulum resident protein 44 OS=Homo sapiens GN=ERP44 PE=1 SV=1                      | ERP44_HUMAN      | 47 kDa  | 99%  |
| 300 | Golgi to ER traffic protein 4 homolog OS=Homo sapiens GN=GET4 PE=1 SV=1                           | GET4_HUMAN       | 37 kDa  | 99%  |
| 301 | Hepatoma-derived growth factor-related protein 2 OS=Homo sapiens GN=HDGFRP2 PE=1 SV=1             | HDGR2_HUMAN      | 74 kDa  | 99%  |
| 302 | L-lactate dehydrogenase A chain OS=Homo sapiens GN=LDHA PE=1 SV=2                                 | LDHA_HUMAN       | 37 kDa  | 99%  |
| 303 | Platelet-activating factor acetylhydrolase IB subunit alpha OS=Homo sapiens GN=PAFAH1B1 PE=1 SV=2 | LIS1_HUMAN       | 47 kDa  | 99%  |
| 304 | Vesicular integral-membrane protein VIP36 OS=Homo sapiens GN=LMAN2 PE=1 SV=1                      | LMAN2_HUMAN      | 40 kDa  | 99%  |
| 305 | PCTP-like protein OS=Homo sapiens GN=STARD10 PE=1 SV=2                                            | PCTL_HUMAN       | 33 kDa  | 99%  |
| 306 | Prohibitin-2 OS=Homo sapiens GN=PHB2 PE=1 SV=2                                                    | PHB2_HUMAN       | 33 kDa  | 99%  |
| 307 | Proteasome activator complex subunit 1 OS=Homo sapiens GN=PSME1 PE=1 SV=1                         | PSME1_HUMAN      | 29 kDa  | 99%  |
| 308 | Splicing factor 3A subunit 3 OS=Homo sapiens GN=SF3A3 PE=1 SV=1                                   | SF3A3_HUMAN      | 59 kDa  | 99%  |
| 309 | Exportin-1 OS=Homo sapiens GN=XPO1 PE=1 SV=1                                                      | XPO1_HUMAN       | 123 kDa | 99%  |
| 310 | Synaptic vesicle membrane protein VAT-1 homolog OS=Homo sapiens GN=VAT1 PE=1 SV=2                 | VAT1_HUMAN       | 42 kDa  | 99%  |
| 311 | Fragile X mental retardation syndrome-related protein 2 OS=Homo sapiens GN=FXR2 PE=1 SV=2         | FXR2_HUMAN       | 74 kDa  | 99%  |



|     |                                                                                           |                  |         |      |
|-----|-------------------------------------------------------------------------------------------|------------------|---------|------|
| 312 | Elongation factor 1-beta OS=Homo sapiens GN=EEF1B2 PE=1 SV=3                              | EF1B_HUMAN       | 25 kDa  | 99%  |
| 313 | Keratin, type II cytoskeletal 1 OS=Homo sapiens GN=KRT1 PE=1 SV=6                         | K2C1_HUMAN       | 66 kDa  | 99%  |
| 314 | Coatomer subunit beta' OS=Homo sapiens GN=COPB2 PE=1 SV=2                                 | COPB2_HUMAN      | 102 kDa | 99%  |
| 315 | Myosin regulatory light chain 12A OS=Homo sapiens GN=MYL12A PE=1 SV=2                     | ML12A_HUMAN (+1) | 20 kDa  | 98%  |
| 316 | Ras-related protein Rab-1A OS=Homo sapiens GN=RAB1A PE=1 SV=3                             | RAB1A_HUMAN      | 23 kDa  | 98%  |
| 317 | Kynurenine 3-monooxygenase OS=Homo sapiens GN=KMO PE=1 SV=2                               | KMO_HUMAN        | 56 kDa  | 97%  |
| 318 | ATP synthase subunit d, mitochondrial OS=Homo sapiens GN=ATP5H PE=1 SV=3                  | ATP5H_HUMAN      | 18 kDa  | 97%  |
| 319 | Transformer-2 protein homolog beta OS=Homo sapiens GN=TRA2B PE=1 SV=1                     | TRA2B_HUMAN      | 34 kDa  | 97%  |
| 320 | Density-regulated protein OS=Homo sapiens GN=DENR PE=1 SV=2                               | DENR_HUMAN       | 22 kDa  | 97%  |
| 321 | Developmentally-regulated GTP-binding protein 1 OS=Homo sapiens GN=DRG1 PE=1 SV=1         | DRG1_HUMAN       | 41 kDa  | 97%  |
| 322 | Peroxiredoxin-1 OS=Homo sapiens GN=PRDX1 PE=1 SV=1                                        | PRDX1_HUMAN (+1) | 22 kDa  | 96%  |
| 323 | Hematological and neurological expressed 1 protein OS=Homo sapiens GN=HN1 PE=1 SV=3       | HN1_HUMAN        | 16 kDa  | 91%  |
| 324 | ATP-citrate synthase OS=Homo sapiens GN=ACLY PE=1 SV=3                                    | ACLY_HUMAN       | 121 kDa | 100% |
| 325 | DnaJ homolog subfamily B member 11 OS=Homo sapiens GN=DNAJB11 PE=1 SV=1                   | DJB11_HUMAN      | 41 kDa  | 100% |
| 326 | Eukaryotic translation initiation factor 3 subunit G OS=Homo sapiens GN=EIF3G PE=1 SV=2   | EIF3G_HUMAN      | 36 kDa  | 100% |
| 327 | Keratin, type I cytoskeletal 9 OS=Homo sapiens GN=KRT9 PE=1 SV=3                          | K1C9_HUMAN       | 62 kDa  | 100% |
| 328 | Rho-related GTP-binding protein RhoB OS=Homo sapiens GN=RHOB PE=1 SV=1                    | RHOB_HUMAN       | 22 kDa  | 100% |
| 329 | Splicing factor 3B subunit 1 OS=Homo sapiens GN=SF3B1 PE=1 SV=3                           | SF3B1_HUMAN      | 146 kDa | 100% |
| 330 | Dynamamin-like 120 kDa protein, mitochondrial OS=Homo sapiens GN=OPA1 PE=1 SV=3           | OPA1_HUMAN       | 112 kDa | 100% |
| 331 | Zinc finger protein 207 OS=Homo sapiens GN=ZNF207 PE=1 SV=1                               | ZN207_HUMAN      | 51 kDa  | 100% |
| 332 | Protein LSM14 homolog B OS=Homo sapiens GN=LSM14B PE=1 SV=1                               | LS14B_HUMAN      | 42 kDa  | 100% |
| 333 | Cytosol aminopeptidase OS=Homo sapiens GN=LAP3 PE=1 SV=3                                  | AMPL_HUMAN       | 56 kDa  | 100% |
| 334 | Protein 4.1 OS=Homo sapiens GN=EPB41 PE=1 SV=4                                            | 41_HUMAN         | 97 kDa  | 100% |
| 335 | Periplakin OS=Homo sapiens GN=PPL PE=1 SV=4                                               | PEPL_HUMAN       | 205 kDa | 100% |
| 336 | Cytochrome b-c1 complex subunit Rieske, mitochondrial OS=Homo sapiens GN=UQCRC1 PE=1 SV=2 | UCRI_HUMAN       | 30 kDa  | 99%  |
| 337 | tRNA (cytosine(34)-C(5))-methyltransferase OS=Homo sapiens GN=NSUN2 PE=1 SV=2             | NSUN2_HUMAN      | 86 kDa  | 99%  |

|     |                                                                                                                                                    |                  |         |     |
|-----|----------------------------------------------------------------------------------------------------------------------------------------------------|------------------|---------|-----|
| 338 | Glucose-6-phosphate isomerase OS=Homo sapiens GN=GPI PE=1 SV=4                                                                                     | G6PI_HUMAN       | 63 kDa  | 99% |
| 339 | Heterogeneous nuclear ribonucleoprotein A/B OS=Homo sapiens GN=HNRNPAB PE=1 SV=2                                                                   | ROAA_HUMAN       | 36 kDa  | 99% |
| 340 | Echinoderm microtubule-associated protein-like 4 OS=Homo sapiens GN=EML4 PE=1 SV=3                                                                 | EMAL4_HUMAN      | 109 kDa | 99% |
| 341 | Heme-binding protein 1 OS=Homo sapiens GN=HEBP1 PE=1 SV=1                                                                                          | HEBP1_HUMAN      | 21 kDa  | 99% |
| 342 | Proactivator polypeptide OS=Homo sapiens GN=PSAP PE=1 SV=2                                                                                         | SAP_HUMAN        | 58 kDa  | 99% |
| 343 | Synaptotagmin-like protein 2 OS=Homo sapiens GN=SYTL2 PE=1 SV=3                                                                                    | SYTL2_HUMAN      | 105 kDa | 99% |
| 344 | Ubiquitin carboxyl-terminal hydrolase 5 OS=Homo sapiens GN=USP5 PE=1 SV=2                                                                          | UBP5_HUMAN       | 96 kDa  | 99% |
| 345 | A-kinase anchor protein 8 OS=Homo sapiens GN=AKAP8 PE=1 SV=1                                                                                       | AKAP8_HUMAN      | 76 kDa  | 99% |
| 346 | Annexin A1 OS=Homo sapiens GN=ANXA1 PE=1 SV=2                                                                                                      | ANXA1_HUMAN      | 39 kDa  | 99% |
| 347 | AP-1 complex subunit sigma-1A OS=Homo sapiens GN=AP1S1 PE=1 SV=1                                                                                   | AP1S1_HUMAN      | 19 kDa  | 99% |
| 348 | Large proline-rich protein BAG6 OS=Homo sapiens GN=BAG6 PE=1 SV=2                                                                                  | BAG6_HUMAN       | 119 kDa | 99% |
| 349 | Copper chaperone for superoxide dismutase OS=Homo sapiens GN=CCS PE=1 SV=1                                                                         | CCS_HUMAN        | 29 kDa  | 99% |
| 350 | Charged multivesicular body protein 2a OS=Homo sapiens GN=CHMP2A PE=1 SV=1                                                                         | CHM2A_HUMAN      | 25 kDa  | 99% |
| 351 | Dynactin subunit 2 OS=Homo sapiens GN=DCTN2 PE=1 SV=4                                                                                              | DCTN2_HUMAN      | 44 kDa  | 99% |
| 352 | ERO1-like protein alpha OS=Homo sapiens GN=ERO1L PE=1 SV=2                                                                                         | ERO1A_HUMAN      | 54 kDa  | 99% |
| 353 | Redox-regulatory protein FAM213A OS=Homo sapiens GN=FAM213A PE=1 SV=3                                                                              | F213A_HUMAN      | 26 kDa  | 99% |
| 354 | Peptidyl-prolyl cis-trans isomerase FKBP5 OS=Homo sapiens GN=FKBP5 PE=1 SV=2                                                                       | FKBP5_HUMAN      | 51 kDa  | 99% |
| 355 | Glutamine--fructose-6-phosphate aminotransferase [isomerizing] 1 OS=Homo sapiens GN=GFPT1 PE=1 SV=3                                                | GFPT1_HUMAN      | 79 kDa  | 99% |
| 356 | Histone H2A.V OS=Homo sapiens GN=H2AFV PE=1 SV=3                                                                                                   | H2AV_HUMAN (+1)  | 14 kDa  | 99% |
| 357 | Histone H4 OS=Homo sapiens GN=HIST1H4A PE=1 SV=2                                                                                                   | H4_HUMAN         | 11 kDa  | 99% |
| 358 | Heterogeneous nuclear ribonucleoprotein F OS=Homo sapiens GN=HNRNPF PE=1 SV=3                                                                      | HNRPF_HUMAN      | 46 kDa  | 99% |
| 359 | Matrin-3 OS=Homo sapiens GN=MATR3 PE=1 SV=2                                                                                                        | MATR3_HUMAN      | 95 kDa  | 99% |
| 360 | Nucleosome assembly protein 1-like 4 OS=Homo sapiens GN=NAP1L4 PE=1 SV=1                                                                           | NP1L4_HUMAN (+1) | 43 kDa  | 99% |
| 361 | Dihydrolipoyllysine-residue succinyltransferase component of 2-oxoglutarate dehydrogenase complex, mitochondrial OS=Homo sapiens GN=DLST PE=1 SV=4 | ODO2_HUMAN       | 49 kDa  | 99% |
| 362 | Serine/threonine-protein kinase OSR1 OS=Homo sapiens GN=OXSR1 PE=1 SV=1                                                                            | OXSR1_HUMAN      | 58 kDa  | 99% |

|     |                                                                                                            |                  |         |     |
|-----|------------------------------------------------------------------------------------------------------------|------------------|---------|-----|
| 363 | 26S proteasome non-ATPase regulatory subunit 4 OS=Homo sapiens GN=PSMD4 PE=1 SV=1                          | PSMD4_HUMAN      | 41 kDa  | 99% |
| 364 | Histone-binding protein RBBP4 OS=Homo sapiens GN=RBBP4 PE=1 SV=3                                           | RBBP4_HUMAN      | 48 kDa  | 99% |
| 365 | Protein RER1 OS=Homo sapiens GN=RER1 PE=1 SV=1                                                             | RER1_HUMAN       | 23 kDa  | 99% |
| 366 | 60S ribosomal protein L14 OS=Homo sapiens GN=RPL14 PE=1 SV=4                                               | RL14_HUMAN       | 23 kDa  | 99% |
| 367 | 39S ribosomal protein L41, mitochondrial OS=Homo sapiens GN=MRPL41 PE=1 SV=1                               | RM41_HUMAN       | 15 kDa  | 99% |
| 368 | 40S ribosomal protein S8 OS=Homo sapiens GN=RPS8 PE=1 SV=2                                                 | RS8_HUMAN        | 24 kDa  | 99% |
| 369 | Small glutamine-rich tetratricopeptide repeat-containing protein alpha OS=Homo sapiens GN=SGTA PE=1 SV=1   | SGTA_HUMAN       | 34 kDa  | 99% |
| 370 | Superoxide dismutase [Cu-Zn] OS=Homo sapiens GN=SOD1 PE=1 SV=2                                             | SODC_HUMAN       | 16 kDa  | 99% |
| 371 | Valine--tRNA ligase OS=Homo sapiens GN=VAR5 PE=1 SV=4                                                      | SYVC_HUMAN       | 140 kDa | 99% |
| 372 | Protein YIPF3 OS=Homo sapiens GN=YIPF3 PE=1 SV=1                                                           | YIPF3_HUMAN      | 38 kDa  | 99% |
| 373 | Scaffold attachment factor B2 OS=Homo sapiens GN=SAFB2 PE=1 SV=1                                           | SAFB2_HUMAN      | 107 kDa | 99% |
| 374 | Dolichyl-diphosphooligosaccharide--protein glycosyltransferase subunit 2 OS=Homo sapiens GN=RPN2 PE=1 SV=3 | RPN2_HUMAN       | 69 kDa  | 99% |
| 375 | Twinfilin-1 OS=Homo sapiens GN=TWFI PE=1 SV=3                                                              | TWFI_HUMAN       | 40 kDa  | 99% |
| 376 | UV excision repair protein RAD23 homolog B OS=Homo sapiens GN=RAD23B PE=1 SV=1                             | RD23B_HUMAN      | 43 kDa  | 99% |
| 377 | Spectrin beta chain, non-erythrocytic 4 OS=Homo sapiens GN=SPTBN4 PE=1 SV=2                                | SPTN4_HUMAN      | 289 kDa | 99% |
| 378 | Transmembrane emp24 domain-containing protein 9 OS=Homo sapiens GN=TMED9 PE=1 SV=2                         | TMED9_HUMAN      | 27 kDa  | 99% |
| 379 | Desmoplakin OS=Homo sapiens GN=DSP PE=1 SV=3                                                               | DESP_HUMAN       | 332 kDa | 99% |
| 380 | Hsc70-interacting protein OS=Homo sapiens GN=ST13 PE=1 SV=2                                                | F10A1_HUMAN (+1) | 41 kDa  | 99% |
| 381 | V-type proton ATPase catalytic subunit A OS=Homo sapiens GN=ATP6V1A PE=1 SV=2                              | VATA_HUMAN       | 68 kDa  | 99% |
| 382 | Stress-induced-phosphoprotein 1 OS=Homo sapiens GN=STIP1 PE=1 SV=1                                         | STIP1_HUMAN      | 63 kDa  | 99% |
| 383 | Poly [ADP-ribose] polymerase 1 OS=Homo sapiens GN=PARP1 PE=1 SV=4                                          | PARP1_HUMAN      | 113 kDa | 98% |
| 384 | Cation-dependent mannose-6-phosphate receptor OS=Homo sapiens GN=M6PR PE=1 SV=1                            | MPRD_HUMAN       | 31 kDa  | 98% |
| 385 | M-phase phosphoprotein 8 OS=Homo sapiens GN=MPHOSPH8 PE=1 SV=2                                             | MPP8_HUMAN       | 97 kDa  | 98% |
| 386 | Carbonic anhydrase 2 OS=Homo sapiens GN=CA2 PE=1 SV=2                                                      | CAH2_HUMAN       | 29 kDa  | 98% |
| 387 | Ras-related protein Rab-7a OS=Homo sapiens GN=RAB7A PE=1 SV=1                                              | RAB7A_HUMAN      | 23 kDa  | 98% |
| 388 | N-acetyl-D-glucosamine kinase OS=Homo sapiens GN=NAGK PE=1 SV=4                                            | NAGK_HUMAN       | 37 kDa  | 98% |

|     |                                                                                                                |              |         |     |
|-----|----------------------------------------------------------------------------------------------------------------|--------------|---------|-----|
| 389 | Electron transfer flavoprotein subunit alpha, mitochondrial OS=Homo sapiens GN=ETFA PE=1 SV=1                  | ETFA_HUMAN   | 35 kDa  | 98% |
| 390 | Coatomer subunit epsilon OS=Homo sapiens GN=COPE PE=1 SV=3                                                     | COPE_HUMAN   | 34 kDa  | 98% |
| 391 | Eukaryotic translation initiation factor 4E OS=Homo sapiens GN=EIF4E PE=1 SV=2                                 | IF4E_HUMAN   | 25 kDa  | 97% |
| 392 | Eukaryotic translation initiation factor 3 subunit J OS=Homo sapiens GN=EIF3J PE=1 SV=2                        | EIF3J_HUMAN  | 29 kDa  | 97% |
| 393 | N-acetyltransferase 10 OS=Homo sapiens GN=NAT10 PE=1 SV=2                                                      | NAT10_HUMAN  | 116 kDa | 97% |
| 394 | Small nuclear ribonucleoprotein Sm D2 OS=Homo sapiens GN=SNRPD2 PE=1 SV=1                                      | SMD2_HUMAN   | 14 kDa  | 97% |
| 395 | 60S ribosomal protein L22 OS=Homo sapiens GN=RPL22 PE=1 SV=2                                                   | RL22_HUMAN   | 15 kDa  | 96% |
| 396 | 60S ribosomal protein L19 OS=Homo sapiens GN=RPL19 PE=1 SV=1                                                   | RL19_HUMAN   | 23 kDa  | 96% |
| 397 | Tax1-binding protein 3 OS=Homo sapiens GN=TAX1BP3 PE=1 SV=2                                                    | TX1B3_HUMAN  | 14 kDa  | 96% |
| 398 | Sorting nexin-3 OS=Homo sapiens GN=SNX3 PE=1 SV=3                                                              | SNX3_HUMAN   | 19 kDa  | 96% |
| 399 | Proliferating cell nuclear antigen OS=Homo sapiens GN=PCNA PE=1 SV=1                                           | PCNA_HUMAN   | 29 kDa  | 95% |
| 400 | Ornithine aminotransferase, mitochondrial OS=Homo sapiens GN=OAT PE=1 SV=1                                     | OAT_HUMAN    | 49 kDa  | 95% |
| 401 | 26S proteasome non-ATPase regulatory subunit 12 OS=Homo sapiens GN=PSMD12 PE=1 SV=3                            | PSD12_HUMAN  | 53 kDa  | 95% |
| 402 | Putative nascent polypeptide-associated complex subunit alpha-like protein OS=Homo sapiens GN=NACAP1 PE=5 SV=1 | NACAP1_HUMAN | 23 kDa  | 95% |
| 403 | Apoptosis inhibitor 5 OS=Homo sapiens GN=API5 PE=1 SV=3                                                        | API5_HUMAN   | 59 kDa  | 95% |
| 404 | Serpin H1 OS=Homo sapiens GN=SERPINH1 PE=1 SV=2                                                                | SERPH_HUMAN  | 46 kDa  | 94% |
| 405 | UDP-N-acetylglucosamine transferase subunit ALG14 homolog OS=Homo sapiens GN=ALG14 PE=2 SV=1                   | ALG14_HUMAN  | 24 kDa  | 90% |
| 406 | Cofilin-1 OS=Homo sapiens GN=CFL1 PE=1 SV=3                                                                    | COF1_HUMAN   | 19 kDa  | 99% |
| 407 | Coatomer subunit zeta-1 OS=Homo sapiens GN=COPZ1 PE=1 SV=1                                                     | COPZ1_HUMAN  | 20 kDa  | 99% |
| 408 | Cytochrome c oxidase subunit 5B, mitochondrial OS=Homo sapiens GN=COX5B PE=1 SV=2                              | COX5B_HUMAN  | 14 kDa  | 99% |
| 409 | ATP-dependent RNA helicase DDX1 OS=Homo sapiens GN=DDX1 PE=1 SV=2                                              | DDX1_HUMAN   | 82 kDa  | 99% |
| 410 | Epidermal growth factor receptor kinase substrate 8-like protein 1 OS=Homo sapiens GN=EPS8L1 PE=1 SV=3         | ES8L1_HUMAN  | 80 kDa  | 99% |
| 411 | RNA-binding protein FUS OS=Homo sapiens GN=FUS PE=1 SV=1                                                       | FUS_HUMAN    | 53 kDa  | 99% |
| 412 | Rab GDP dissociation inhibitor alpha OS=Homo sapiens GN=GDI1 PE=1 SV=2                                         | GDIA_HUMAN   | 51 kDa  | 99% |
| 413 | Importin-7 OS=Homo sapiens GN=IPO7 PE=1 SV=1                                                                   | IPO7_HUMAN   | 120 kDa | 99% |
| 414 | Opioid growth factor receptor OS=Homo sapiens GN=OGFR PE=1 SV=3                                                | OGFR_HUMAN   | 73 kDa  | 99% |

|     |                                                                                           |             |         |     |
|-----|-------------------------------------------------------------------------------------------|-------------|---------|-----|
| 415 | Membrane-associated progesterone receptor component 1 OS=Homo sapiens GN=PGRMC1 PE=1 SV=3 | PGRC1_HUMAN | 22 kDa  | 99% |
| 416 | Prolactin regulatory element-binding protein OS=Homo sapiens GN=PREB PE=1 SV=2            | PREB_HUMAN  | 45 kDa  | 99% |
| 417 | Rab11 family-interacting protein 1 OS=Homo sapiens GN=RAB11FIP1 PE=1 SV=2                 | RFIP1_HUMAN | 137 kDa | 99% |
| 418 | 60S ribosomal protein L35a OS=Homo sapiens GN=RPL35A PE=1 SV=2                            | RL35A_HUMAN | 13 kDa  | 99% |
| 419 | Lysosome membrane protein 2 OS=Homo sapiens GN=SCARB2 PE=1 SV=2                           | SCRB2_HUMAN | 54 kDa  | 99% |
| 420 | Alpha-soluble NSF attachment protein OS=Homo sapiens GN=NAPA PE=1 SV=3                    | SNAA_HUMAN  | 33 kDa  | 99% |
| 421 | Asparagine--tRNA ligase, cytoplasmic OS=Homo sapiens GN=NARS PE=1 SV=1                    | SYNC_HUMAN  | 63 kDa  | 99% |
| 422 | Transketolase OS=Homo sapiens GN=TKT PE=1 SV=3                                            | TKT_HUMAN   | 68 kDa  | 99% |
| 423 | E3 UFM1-protein ligase 1 OS=Homo sapiens GN=UFL1 PE=1 SV=2                                | UFL1_HUMAN  | 90 kDa  | 99% |
| 424 | Vacuolar protein sorting-associated protein 37A OS=Homo sapiens GN=VPS37A PE=1 SV=1       | VP37A_HUMAN | 44 kDa  | 99% |
| 425 | AN1-type zinc finger protein 6 OS=Homo sapiens GN=ZFAND6 PE=1 SV=2                        | ZFAN6_HUMAN | 23 kDa  | 99% |
| 426 | Ubiquitin thioesterase OTUB1 OS=Homo sapiens GN=OTUB1 PE=1 SV=2                           | OTUB1_HUMAN | 31 kDa  | 99% |
| 427 | ATP synthase-coupling factor 6, mitochondrial OS=Homo sapiens GN=ATP5J PE=1 SV=1          | ATP5J_HUMAN | 13 kDa  | 99% |
| 428 | Glia maturation factor beta OS=Homo sapiens GN=GMFB PE=1 SV=2                             | GMFB_HUMAN  | 17 kDa  | 99% |
| 429 | Coiled-coil and C2 domain-containing protein 1A OS=Homo sapiens GN=CC2D1A PE=1 SV=1       | C2D1A_HUMAN | 104 kDa | 99% |
| 430 | Regulator of microtubule dynamics protein 1 OS=Homo sapiens GN=RMDN1 PE=1 SV=1            | RMD1_HUMAN  | 36 kDa  | 98% |
| 431 | Kynureninase OS=Homo sapiens GN=KYNU PE=1 SV=1                                            | KYNU_HUMAN  | 52 kDa  | 98% |
| 432 | Coiled-coil domain-containing protein 47 OS=Homo sapiens GN=CCDC47 PE=1 SV=1              | CCD47_HUMAN | 56 kDa  | 98% |
| 433 | Acyl-CoA desaturase OS=Homo sapiens GN=SCD PE=1 SV=2                                      | ACOD_HUMAN  | 42 kDa  | 98% |
| 434 | 60S ribosomal protein L31 OS=Homo sapiens GN=RPL31 PE=1 SV=1                              | RL31_HUMAN  | 14 kDa  | 98% |
| 435 | Protein arginine N-methyltransferase 5 OS=Homo sapiens GN=PRMT5 PE=1 SV=4                 | ANM5_HUMAN  | 73 kDa  | 98% |
| 436 | Glutathione S-transferase kappa 1 OS=Homo sapiens GN=GSTK1 PE=1 SV=3                      | GSTK1_HUMAN | 25 kDa  | 98% |
| 437 | Survival of motor neuron-related-splicing factor 30 OS=Homo sapiens GN=SMNDC1 PE=1 SV=1   | SPF30_HUMAN | 27 kDa  | 98% |
| 438 | RuvB-like 1 OS=Homo sapiens GN=RUVBL1 PE=1 SV=1                                           | RUVB1_HUMAN | 50 kDa  | 97% |
| 439 | Basic leucine zipper and W2 domain-containing protein 2 OS=Homo sapiens GN=BZW2 PE=1 SV=1 | BZW2_HUMAN  | 48 kDa  | 97% |
| 440 | ADP-ribosylation factor GTPase-activating protein 1 OS=Homo sapiens GN=ARFGAP1 PE=1 SV=2  | ARFG1_HUMAN | 45 kDa  | 97% |

|     |                                                                                                                                    |                |         |     |
|-----|------------------------------------------------------------------------------------------------------------------------------------|----------------|---------|-----|
| 441 | E3 ubiquitin/ISG15 ligase TRIM25 OS=Homo sapiens GN=TRIM25 PE=1 SV=2                                                               | TRI25_HUMAN    | 71 kDa  | 96% |
| 442 | FAD-linked sulfhydryl oxidase ALR OS=Homo sapiens GN=GFER PE=1 SV=2                                                                | ALR_HUMAN      | 23 kDa  | 96% |
| 443 | Synapse-associated protein 1 OS=Homo sapiens GN=SYAP1 PE=1 SV=1                                                                    | SYAP1_HUMAN    | 40 kDa  | 96% |
| 444 | Single-stranded DNA-binding protein, mitochondrial OS=Homo sapiens GN=SSBP1 PE=1 SV=1                                              | SSBP_HUMAN     | 17 kDa  | 96% |
| 445 | Septin-11 OS=Homo sapiens GN=SEPT11 PE=1 SV=3                                                                                      | SEP11_HUMAN    | 49 kDa  | 96% |
| 446 | Isoamyl acetate-hydrolyzing esterase 1 homolog OS=Homo sapiens GN=IAH1 PE=1 SV=1                                                   | IAH1_HUMAN     | 28 kDa  | 96% |
| 447 | Probable ATP-dependent RNA helicase DHX36 OS=Homo sapiens GN=DHX36 PE=1 SV=2                                                       | DHX36_HUMAN    | 115 kDa | 96% |
| 448 | Nuclear cap-binding protein subunit 1 OS=Homo sapiens GN=NCBP1 PE=1 SV=1                                                           | NCBP1_HUMAN    | 92 kDa  | 96% |
| 449 | 26S proteasome non-ATPase regulatory subunit 7 OS=Homo sapiens GN=PSMD7 PE=1 SV=2                                                  | PSD7_HUMAN     | 37 kDa  | 96% |
| 450 | High mobility group protein B1 OS=Homo sapiens GN=HMGB1 PE=1 SV=3                                                                  | HMGB1_HUMAN    | 25 kDa  | 96% |
| 451 | Ras-related protein Rab-3D OS=Homo sapiens GN=RAB3D PE=1 SV=1                                                                      | RAB3D_HUMAN    | 24 kDa  | 95% |
| 452 | N-acylneuraminate-9-phosphatase OS=Homo sapiens GN=NANP PE=1 SV=1                                                                  | NANP_HUMAN     | 28 kDa  | 95% |
| 453 | Charged multivesicular body protein 7 OS=Homo sapiens GN=CHMP7 PE=1 SV=1                                                           | CHMP7_HUMAN    | 51 kDa  | 95% |
| 454 | SWI/SNF-related matrix-associated actin-dependent regulator of chromatin subfamily B member 1 OS=Homo sapiens GN=SMARCB1 PE=1 SV=2 | SNF5_HUMAN     | 44 kDa  | 95% |
| 455 | Histone H1.4 OS=Homo sapiens GN=HIST1H1E PE=1 SV=2                                                                                 | H14_HUMAN (+1) | 22 kDa  | 95% |
| 456 | Citrate synthase, mitochondrial OS=Homo sapiens GN=CS PE=1 SV=2                                                                    | CISY_HUMAN     | 52 kDa  | 95% |
| 457 | Ras-related protein Rab-14 OS=Homo sapiens GN=RAB14 PE=1 SV=4                                                                      | RAB14_HUMAN    | 24 kDa  | 95% |
| 458 | Serine/arginine repetitive matrix protein 1 OS=Homo sapiens GN=SRRM1 PE=1 SV=2                                                     | SRRM1_HUMAN    | 102 kDa | 95% |
| 459 | Exocyst complex component 8 OS=Homo sapiens GN=EXOC8 PE=1 SV=2                                                                     | EXOC8_HUMAN    | 82 kDa  | 94% |
| 460 | Tumor necrosis factor receptor type 1-associated DEATH domain protein OS=Homo sapiens GN=TRADD PE=1 SV=2                           | TRADD_HUMAN    | 34 kDa  | 94% |
| 461 | Vacuolar protein sorting-associated protein 4A OS=Homo sapiens GN=VPS4A PE=1 SV=1                                                  | VPS4A_HUMAN    | 49 kDa  | 94% |
| 462 | Dynammin-2 OS=Homo sapiens GN=DNM2 PE=1 SV=2                                                                                       | DYN2_HUMAN     | 98 kDa  | 93% |
| 463 | 28S ribosomal protein S27, mitochondrial OS=Homo sapiens GN=MRPS27 PE=1 SV=3                                                       | RT27_HUMAN     | 48 kDa  | 93% |
| 464 | Nuclear factor of activated T-cells, cytoplasmic 3 OS=Homo sapiens GN=NFATC3 PE=1 SV=1                                             | NFAC3_HUMAN    | 116 kDa | 91% |
| 465 | Trans-acting T-cell-specific transcription factor GATA-3 OS=Homo sapiens GN=GATA3 PE=1 SV=1                                        | GATA3_HUMAN    | 48 kDa  | 91% |

|     |                                                                                             |             |         |     |
|-----|---------------------------------------------------------------------------------------------|-------------|---------|-----|
| 466 | Microtubule-associated serine/threonine-protein kinase 2 OS=Homo sapiens GN=MAST2 PE=1 SV=2 | MAST2_HUMAN | 196 kDa | 90% |
| 467 | Epithelial cell adhesion molecule OS=Homo sapiens GN=EPCAM PE=1 SV=2                        | EPCAM_HUMAN | 35 kDa  | 89% |
| 468 | Splicing factor 3B subunit 4 OS=Homo sapiens GN=SF3B4 PE=1 SV=1                             | SF3B4_HUMAN | 44 kDa  | 89% |
| 469 | Cytosolic carboxypeptidase 2 OS=Homo sapiens GN=AGBL2 PE=2 SV=2                             | CBPC2_HUMAN | 104 kDa | 89% |

---

**Table S3 Differentially expressed proteins in Cos, Dehy, CD, and VOSL treated groups**

| Cos vs Control |                         |         | Dehy vs Control |                         |         | CD vs Control |                         |         | VOSL vs Control |                         |         |
|----------------|-------------------------|---------|-----------------|-------------------------|---------|---------------|-------------------------|---------|-----------------|-------------------------|---------|
| ID             | Type(s)                 | Log2 FC | ID              | Type(s)                 | Log2 FC | ID            | Type(s)                 | Log2 FC | ID              | Type(s)                 | Log2 FC |
| ACTR3          | other                   | -1.0    | ACOT7           | enzyme                  | 0.8     | AKAP8         | other                   | -1.0    | API5            | other                   | -2.5    |
| ALDOA          | enzyme                  | -0.8    | AGR2            | other                   | -0.9    | API5          | other                   | -1.6    | ALG14           | enzyme                  | 0.6     |
| APEX1          | enzyme                  | -0.8    | AKAP8           | other                   | 1.0     | ATP5J         | transporter             | -0.8    | AKAP8           | other                   | -0.7    |
| ATIC           | enzyme                  | 0.6     | API5            | other                   | -2.6    | BASP1         | transcription regulator | 0.6     | ATP5C1          | transporter             | 0.9     |
| ATP5C1         | transporter             | -0.6    | ATP5H           | enzyme                  | -0.6    | BZW2          | translation regulator   | 0.7     | ATP5J           | transporter             | -0.7    |
| ATP5I          | transporter             | -0.6    | BASP1           | transcription regulator | 0.6     | CFL1          | other                   | -0.6    | BID             | other                   | -0.8    |
| BOLA2/BOLA2B   | other                   | -0.6    | BID             | other                   | -0.6    | CS            | enzyme                  | -0.7    | CAPN1           | peptidase               | -0.9    |
| C1QBP          | transcription regulator | -1.3    | CCDC47          | other                   | -0.6    | DENR          | other                   | -0.6    | DNAJB11         | other                   | 1.1     |
| CAPN1          | peptidase               | 0.8     | CFL1            | other                   | -0.7    | EIF4G1        | translation regulator   | -0.9    | EIF4G1          | translation regulator   | -0.7    |
| CARHSP1        | other                   | -0.6    | CHMP7           | transporter             | -0.9    | EPCAM         | other                   | -0.7    | FLNB            | other                   | -0.7    |
| CCDC90B        | other                   | -2.5    | DPP3            | peptidase               | -0.8    | FLNB          | other                   | -0.8    | FRYL            | other                   | -0.7    |
| CCT2           | kinase                  | -1.3    | EIF6            | translation regulator   | -1.0    | GFER          | enzyme                  | -1.3    | GATA3           | transcription regulator | -1.0    |
| CD2BP2         | other                   | 0.6     | EPB41           | other                   | 0.7     | GNB2L1        | enzyme                  | -0.9    | GEMIN5          | other                   | -0.8    |
| CLIC1          | ion channel             | -1.7    | EPS8L1          | other                   | 0.6     | HNRNPU        | transporter             | -0.7    | GNB2L1          | enzyme                  | -0.8    |
| CLTC           | other                   | -2.4    | EZR             | other                   | -0.8    | HSPH1         | other                   | -0.9    | HDLBP           | transporter             | -0.7    |
| COL1A1         | other                   | 0.7     | FAM213A         | other                   | -1.6    | KMO           | enzyme                  | 0.9     | HIST1H1E        | other                   | 0.7     |
| EIF6           | translation regulator   | 1.6     | FASN            | enzyme                  | -0.7    | KRT1          | other                   | 0.7     | HSPB8           | kinase                  | -0.6    |
| FAM162A        | other                   | 0.6     | GFER            | enzyme                  | 0.6     | LUC7L2        | other                   | 0.8     | KMO             | enzyme                  | 0.9     |
| FAM21A/FAM21C  | other                   | -1.8    | GNB2L1          | enzyme                  | -1.4    | M6PR          | transporter             | 0.8     | LSM14B          | other                   | -0.6    |
| FXR1           | other                   | -2.6    | GSTK1           | enzyme                  | 0.9     | MAPT          | kinase                  | 0.8     | MARCKS          | other                   | -0.8    |
| GCN1L1         | translation regulator   | 1.5     | HID1            | other                   | 0.7     | MATR3         | other                   | -0.8    | MATR3           | other                   | -0.8    |
| GEMIN5         | other                   | 1.2     | HMGB1           | transcription regulator | 0.7     | ME1           | enzyme                  | 0.8     | MCCC1           | enzyme                  | -0.6    |



**Table S3 (Continued)**

| Cos vs Control |                         |         | Dehy vs Control |                         |         | CD vs Control |                         |         | VOSL vs Control |                         |         |
|----------------|-------------------------|---------|-----------------|-------------------------|---------|---------------|-------------------------|---------|-----------------|-------------------------|---------|
| ID             | Type(s)                 | Log2 FC | ID              | Type(s)                 | Log2 FC | ID            | Type(s)                 | Log2 FC | ID              | Type(s)                 | Log2 FC |
| GFPT1          | enzyme                  | 0.9     | HNRNPAB         | enzyme                  | -0.8    | NASP          | other                   | -0.6    | ME1             | enzyme                  | 1.0     |
| HNRNPA1L2      | other                   | -0.7    | HNRNPC          | other                   | -0.6    | NMD3          | other                   | -0.8    | NASP            | other                   | -0.7    |
| HSP90AB1       | enzyme                  | -1.2    | HSPB1           | other                   | 0.8     | PGK1          | kinase                  | -0.6    | NFATC3          | transcription regulator | -1.2    |
| HSPA4          | other                   | -0.7    | HSPH1           | other                   | -0.8    | PGK1          | kinase                  | -0.6    | NUCB1           | other                   | 0.7     |
| HSPB8          | kinase                  | 1.2     | LMNB1           | other                   | -0.7    | PGRMC1        | transmembrane receptor  | -0.7    | PA2G4           | transcription regulator | -0.7    |
| HSPD1          | enzyme                  | -1.0    | LUC7L2          | other                   | 1.4     | RANBP1        | other                   | -0.7    | PARP1           | enzyme                  | 0.7     |
| HYOU1          | other                   | -1.3    | MAPT            | kinase                  | 0.9     | RBM25         | other                   | -0.6    | PCNA            | enzyme                  | 0.7     |
| ILF3           | transcription regulator | -2.6    | NAP1L4          | other                   | -0.7    | RMDN1         | other                   | -0.6    | RBM25           | other                   | -0.8    |
| KMO            | enzyme                  | 0.7     | NFATC3          | transcription regulator | 0.8     | RPN2          | enzyme                  | -1.6    | RPN2            | enzyme                  | -2.1    |
| KRT19          | other                   | 0.7     | NUCB1           | other                   | 0.6     | SAFB          | other                   | -1.1    | SAFB            | other                   | -0.9    |
| LAP3           | peptidase               | 0.7     | PCNA            | enzyme                  | 0.7     | SCARB2        | other                   | 0.6     | SF3B3           | other                   | -0.6    |
| LIG1           | enzyme                  | 1.2     | PTGES3          | enzyme                  | 0.7     | SMARCA4       | transcription regulator | -0.6    | SFN             | other                   | 0.8     |
| LMAN2          | transporter             | 1.3     | RAB3D           | enzyme                  | -0.9    | TCOF1         | transporter             | -1.2    | SND1            | enzyme                  | -0.6    |
| LMNA           | other                   | 1.5     | RANBP1          | other                   | -0.8    | TFG           | other                   | 0.7     | SON             | other                   | -0.7    |
| LMNB1          | other                   | 0.7     | RDX             | other                   | -0.6    | TNPO2         | transporter             | -0.8    | SRRM2           | other                   | -0.9    |
| LRRC59         | other                   | 0.6     | RPN2            | enzyme                  | -2.8    | TRIM28        | transcription regulator | -2.0    | SSBP1           | other                   | 0.6     |
| MAPT           | kinase                  | 1.3     | SAFB            | other                   | -0.7    |               |                         |         | STMN1           | other                   | -0.6    |
| MRPL41         | other                   | -0.7    | SEC13           | transporter             | 0.6     |               |                         |         | TCOF1           | transporter             | -0.8    |
| MYH10          | other                   | -2.8    | SFN             | other                   | 1.7     |               |                         |         | TFG             | other                   | 1.0     |
| NCL            | other                   | -0.6    | SFPQ            | other                   | -0.6    |               |                         |         | TPI1            | enzyme                  | 1.1     |
| NEDD8          | enzyme                  | -0.6    | SMARCB1         | transcription regulator | -1.1    |               |                         |         | TXN             | enzyme                  | 0.6     |
| NPM1           | transcription regulator | -1.0    | SON             | other                   | -0.6    |               |                         |         | UBR4            | enzyme                  | -2.1    |

**Table S3 (Continued)**

| Cos vs Control |                         |         | Dehy vs Control |                         |         | CD vs Control |         |         | VOSL vs Control |             |         |
|----------------|-------------------------|---------|-----------------|-------------------------|---------|---------------|---------|---------|-----------------|-------------|---------|
| ID             | Type(s)                 | Log2 FC | ID              | Type(s)                 | Log2 FC | ID            | Type(s) | Log2 FC | ID              | Type(s)     | Log2 FC |
| OGFR           | other                   | 0.8     | SPAG9           | other                   | 0.6     |               |         |         | UQCRFS1         | enzyme      | -0.7    |
| PAWR           | transcription regulator | -0.6    | SRRM1           | other                   | 0.8     |               |         |         | VPS26A          | transporter | -0.6    |
| PFN1           | other                   | -0.8    | SSBP1           | other                   | 0.8     |               |         |         | ZFAND6          | other       | -0.9    |
| PGRMC1         | transmembrane receptor  | -2.4    | STMN1           | other                   | -0.8    |               |         |         |                 |             |         |
| PYGB           | enzyme                  | -1.0    | SYNCRIP         | other                   | -0.6    |               |         |         |                 |             |         |
| RPS17/RPS17L   | other                   | -1.0    | TCOF1           | transporter             | -0.7    |               |         |         |                 |             |         |
| RPS3           | enzyme                  | -0.8    | TFG             | other                   | 1.3     |               |         |         |                 |             |         |
| SAE1           | enzyme                  | -0.9    | TOP1            | enzyme                  | -0.7    |               |         |         |                 |             |         |
| SAMM50         | other                   | -1.0    | TPI1            | enzyme                  | 1.1     |               |         |         |                 |             |         |
| SEMA4C         | other                   | -1.2    | TUBB            | other                   | -0.7    |               |         |         |                 |             |         |
| SET            | phosphatase             | -0.9    | TUBB            | other                   | -0.7    |               |         |         |                 |             |         |
| SF3B3          | other                   | 0.9     | UQCRFS1         | enzyme                  | -1.0    |               |         |         |                 |             |         |
| SFN            | other                   | 2.0     | XRCC6           | enzyme                  | -0.6    |               |         |         |                 |             |         |
| SRRT           | other                   | 1.0     | YWHAB           | transcription regulator | 0.7     |               |         |         |                 |             |         |
| SRSF5          | other                   | -0.7    | YWHAZ           | enzyme                  | 0.6     |               |         |         |                 |             |         |
| STMN1          | other                   | -2.7    |                 |                         |         |               |         |         |                 |             |         |
| TPI1           | enzyme                  | -0.6    |                 |                         |         |               |         |         |                 |             |         |
| TRIM28         | transcription regulator | -1.2    |                 |                         |         |               |         |         |                 |             |         |
| TUBB           | other                   | -1.0    |                 |                         |         |               |         |         |                 |             |         |
| UQCRB          | enzyme                  | 0.7     |                 |                         |         |               |         |         |                 |             |         |
| XRCC6          | enzyme                  | 1.2     |                 |                         |         |               |         |         |                 |             |         |

**FC (fold change) = treated group / control group**

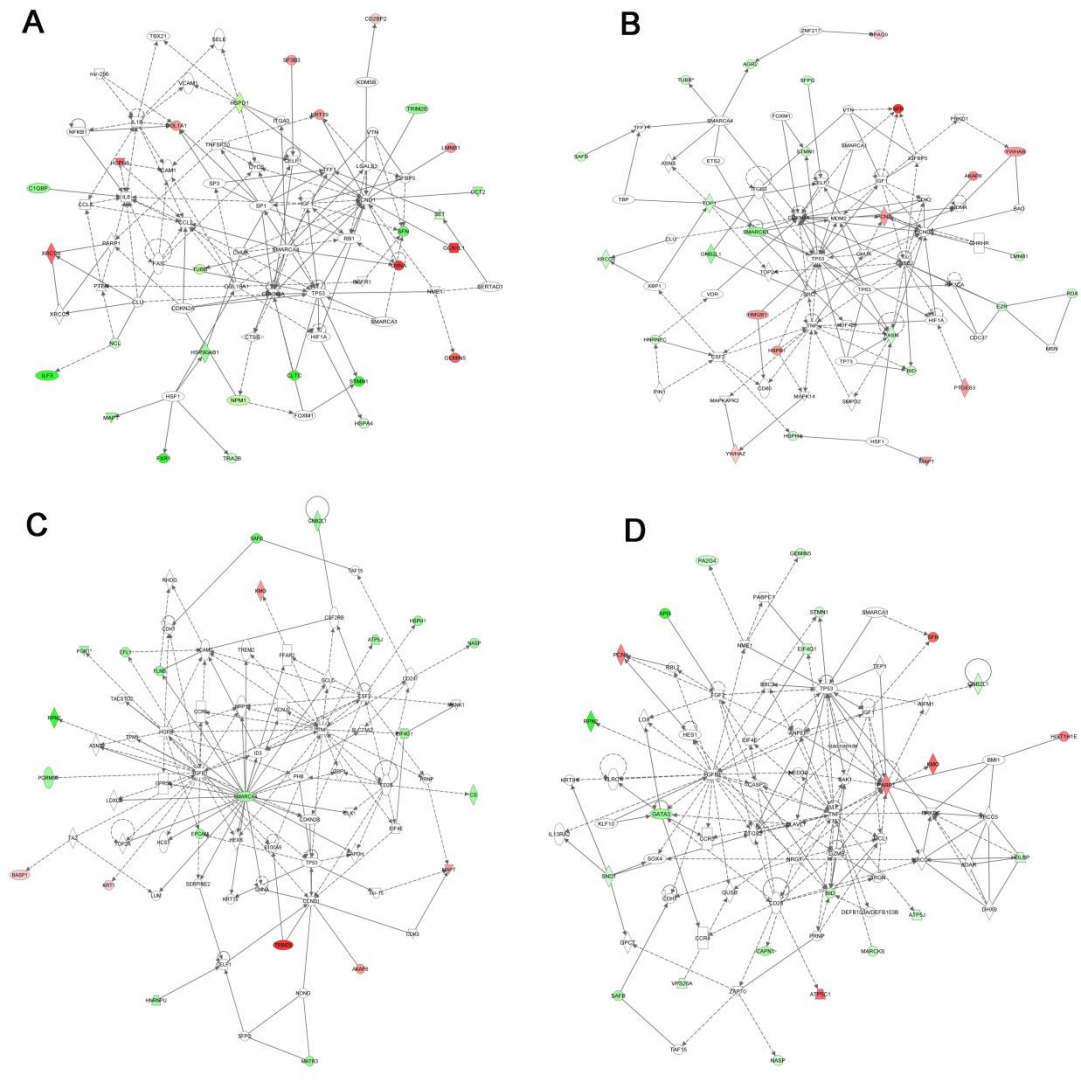

**Figure S1. The interaction networks of differentially expressed proteins in (A) Cos-treated group; (B) Dehy-treated group; (C) CD-treated group; (D) VOSL-treated group. Red color represents “up-regulated”; Green color represents “down-regulated”.**

The interaction networks of differentially expressed proteins in the Cos-treated group enriched 27 proteins (Fig. S1A), thereinto, 15 proteins, which were APEX1, C1QBP, COL1A1, FAM162A, FXR1, HSPB8, HSPD1, LMNA, MAPT, NPM1, PGRMC1, RPS3, SET, SFN, STMN1, involved in the physiologic functions of cell death and survival. The interaction networks of differentially expressed proteins in the Dehy-treated group enriched 26 proteins (Fig. S1B), of which there were 14 proteins, API5, BID, CFL1, EZR, FASN, GNB2L1, HMGB1, HSPB1, MAPT, SFN, SMARCB1, SON, TOP1 and YWHAZ, involved in the physiologic functions of cell death and survival. The interaction networks of differentially expressed proteins in the CD-treated group enriched 22 proteins (Fig. S1C), among which there were 4 proteins, MAPT, CFL1, FLNB and

SMARCA4, involved in the physiologic functions of cellular assembly, organization and cell cycle. The interaction networks in the VOSL-treated group enriched 23 differentially expressed proteins (Fig. S1D), in which there were 11 proteins, API5, BID, GNB2L1, HSPB8, PARP1, RBM25, SFN, SND1, SON, TXN and UBR4, involved in the physiologic functions of cell death and survival.

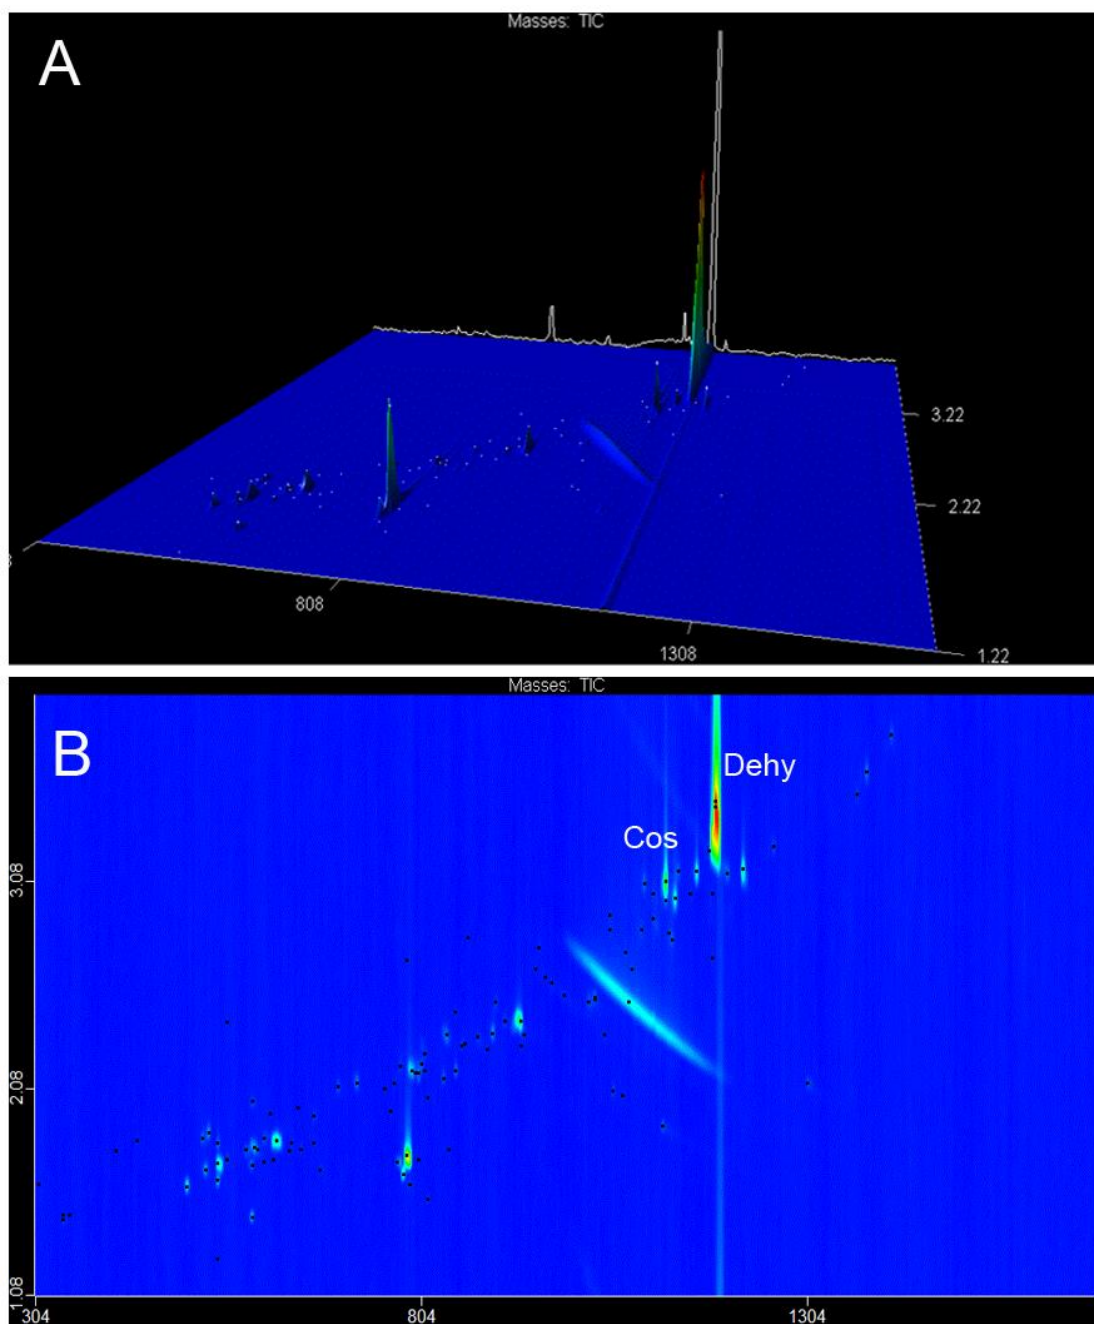

**Figure S2. (A) The total ion chromatogram (three dimension, 3D) of VOSL by comprehensive two-dimensional gas chromatography-time-of-flight mass spectrometry (GC×GC–TOF /MS), (B) The total ion chromatogram (two dimension, 2D) of VOSL by GC×GC–TOF/MS.**

Each 1  $\mu$ L aliquot of the VOSL solution (0.1 mg/mL in hexane) was injected in splitless mode into a Pegasus 4D GC×GC–TOF/MS system (LECO Corporation, St Joseph, MI,USA). Separation and analysis were performed on a comprehensive 2D gas chromatography. The first dimension (1D) column was a non-polar DB-5 capillary column (30 m×250  $\mu$ m I.D., J&W Scientific, Folsom, CA,

USA), coupled to a second dimension (2D) medium polarity DB-17 capillary column (1.8 m ×100 μm I.D., J&W Scientific, Folsom, CA, USA) by a glass union. The 2D column was held in a separate oven and maintained at a 5 ° C higher temperature than the 1D oven. The 2D separation run time was 4 s and was controlled with an internal cryogenic modulator. The analysis results revealed that the content of Cos and Dehy account for nearly 72% of VOSL. The details of constituents in VOSL were shown in **Table S4**

**Table S4 The main constituents of VOSL**

| Compound                        | Retention time (s)<br>(1D,2D) | Similarity | Unique Mass | Area % |
|---------------------------------|-------------------------------|------------|-------------|--------|
| Dehydro costuslactone           | 1184 , 3.470                  | 942        | 230         | 50.46  |
| Costunolide                     | 1072 , 2.500                  | 821        | 232         | 21.84  |
| Cyclotrisiloxane, hexamethyl-   | 1848 , 0.850                  | 922        | 207         | 10.40  |
| 9,12,15-Octadecatrienal         | 784 , 1.760                   | 842        | 79          | 4.17   |
| Oxacyclotetradeca-4,11-diyne    | 1120 , 3.080                  | 763        | 91          | 3.15   |
| β-Cyclocostunolide              | 1068 , 0.700                  | 788        | 232         | 2.28   |
| Cyclotetrasiloxane, octamethyl- | 2016 , 0.870                  | 844        | 281         | 1.04   |
| Lanceol, cis                    | 932 , 2.410                   | 833        | 79          | 1.35   |
| Dihydro costuslactone           | 1132 , 3.000                  | 821        | 217         | 1.31   |
| Alantolacton                    | 1220 , 3.140                  | 847        | 232         | 1.17   |

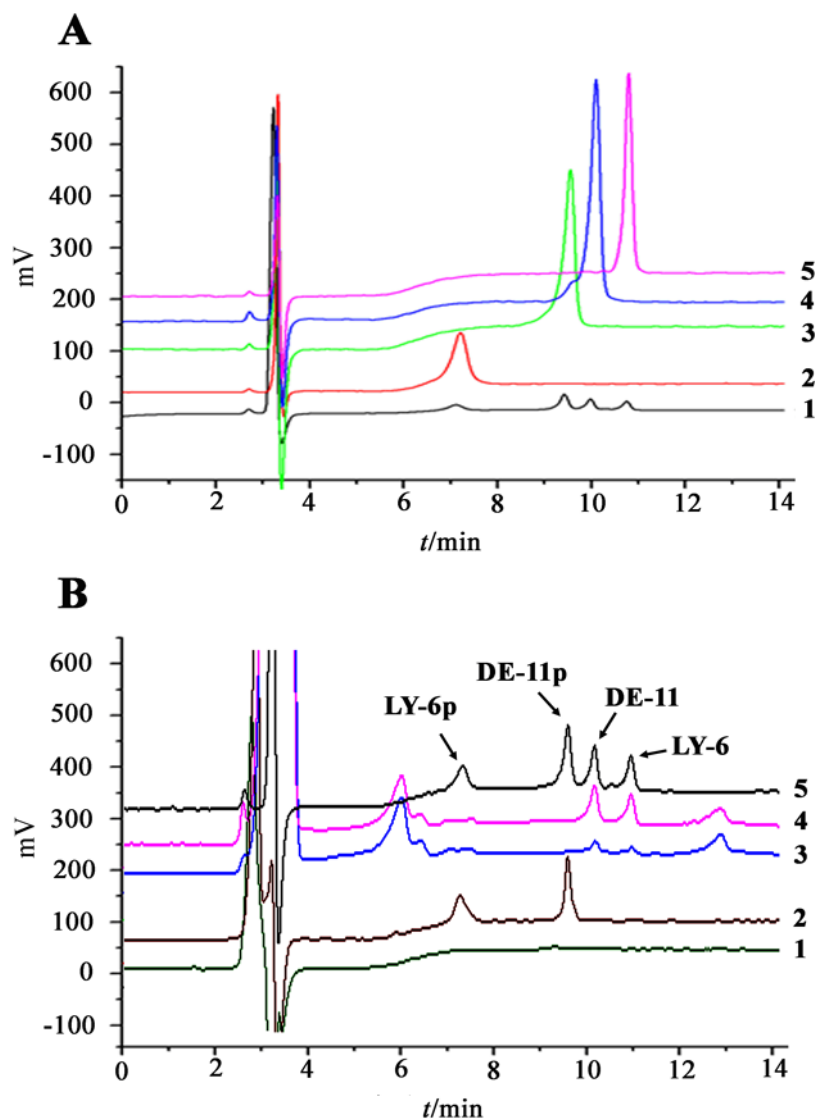

**Figure S3.** (A) Overlap chromatography of (1) Mixed peptide standards, (2) Phosphorylated peptide LY-6p, (3) Phosphorylated peptide DE-11p, (4) Nonphosphorylated peptide DE-11, and (5) Nonphosphorylated peptide LY-6 by high performance liquid chromatography coupled with ultraviolet detection (HPLC-UV); (B) Overlap chromatography of (1) Elution buffer II, (2) Elution buffer I, (3) Wash buffer II, (4) Wash buffer I after TiO<sub>2</sub> beads enrichment, and (5) Mixed peptide in loading buffer before TiO<sub>2</sub> beads enrichment by HPLC-UV.

The commercial TiO<sub>2</sub> beads (GL Sciences, Tokyo, Japan) were used to enrichment of phosphorylated peptides according to the manufacturer's instructions, and the protocol was described in the method section "*TiO<sub>2</sub> enrichment and iTRAQ labeling*" of manuscript. A Shimadzu LC-20A series HPLC (Shimadzu, Kyoto, Japan) equipped with a binary pump and an

ultraviolet detector was used for the peptide samples. A TSKgel ODS-100V C18 column (5  $\mu\text{m}$ , 250  $\times$  4.6 mm, TOSOH, Japan) was used in the analysis. The detection wavelength was set at 220 nm. Solvent A (water, containing 0.05% TFA) and solvent B (ACN, containing 0.05% TFA) were used for gradient elution with the following program: 10–24% B for 0–14 min. The flow rate was 1.0 mL/min, the column temperature was 35  $^{\circ}\text{C}$ , and the injection volume was 10  $\mu\text{L}$ . The results revealed that the phosphorylated peptides (LY-6P and DE-11P) were in the elution buffer, and the nonphosphorylated peptides were in the wash buffer, therefore, the commercial  $\text{TiO}_2$  beads had excellent enrichment efficiency for phosphorylated peptides. Using three concentration levels peptides to evaluated the recovery rates of phosphorylated peptides, and the details were shown in **Table S5**.

**Table S5 Recovery of the peptide standards after  $\text{TiO}_2$  beads enrichment**

| Concentration<br>( $\mu\text{g}/\text{mL}$ ) | Recovery (%) n=3 |                |      |       |
|----------------------------------------------|------------------|----------------|------|-------|
|                                              | LY-6p            | DE-11p         | LY-6 | DE-11 |
| 10                                           | 83.7 $\pm$ 3.5   | 75.8 $\pm$ 1.9 | 0    | 0     |
| 50                                           | 86.2 $\pm$ 2.7   | 77.0 $\pm$ 2.3 | 0    | 0     |
| 100                                          | 88.4 $\pm$ 2.1   | 81.4 $\pm$ 3.8 | 0    | 0     |



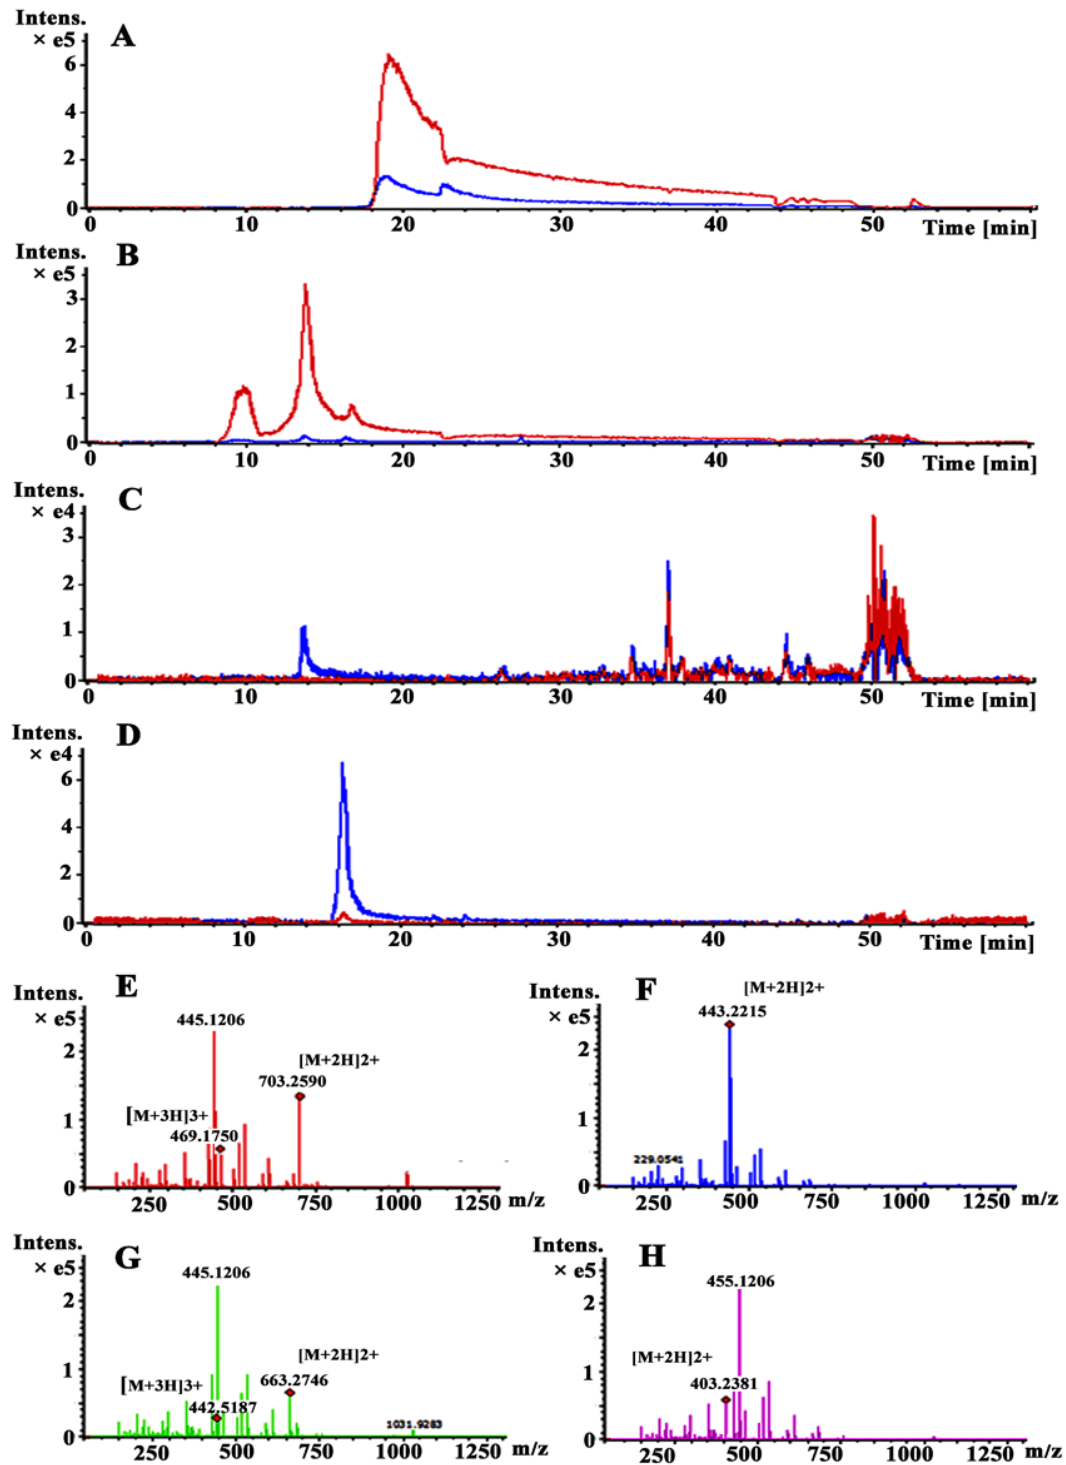

Figure S4. Extracted ion chromatogram of the peptides (A) DE-11p, (B) LY-6p, (C) LY-6, (D) DE-11, before (blue line) and after (red line) TiO<sub>2</sub> beads enrichment; Mass spectrum of the peptides (E) DE-11p, (F) LY-6p, (G) DE-11, and (H) LY-6 by nano liquid chromatography-maxis impact Q-TOF/MS system in positive scan model.

Considering the concentration of phosphorylated peptides will far lower than that of nonphosphorylated peptides in the peptide samples from MCF-7 breast cancer cells, we used

mixed peptide samples consisted of LY-6 (1  $\mu\text{g}/\text{mL}$ ) , DE-11 (1  $\mu\text{g}/\text{mL}$ ), LY-6p (0.1  $\mu\text{g}/\text{mL}$ ) and DE-11p (0.1  $\mu\text{g}/\text{mL}$ ) as test sample to evaluate enrichment efficiency of commercial  $\text{TiO}_2$  beads for phosphopeptide when high concentration nonphosphorylated peptides were as background. The results demonstrated that the mass response intensity of phosphopeptides DE-11p and LY-6p increased 6.5 times and 13.6 times, respectively, and nonphosphorylated peptides DE-11 and LY-6 almost could not be detected in the elution buffer after  $\text{TiO}_2$  beads enrichment. These results further demonstrated that the commercial  $\text{TiO}_2$  beads can enrich phosphorylated peptides efficiently.
